# Supplementary material for: Palladium-Catalyzed Oxidative Amination of Activated Olefins with N-Alkyl Anilines for Synthesis of Tertiary (E)-Enamines
Source: Royal Society of Chemistry journal article supplement (doi:10.1039/c4ra11543k), 2014-11-12

*Supporting Information for:*

**Palladium-Catalyzed Oxidative Amination of Activated Olefins with  
N-Alkyl Anilines for Synthesis of Tertiary (*E*)-Enamines**

Mi-Na Zhao, Xiao-Li Lian, Zhi-Hui Ren, Yao-Yu Wang, Zheng-Hui Guan\*

*Key Laboratory of Synthetic and Natural Functional Molecule Chemistry of Ministry of  
Education, Department of Chemistry & Materials Science, Northwest University, Xi'an  
710127, P. R. China*

*E-mail: [guanzzhh@nwu.edu.cn](mailto:guanzzhh@nwu.edu.cn)*

**CONTENTS**

|                                                                                                                              |                |
|------------------------------------------------------------------------------------------------------------------------------|----------------|
| <b>1. General information</b> -----                                                                                          | <b>S2</b>      |
| <b>2. General Procedure for Palladium-Catalyzed Oxidative Amination of Activated<br/>Olefins with N-Alkyl Anilines</b> ----- | <b>S2</b>      |
| <b>3. Characterization of compounds</b> -----                                                                                | <b>S2-S10</b>  |
| <b>4. Copies of <sup>1</sup>H and <sup>13</sup>C NMR spectra</b> -----                                                       | <b>S11-S60</b> |

## 1. General Information

$^1\text{H}$  NMR spectra were recorded on 400 MHz and  $^{13}\text{C}$  NMR spectra were recorded on 100 MHz in  $\text{CDCl}_3$ . The following abbreviations were used to explain multiplicities: s = singlet, d = doublet, t = triplet, q = quartet, m = multiplet. All products were further characterized by HRMS; copies of their  $^1\text{H}$  NMR and  $^{13}\text{C}$  NMR spectra are provided. Unless otherwise stated, all reagents and solvents were purchased from commercial suppliers and used without further purification. The *N*-alkyl anilines were prepared from the corresponding anilines according to the literature procedures.<sup>[1]</sup>

[1] a) Y. Pen, H. Liu, M. Tang, L. Cai, V. Pike, *Chin. J. Chem.* **2009**, *27*, 1339; b) E. Byun, B. Hong, K. De Castro, M. Lim, H. Rhee, *J. Org. Chem.* **2007**, *72*, 9815; c) J. Jiao, X.-R. Zhang, N.-H. Chang, J. Wang, J.-F. Wei, X.-Y. Shi, Z.-G. Chen, *J. Org. Chem.* **2011**, *76*, 1180.

## 2. General Procedure for Palladium-Catalyzed Oxidative Amination of Activated Olefins with *N*-Alkyl Anilines

*N*-alkyl aniline (0.2 mmol), acrylate (0.3 mmol),  $\text{PdCl}_2$  (5 mol%, 2.2 mg),  $\text{Cu}(\text{OAc})_2$  (0.24 mmol, 43.6mg),  $\text{PivOH}$  (0.2 mmol, 20.4 mg), and  $\text{CH}_3\text{CN}$  (2 mL) was charged in a 10 mL round bottom flask. Then, the reaction mixture was stirred at 100 °C. When the reaction was completed (detected by TLC), the mixture was cooled to room temperature. The reaction was quenched with  $\text{H}_2\text{O}$  (10 mL) and extracted with  $\text{EtOAc}$  ( $3 \times 10$  mL) or  $\text{CH}_2\text{Cl}_2$  ( $3 \times 10$  mL). The combined organic layers were dried over anhydrous  $\text{Na}_2\text{SO}_4$  and then evaporated in vacuo. The residue was purified by column chromatography on silica gel to afford the corresponding enamine with ethyl acetate/hexanes as the eluent.

## 3. Characterization of compounds

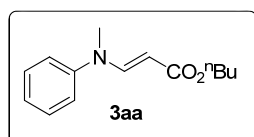

**3aa**: Yield: 84% (39.1 mg), colourless liquid. IR (KBr,  $\text{cm}^{-1}$ ): 3066, 2958, 2671, 1737, 1694, 1622, 1499, 1459, 1343, 1263, 1159, 1034, 978, 802, 759, 696, 517.  $^1\text{H}$  NMR ( $\text{CDCl}_3$ , 400 MHz):  $\delta$  = 7.94 (d,  $J$  = 13.2 Hz, 1 H), 7.36 (t,  $J$  = 7.6 Hz, 2 H), 7.13 (d,  $J$  = 8.0 Hz, 3 H), 4.95 (d,  $J$  = 13.2 Hz, 1 H), 4.14 (t,  $J$  = 6.4 Hz, 2 H), 3.24 (s, 3 H), 1.68-1.62 (m, 2 H), 1.44-1.38 (m, 2 H), 0.96 (t,  $J$  =

7.2 Hz, 3H);  $^{13}\text{C}$  NMR ( $\text{CDCl}_3$ , 100 MHz):  $\delta$  = 169.3, 148.3, 146.5, 129.4, 124.0, 119.7, 90.4, 63.2, 36.5, 31.0, 19.2, 13.8. HRMS Calcd (ESI)  $m/z$  for  $\text{C}_{14}\text{H}_{19}\text{NNaO}_2$ :  $[\text{M}+\text{Na}]^+$  256.1308, found: 256.1303.

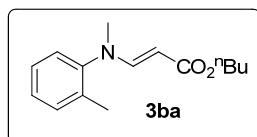

**3ba**: Yield: 92% (45.4 mg), pale yellow liquid. IR (KBr,  $\text{cm}^{-1}$ ): 3097, 2957, 1692, 1620, 1495, 1456, 1334, 1255, 1157, 1100, 982, 799, 768, 728, 623.  $^1\text{H}$  NMR ( $\text{CDCl}_3$ , 400 MHz):  $\delta$  = 7.59 (d,  $J$  = 12.8 Hz, 1 H), 7.23-7.21 (m, 3 H), 7.09-7.07 (m, 1 H), 4.83 (s, 1 H), 4.08 (m, 2 H), 3.13 (s, 3 H), 2.24 (s, 3 H), 1.63-1.59 (m, 2 H), 1.41-1.36 (m, 2 H), 0.94-0.91 (m, 3 H);  $^{13}\text{C}$  NMR ( $\text{CDCl}_3$ , 100 MHz):  $\delta$  = 131.4, 131.4, 63.1, 31.1, 19.2, 13.8. HRMS Calcd (ESI)  $m/z$  for  $\text{C}_{15}\text{H}_{21}\text{NNaO}_2$ :  $[\text{M}+\text{Na}]^+$  270.1465, found: 270.1466.

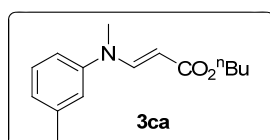

**3ca**: Yield: 70% (34.6 mg), colourless liquid. IR (KBr,  $\text{cm}^{-1}$ ): 3074, 2954, 1698, 1616, 1499, 1458, 1335, 1254, 1159, 1099, 985, 796, 766, 727, 617.  $^1\text{H}$  NMR ( $\text{CDCl}_3$ , 400 MHz):  $\delta$  = 7.94 (d,  $J$  = 12.8 Hz, 1 H), 7.24 (t,  $J$  = 7.6 Hz, 1 H), 6.94-6.92 (m, 3 H), 4.93 (d,  $J$  = 13.2 Hz, 1 H), 4.14 (t,  $J$  = 6.8 Hz, 2 H), 3.22 (s, 3 H), 2.36 (s, 3 H), 1.66-1.63 (m, 2 H), 1.44-1.39 (m, 2 H), 0.96 (t,  $J$  = 7.2 Hz, 3 H);  $^{13}\text{C}$  NMR ( $\text{CDCl}_3$ , 100 MHz):  $\delta$  = 169.3, 148.4, 146.5, 139.4, 129.1, 124.9, 120.5, 116.8, 90.0, 63.2, 36.5, 31.0, 21.4, 19.2, 13.8. HRMS Calcd (ESI)  $m/z$  for  $\text{C}_{15}\text{H}_{21}\text{NNaO}_2$ :  $[\text{M}+\text{Na}]^+$  270.1465, found: 270.1462.

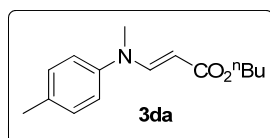

**3da**: Yield: 68% (33.6 mg), colourless liquid. IR (KBr,  $\text{cm}^{-1}$ ): 3099, 3031, 2958, 1694, 1601, 1515, 1458, 1405, 1261, 1158, 982, 811, 737, 618, 549.  $^1\text{H}$  NMR ( $\text{CDCl}_3$ , 400 MHz):  $\delta$  = 7.92 (d,  $J$  = 12.8 Hz, 1 H), 7.14 (d,  $J$  = 8.4 Hz, 2 H), 7.01 (d,  $J$  = 8.4 Hz, 2 H), 4.91 (d,  $J$  = 12.8 Hz, 1 H), 4.15 (t,  $J$  = 6.4 Hz, 2 H), 3.21 (s, 3 H), 2.32 (s, 3 H), 1.66-1.61 (m, 2 H), 1.42-1.38 (m, 2 H), 0.95 (t,  $J$  = 7.2 Hz, 3 H);  $^{13}\text{C}$  NMR ( $\text{CDCl}_3$ , 100 MHz):  $\delta$  = 169.4, 148.6, 144.2, 133.8, 129.8, 119.9, 89.6, 63.2, 36.7, 31.0, 20.6, 19.2, 13.7. HRMS Calcd (ESI)  $m/z$  for  $\text{C}_{15}\text{H}_{21}\text{NNaO}_2$ :  $[\text{M}+\text{Na}]^+$  270.1465, found:

270.1457.

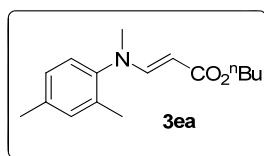

**3ea:** Yield: 93% (48.5 mg), colourless liquid. IR (KBr,  $\text{cm}^{-1}$ ): 3128, 2925, 2855, 1692, 1621, 1404, 1257, 1144, 1104, 799, 742, 617.  $^1\text{H}$  NMR ( $\text{CDCl}_3$ , 400 MHz):  $\delta$  = 7.54 (d,  $J$  = 10.4 Hz, 1 H), 7.03-6.93 (m, 3 H), 4.05 (s, 2 H), 3.68-3.67 (m, 1H), 3.06 (s, 3 H), 2.30 (s, 3 H), 2.11-2.09 (m, 3 H), 1.58-1.55 (m, 2 H), 1.37-1.35 (m, 2 H), 0.92-0.88 (m, 3 H);  $^{13}\text{C}$  NMR ( $\text{CDCl}_3$ , 100 MHz):  $\delta$  = 132.0, 63.0, 31.1, 22.7, 20.9, 19.2, 13.8. HRMS Calcd (ESI)  $m/z$  for  $\text{C}_{16}\text{H}_{23}\text{NNaO}_2$ :  $[\text{M}+\text{Na}]^+$  284.1621, found: 284.1618.

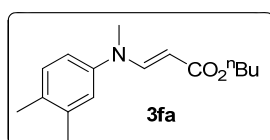

**3fa:** Yield: 80% (41.8 mg), colourless liquid. IR (KBr,  $\text{cm}^{-1}$ ): 3125, 2958, 1694, 1601, 1506, 1453, 1403, 1332, 1265, 1155, 1112, 1028, 977, 802, 736, 617.  $^1\text{H}$  NMR ( $\text{CDCl}_3$ , 400 MHz):  $\delta$  = 7.90 (d,  $J$  = 13.2 Hz, 1 H), 7.09 (d,  $J$  = 8.0 Hz, 1 H), 6.91 (s, 1 H), 6.86 (d,  $J$  = 8.0 Hz, 1 H), 4.88 (d,  $J$  = 13.2 Hz, 1 H), 4.13 (t,  $J$  = 6.8 Hz, 2 H), 3.20 (s, 3 H), 2.26 (s, 3 H), 2.23 (s, 3 H), 1.67-1.60 (m, 2 H), 1.44-1.38 (m, 2 H), 0.95 (t,  $J$  = 7.6 Hz, 3 H);  $^{13}\text{C}$  NMR ( $\text{CDCl}_3$ , 100 MHz):  $\delta$  = 169.5, 148.8, 144.6, 137.7, 132.6, 130.3, 121.4, 117.4, 89.4, 63.2, 36.8, 31.1, 19.9, 19.2, 19.0, 13.8. HRMS Calcd (ESI)  $m/z$  for  $\text{C}_{16}\text{H}_{23}\text{NNaO}_2$ :  $[\text{M}+\text{Na}]^+$  284.1621, found: 284.1618.

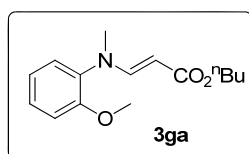

**3ga:** Yield: 74% (38.9 mg), pale yellow liquid. IR (KBr,  $\text{cm}^{-1}$ ): 3129, 2925, 2855, 1691, 1617, 1503, 1404, 1266, 1110, 801, 748, 617.  $^1\text{H}$  NMR ( $\text{CDCl}_3$ , 400 MHz):  $\delta$  = 7.66 (d,  $J$  = 13.2 Hz, 1 H), 7.24-7.20 (m, 1 H), 7.10-7.08 (m, 1 H), 6.96-6.93 (m, 2 H), 4.81 (s, 1 H), 4.10 (t,  $J$  = 6.8 Hz, 2 H), 3.84 (s, 3 H), 3.14 (s, 3 H), 1.63-1.60 (m, 2 H), 1.42-1.37 (m, 2 H), 0.94 (t,  $J$  = 7.6 Hz, 3 H);  $^{13}\text{C}$  NMR ( $\text{CDCl}_3$ , 100 MHz):  $\delta$  = 169.6, 121.0, 112.1, 63.0, 55.6, 31.1, 22.7, 19.3, 13.8. HRMS Calcd (ESI)  $m/z$  for  $\text{C}_{15}\text{H}_{21}\text{NNaO}_2$ :  $[\text{M}+\text{Na}]^+$  270.1465, found: 270.1466.

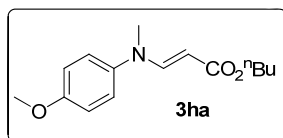

**3ha:** Yield: 62% (31.5 mg), pale yellow liquid. IR (KBr,  $\text{cm}^{-1}$ ): 3123, 2926, 1690, 1611, 1513, 1406, 1246, 1155, 1121, 981, 825, 617.  $^1\text{H}$  NMR ( $\text{CDCl}_3$ , 400 MHz):  $\delta$  = 7.81 (d,  $J$  = 12.8 Hz, 1 H), 7.06-7.04 (m, 2 H), 6.88-6.86 (m, 2 H), 4.84 (d,  $J$  = 12.8 Hz, 1 H), 4.11 (t,  $J$  = 6.8 Hz, 2 H), 3.79 (s, 3 H), 3.19 (s, 3 H), 1.64-1.61 (m, 2 H), 1.41-1.39 (m, 2 H), 0.94 (t,  $J$  = 7.2 Hz, 3 H);  $^{13}\text{C}$  NMR ( $\text{CDCl}_3$ , 100 MHz):  $\delta$  = 169.4, 156.6, 149.3, 140.1, 121.9, 114.5, 88.9, 63.1, 55.4, 37.4, 31.0, 19.2, 13.7. HRMS Calcd (ESI)  $m/z$  for  $\text{C}_{15}\text{H}_{22}\text{NO}_3$ :  $[\text{M}+\text{H}]^+$  264.1594, found: 264.1594.

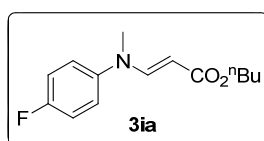

**3ia:** Yield: 75% (37.7 mg), colourless liquid. IR (KBr,  $\text{cm}^{-1}$ ): 3111, 2959, 1693, 1620, 1510, 1403, 1336, 1228, 1159, 981, 834, 803, 617, 519.  $^1\text{H}$  NMR ( $\text{CDCl}_3$ , 400 MHz):  $\delta$  = 7.75 (d,  $J$  = 13.2 Hz, 1 H), 7.02-6.94 (m, 4 H), 4.85 (d,  $J$  = 13.2 Hz, 1 H), 4.06-4.02 (m, 2 H), 3.14 (s, 3 H), 1.58-1.52 (m, 2 H), 1.36-1.30 (m, 2 H), 0.88-0.84 (m, 3 H);  $^{13}\text{C}$  NMR ( $\text{CDCl}_3$ , 100 MHz):  $\delta$  = 169.2, 159.5 (d,  $J_{\text{CF}}$  = 242.9 Hz), 148.6, 142.9, 121.8 (d,  $J_{\text{CF}}$  = 8.3 Hz), 116.1 (d,  $J_{\text{CF}}$  = 22.7 Hz), 90.3, 63.3, 37.1, 31.0, 19.2, 13.7. HRMS Calcd (ESI)  $m/z$  for  $\text{C}_{14}\text{H}_{18}\text{FNNaO}_2$ :  $[\text{M}+\text{Na}]^+$  274.1214, found: 274.1212.

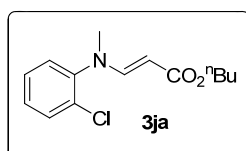

**3ja:** Yield: 78% (41.7 mg), colourless liquid.  $^1\text{H}$  NMR ( $\text{CDCl}_3$ , 400 MHz):  $\delta$  = 7.88 (d,  $J$  = 12.8 Hz, 1 H), 7.27-7.23 (m, 1 H), 7.11 (d,  $J$  = 8.0 Hz, 1 H), 7.09-7.05 (m, 1 H), 7.01-6.99 (m, 1 H), 4.99 (d,  $J$  = 13.2 Hz, 1 H), 4.13 (t,  $J$  = 6.8 Hz, 2 H), 3.21 (s, 3 H), 1.66-1.60 (m, 2 H), 1.43-1.38 (m, 2 H), 0.95 (t,  $J$  = 7.2 Hz, 3 H);  $^{13}\text{C}$  NMR ( $\text{CDCl}_3$ , 100 MHz):  $\delta$  = 169.2, 130.8, 127.9, 89.0, 63.2, 31.0, 19.2, 13.8. HRMS Calcd (ESI)  $m/z$  for  $\text{C}_{14}\text{H}_{18}\text{ClNNaO}_2$ :  $[\text{M}+\text{Na}]^+$  290.0918, found: 290.0923.

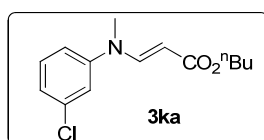

**3ka**: Yield: 70% (37.4 mg), pale yellow liquid. IR (KBr,  $\text{cm}^{-1}$ ): 3096, 2958, 2870, 1696, 1622, 1584, 1485, 1332, 1265, 1162, 1034, 999, 806, 777, 687, 615.  $^1\text{H}$  NMR ( $\text{CDCl}_3$ , 400 MHz):  $\delta$  = 7.89 (d,  $J$  = 13.2 Hz, 1 H), 7.29-7.25 (m, 1 H), 7.11-7.00 (m, 3 H), 5.00 (d,  $J$  = 13.2 Hz, 1 H), 4.14 (t,  $J$  = 6.8 Hz, 2 H), 3.22 (s, 3 H), 1.68-1.61 (m, 2 H), 1.44-1.37 (m, 2 H), 0.96 (t,  $J$  = 7.6 Hz, 3 H);  $^{13}\text{C}$  NMR ( $\text{CDCl}_3$ , 100 MHz):  $\delta$  = 169.0, 147.5, 147.4, 135.1, 130.4, 123.8, 119.6, 117.4, 91.9, 63.4, 36.2, 31.0, 19.2, 13.8. HRMS Calcd (ESI)  $m/z$  for  $\text{C}_{14}\text{H}_{18}\text{ClNNaO}_2$ :  $[\text{M}+\text{Na}]^+$  290.0918, found: 290.0920.

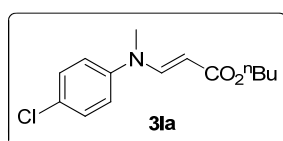

**3la**: Yield: 87% (46.5 mg), colourless liquid. IR (KBr,  $\text{cm}^{-1}$ ): 3100, 2925, 2856, 1696, 1620, 1586, 1496, 1458, 1403, 1333, 1263, 1160, 1122, 1069, 980, 823, 618, 520.  $^1\text{H}$  NMR ( $\text{CDCl}_3$ , 400 MHz):  $\delta$  = 7.87 (d,  $J$  = 13.2 Hz, 1 H), 7.31 (d,  $J$  = 8.8 Hz, 2 H), 7.06 (d,  $J$  = 8.8 Hz, 2 H), 4.97 (d,  $J$  = 13.2 Hz, 1 H), 4.14 (t,  $J$  = 6.8 Hz, 2 H), 3.22 (s, 3 H), 1.66-1.61 (m, 2 H), 1.42-1.40 (m, 2 H), 0.96 (t,  $J$  = 7.6 Hz, 3 H);  $^{13}\text{C}$  NMR ( $\text{CDCl}_3$ , 100 MHz):  $\delta$  = 169.1, 147.8, 145.1, 129.4, 120.9, 91.3, 63.4, 36.6, 31.0, 19.2, 13.8. HRMS Calcd (ESI)  $m/z$  for  $\text{C}_{14}\text{H}_{18}\text{ClNNaO}_2$ :  $[\text{M}+\text{Na}]^+$  290.0918, found: 290.0924.

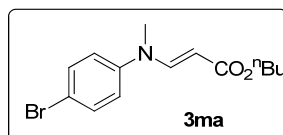

**3ma**: Yield: 84% (52.2 mg), pale yellow liquid. IR (KBr,  $\text{cm}^{-1}$ ): 3096, 2958, 2871, 1693, 1617, 1582, 1494, 1460, 1332, 1264, 1161, 1069, 979, 808, 758, 619, 516.  $^1\text{H}$  NMR ( $\text{CDCl}_3$ , 400 MHz):  $\delta$  = 7.85 (d,  $J$  = 13.2 Hz, 1 H), 7.43 (d,  $J$  = 8.4 Hz, 2 H), 6.98 (d,  $J$  = 8.4 Hz, 2 H), 4.96 (d,  $J$  = 13.2 Hz, 1 H), 4.12 (t,  $J$  = 6.8 Hz, 2 H), 3.20 (s, 3 H), 1.65-1.59 (m, 2 H), 1.42-1.37 (m, 2 H), 0.94 (t,  $J$  = 7.2 Hz, 3 H);  $^{13}\text{C}$  NMR ( $\text{CDCl}_3$ , 100 MHz):  $\delta$  = 169.0, 147.6, 145.5, 132.3, 121.1, 116.8, 91.4, 63.4, 36.4, 31.0, 19.2, 13.7. HRMS Calcd (ESI)  $m/z$  for  $\text{C}_{14}\text{H}_{19}\text{BrNO}_2$ :  $[\text{M}+\text{H}]^+$  312.0594, found: 312.0588.

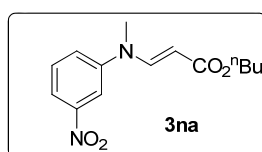

**3na**: Yield: 70% (38.9 mg), yellow liquid. IR (KBr,  $\text{cm}^{-1}$ ): 3099, 2958, 2928, 2868, 1697, 1605,

1531, 1488, 1461, 1348, 1265, 1165, 1130, 1033, 884, 803, 738, 679, 613.  $^1\text{H}$  NMR ( $\text{CDCl}_3$ , 400 MHz):  $\delta$  = 7.97-7.93 (m, 3 H), 7.56-7.46 (m, 2 H), 5.12 (d,  $J$  = 13.2 Hz, 1 H), 4.16 (t,  $J$  = 6.8 Hz, 1 H), 3.32 (s, 3 H), 1.69-1.62 (m, 2 H), 1.45-1.39 (m, 2 H), 0.97 (t,  $J$  = 7.6 Hz, 3 H);  $^{13}\text{C}$  NMR ( $\text{CDCl}_3$ , 100 MHz):  $\delta$  = 168.5, 148.9, 147.1, 146.4, 130.2, 124.4, 118.0, 113.4, 93.6, 63.5, 36.0, 30.9, 19.1, 13.7. HRMS Calcd (ESI)  $m/z$  for  $\text{C}_{14}\text{H}_{18}\text{N}_2\text{NaO}_4$ :  $[\text{M}+\text{Na}]^+$  301.1159, found: 301.1160.

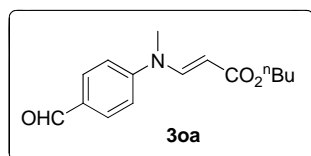

**3oa**: Yield: 77% (40.2 mg), white liquid.  $^1\text{H}$  NMR ( $\text{CDCl}_3$ , 400 MHz):  $\delta$  = 8.01 (d,  $J$  = 13.2 Hz, 1 H), 7.84 (d,  $J$  = 8.0 Hz, 2 H), 7.22 (d,  $J$  = 8.4 Hz, 2 H), 5.13 (d,  $J$  = 13.2 Hz, 1 H), 4.13 (t,  $J$  = 6.4 Hz, 2 H), 3.27 (s, 3 H), 1.64-1.61 (m, 2 H), 1.42-1.36 (m, 2 H), 0.93 (t,  $J$  = 7.2 Hz, 3 H);  $^{13}\text{C}$  NMR ( $\text{CDCl}_3$ , 100 MHz):  $\delta$  = 190.6, 168.6, 150.7, 145.9, 131.3, 131.3, 118.0, 94.2, 63.6, 35.5, 30.8, 19.1, 13.7. HRMS Calcd (ESI)  $m/z$  for  $\text{C}_{15}\text{H}_{19}\text{NNaO}_3$ :  $[\text{M}+\text{Na}]^+$  284.1257, found: 284.1261.

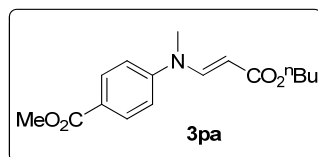

**3pa**: Yield: 84% (48.9 mg), white solid, mp 62-64 °C. IR (KBr,  $\text{cm}^{-1}$ ): 3110, 2958, 1699, 1592, 1512, 1404, 1265, 1115, 975, 830, 768, 617.  $^1\text{H}$  NMR ( $\text{CDCl}_3$ , 400 MHz):  $\delta$  = 8.02-7.99 (m, 3 H), 7.14 (d,  $J$  = 8.4 Hz, 2 H), 5.08 (d,  $J$  = 13.2 Hz, 1 H), 4.14 (t,  $J$  = 6.8 Hz, 2 H), 3.89 (s, 3 H), 3.26 (s, 3 H), 1.66-1.62 (m, 2 H), 1.43-1.38 (m, 2 H), 0.95 (t,  $J$  = 6.8 Hz, 3 H);  $^{13}\text{C}$  NMR ( $\text{CDCl}_3$ , 100 MHz):  $\delta$  = 168.8, 166.4, 149.7, 146.5, 131.1, 124.8, 117.8, 93.1, 63.5, 52.0, 35.7, 30.9, 19.2, 13.8. HRMS Calcd (ESI)  $m/z$  for  $\text{C}_{16}\text{H}_{21}\text{NNaO}_4$ :  $[\text{M}+\text{Na}]^+$  314.1363, found: 314.1366.

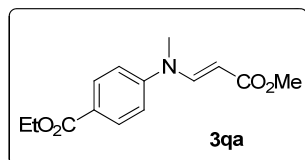

**3qa**: Yield: 76% (46.4 mg), pale yellow solid, mp 67-69 °C. IR (KBr,  $\text{cm}^{-1}$ ): 3144, 1706, 1624, 1588, 1513, 1404, 1263, 1170, 1124, 1023, 977, 844, 795, 766, 697, 617.  $^1\text{H}$  NMR ( $\text{CDCl}_3$ , 400 MHz):  $\delta$  = 8.04-8.01 (m, 3 H), 7.16 (d,  $J$  = 8.8 Hz, 2 H), 5.08 (d,  $J$  = 13.2 Hz, 1 H), 4.39-4.34 (m, 2 H), 3.73 (s, 3 H), 3.27 (s, 3 H), 1.40 (t,  $J$  = 7.2 Hz, 3 H);  $^{13}\text{C}$  NMR ( $\text{CDCl}_3$ , 100 MHz):  $\delta$  = 169.1, 165.9, 149.6, 146.8, 131.1, 125.3, 117.9, 92.5, 60.9, 51.0, 35.7, 14.3. HRMS Calcd (ESI)  $m/z$  for

C<sub>14</sub>H<sub>17</sub>NNaO<sub>4</sub>: [M+Na]<sup>+</sup> 286.1050, found: 286.1051.

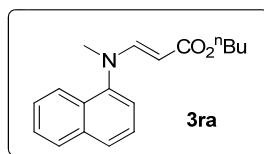

**3ra**: Yield: 60% (34.0 mg), pale yellow liquid. IR (KBr, cm<sup>-1</sup>): 3121, 2926, 2859, 1693, 1615, 1508, 1459, 1401, 1324, 1268, 1157, 1133, 1078, 975, 800, 776, 616. <sup>1</sup>H NMR (CDCl<sub>3</sub>, 400 MHz): δ = 7.90 (d, *J* = 8.4 Hz, 1 H), 7.81-7.77 (m, 3 H), 7.66-7.51 (m, 2 H), 7.48-7.44 (m, 1 H), 7.30-7.26 (m, 1 H), 4.97 (s, 1 H), 4.09 (s, 2 H), 3.32 (s, 3 H), 1.61 (s, 2 H), 1.39-1.37 (m, 2 H), 0.93 (t, *J* = 7.2 Hz, 3 H); <sup>13</sup>C NMR (CDCl<sub>3</sub>, 100 MHz): δ = 169.4, 134.7, 128.5, 126.9, 126.5, 125.6, 122.8, 114.5, 88.3, 63.1, 31.0, 19.2, 13.8. HRMS Calcd (ESI) *m/z* for C<sub>18</sub>H<sub>21</sub>NNaO<sub>2</sub>: [M+Na]<sup>+</sup> 306.1465, found: 306.1463.

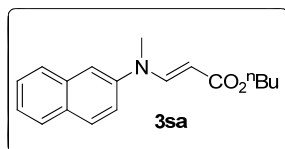

**3sa**: Yield: 45% (25.5 mg), pale yellow liquid. IR (KBr, cm<sup>-1</sup>): 3113, 2958, 1692, 1604, 1508, 1405, 1348, 1261, 1227, 1161, 1110, 977, 801, 751, 618. <sup>1</sup>H NMR (CDCl<sub>3</sub>, 400 MHz): δ = 8.09 (d, *J* = 13.2 Hz, 1 H), 7.85-7.77 (m, 3 H), 7.52-7.35 (m, 4 H), 5.04 (d, *J* = 13.2 Hz, 1 H), 4.18 (t, *J* = 6.4 Hz, 2 H), 3.35 (s, 3 H), 1.70-1.66 (m, 2 H), 1.47-1.42 (m, 2 H), 0.98 (t, *J* = 7.2 Hz, 3 H); <sup>13</sup>C NMR (CDCl<sub>3</sub>, 100 MHz): δ = 169.3, 148.4, 143.9, 133.8, 130.3, 129.4, 127.6, 127.3, 126.9, 125.2, 119.5, 116.4, 90.9, 63.3, 36.6, 31.0, 19.2, 13.8. HRMS Calcd (ESI) *m/z* for C<sub>18</sub>H<sub>21</sub>NNaO<sub>2</sub>: [M+Na]<sup>+</sup> 306.1465, found: 306.1459.

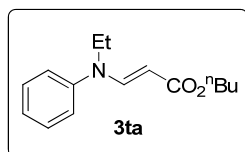

**3ta**: Yield: 72% (35.6 mg), colourless liquid. <sup>1</sup>H NMR (CDCl<sub>3</sub>, 400 MHz): δ = 7.81 (d, *J* = 13.6 Hz, 1 H), 7.34-7.30 (m, 2 H), 7.12-7.10 (m, 3 H), 4.92 (d, *J* = 13.6 Hz, 1 H), 4.10 (t, *J* = 6.4 Hz, 2 H), 3.70-3.66 (m, 2H), 1.63-1.59 (m, 2 H), 1.41-1.35 (m, 2 H), 1.24-1.21 (m, 3 H), 0.93 (t, *J* = 7.2 Hz, 3 H); <sup>13</sup>C NMR (CDCl<sub>3</sub>, 100 MHz): δ = 169.4, 147.3, 145.1, 129.3, 124.4, 120.6, 89.5, 63.1, 30.9, 29.5, 19.1, 13.7, 11.7. HRMS Calcd (ESI) *m/z* for C<sub>15</sub>H<sub>21</sub>NNaO<sub>2</sub>: [M+Na]<sup>+</sup> 270.1465, found: 270.1466.



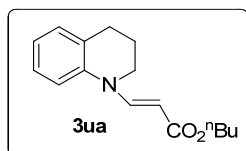

**3ua**: Yield: 55% (28.5 mg), pale yellow liquid. IR (KBr,  $\text{cm}^{-1}$ ): 3117, 2956, 2870, 1694, 1613, 1579, 1497, 1458, 1402, 1332, 1246, 1151, 1071, 970, 803, 753, 618.  $^1\text{H}$  NMR ( $\text{CDCl}_3$ , 400 MHz):  $\delta$  = 8.18 (d,  $J$  = 13.2 Hz, 1 H), 7.22-7.18 (m, 1 H), 7.13 (d,  $J$  = 8.0 Hz, 1 H), 7.07 (d,  $J$  = 7.2 Hz, 1 H), 6.96-6.93 (m, 1 H), 5.03 (d,  $J$  = 13.2 Hz, 1 H), 4.15 (t,  $J$  = 6.8 Hz, 2 H), 3.47 (t,  $J$  = 6.4 Hz, 2 H), 2.71 (t,  $J$  = 5.6 Hz, 2 H), 2.04-1.99 (m, 2 H), 1.69-1.62 (m, 2 H), 1.45-1.39 (m, 2 H), 0.96 (t,  $J$  = 7.6 Hz, 3 H);  $^{13}\text{C}$  NMR ( $\text{CDCl}_3$ , 100 MHz):  $\delta$  = 169.3, 145.5, 140.2, 128.7, 128.1, 127.6, 122.2, 115.8, 90.6, 63.3, 45.8, 31.0, 27.3, 22.3, 19.2, 13.8. HRMS Calcd (ESI)  $m/z$  for  $\text{C}_{16}\text{H}_{21}\text{NNaO}_2$ :  $[\text{M}+\text{Na}]^+$  282.1465, found: 282.1470.

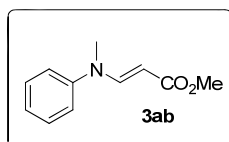

**3ab**: Yield: 75% (28.5 mg), pale yellow liquid. IR (KBr,  $\text{cm}^{-1}$ ): 3100, 2950, 1737, 1695, 1621, 1499, 1436, 1344, 1262, 1162, 1040, 978, 802, 760, 696, 618.  $^1\text{H}$  NMR ( $\text{CDCl}_3$ , 400 MHz):  $\delta$  = 7.86 (d,  $J$  = 13.2 Hz, 1 H), 7.28-7.24 (m, 2 H), 7.05-7.01 (m, 3 H), 4.86 (d,  $J$  = 12.8 Hz, 1 H), 3.62 (s, 3 H), 3.14 (s, 3 H);  $^{13}\text{C}$  NMR ( $\text{CDCl}_3$ , 100 MHz):  $\delta$  = 169.5, 148.5, 146.4, 129.4, 124.1, 119.7, 89.9, 50.8, 36.4. HRMS Calcd (ESI)  $m/z$  for  $\text{C}_{11}\text{H}_{13}\text{NNaO}_2$ :  $[\text{M}+\text{Na}]^+$  214.0838, found: 214.0836.

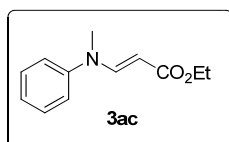

**3ac**: Yield: 76% (28.5 mg), pale yellow liquid. IR (KBr,  $\text{cm}^{-1}$ ): 3065, 2980, 1735, 1693, 1621, 1499, 1349, 1262, 1161, 1123, 1046, 978, 802, 760, 697, 619.  $^1\text{H}$  NMR ( $\text{CDCl}_3$ , 400 MHz):  $\delta$  = 7.94 (d,  $J$  = 13.2 Hz, 1 H), 7.36-7.32 (m, 2 H), 7.13-7.11 (m, 3 H), 4.94 (d,  $J$  = 13.2 Hz, 1 H), 4.20-4.14 (m, 2 H), 3.23 (s, 3 H), 1.30-1.25 (m, 3 H);  $^{13}\text{C}$  NMR ( $\text{CDCl}_3$ , 100 MHz):  $\delta$  = 169.1, 148.3, 146.5, 129.3, 124.0, 119.7, 90.3, 59.2, 36.4, 14.5. HRMS Calcd (ESI)  $m/z$  for  $\text{C}_{12}\text{H}_{15}\text{NNaO}_2$ :  $[\text{M}+\text{Na}]^+$  228.0995, found: 228.0992.

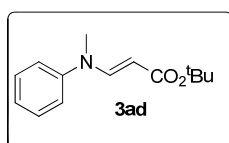

**3ad**: Yield: 60% (28.5 mg), pale yellow liquid. IR (KBr,  $\text{cm}^{-1}$ ): 3125, 2974, 2929, 1691, 1620, 1589, 1498, 1401, 1264, 1150, 1119, 1005, 804, 757, 695, 617.  $^1\text{H}$  NMR ( $\text{CDCl}_3$ , 400 MHz):  $\delta$  = 7.88 (d,  $J$  = 13.2 Hz, 1 H), 7.35-7.32 (m, 2 H), 7.13-7.08 (m, 3 H), 4.90 (d,  $J$  = 13.2 Hz, 1 H), 3.22 (s, 3 H), 1.50 (s, 9 H);  $^{13}\text{C}$  NMR ( $\text{CDCl}_3$ , 100 MHz):  $\delta$  = 168.8, 147.8, 146.7, 129.4, 123.9, 119.6, 92.3, 78.8, 36.4, 28.5. HRMS Calcd (ESI)  $m/z$  for  $\text{C}_{14}\text{H}_{19}\text{NNaO}_2$ :  $[\text{M}+\text{Na}]^+$  256.1308, found: 256.1303.

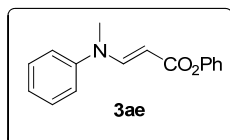

**3ae**: Yield: 84% (28.5 mg), pale yellow liquid. IR (KBr,  $\text{cm}^{-1}$ ): 3114, 2925, 1704, 1621, 1584, 1492, 1403, 1345, 1258, 1195, 1116, 1029, 979, 817, 788, 758, 693, 618, 532.  $^1\text{H}$  NMR ( $\text{CDCl}_3$ , 400 MHz):  $\delta$  = 8.10 (d,  $J$  = 13.2 Hz, 1 H), 7.40-7.36 (m, 4 H), 7.22-7.14 (m, 6 H), 5.13 (d,  $J$  = 13.2 Hz, 1 H), 3.32 (s, 3 H);  $^{13}\text{C}$  NMR ( $\text{CDCl}_3$ , 100 MHz):  $\delta$  = 167.5, 151.3, 150.0, 146.3, 129.5, 129.2, 125.0, 124.6, 121.9, 120.1, 89.1, 36.9. HRMS Calcd (ESI)  $m/z$  for  $\text{C}_{16}\text{H}_{15}\text{NNaO}_2$ :  $[\text{M}+\text{Na}]^+$  276.0995, found: 276.1002.

#### 4. Copies of $^1\text{H}$ and $^{13}\text{C}$ NMR spectra

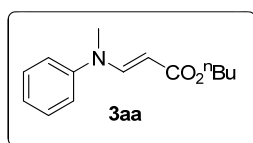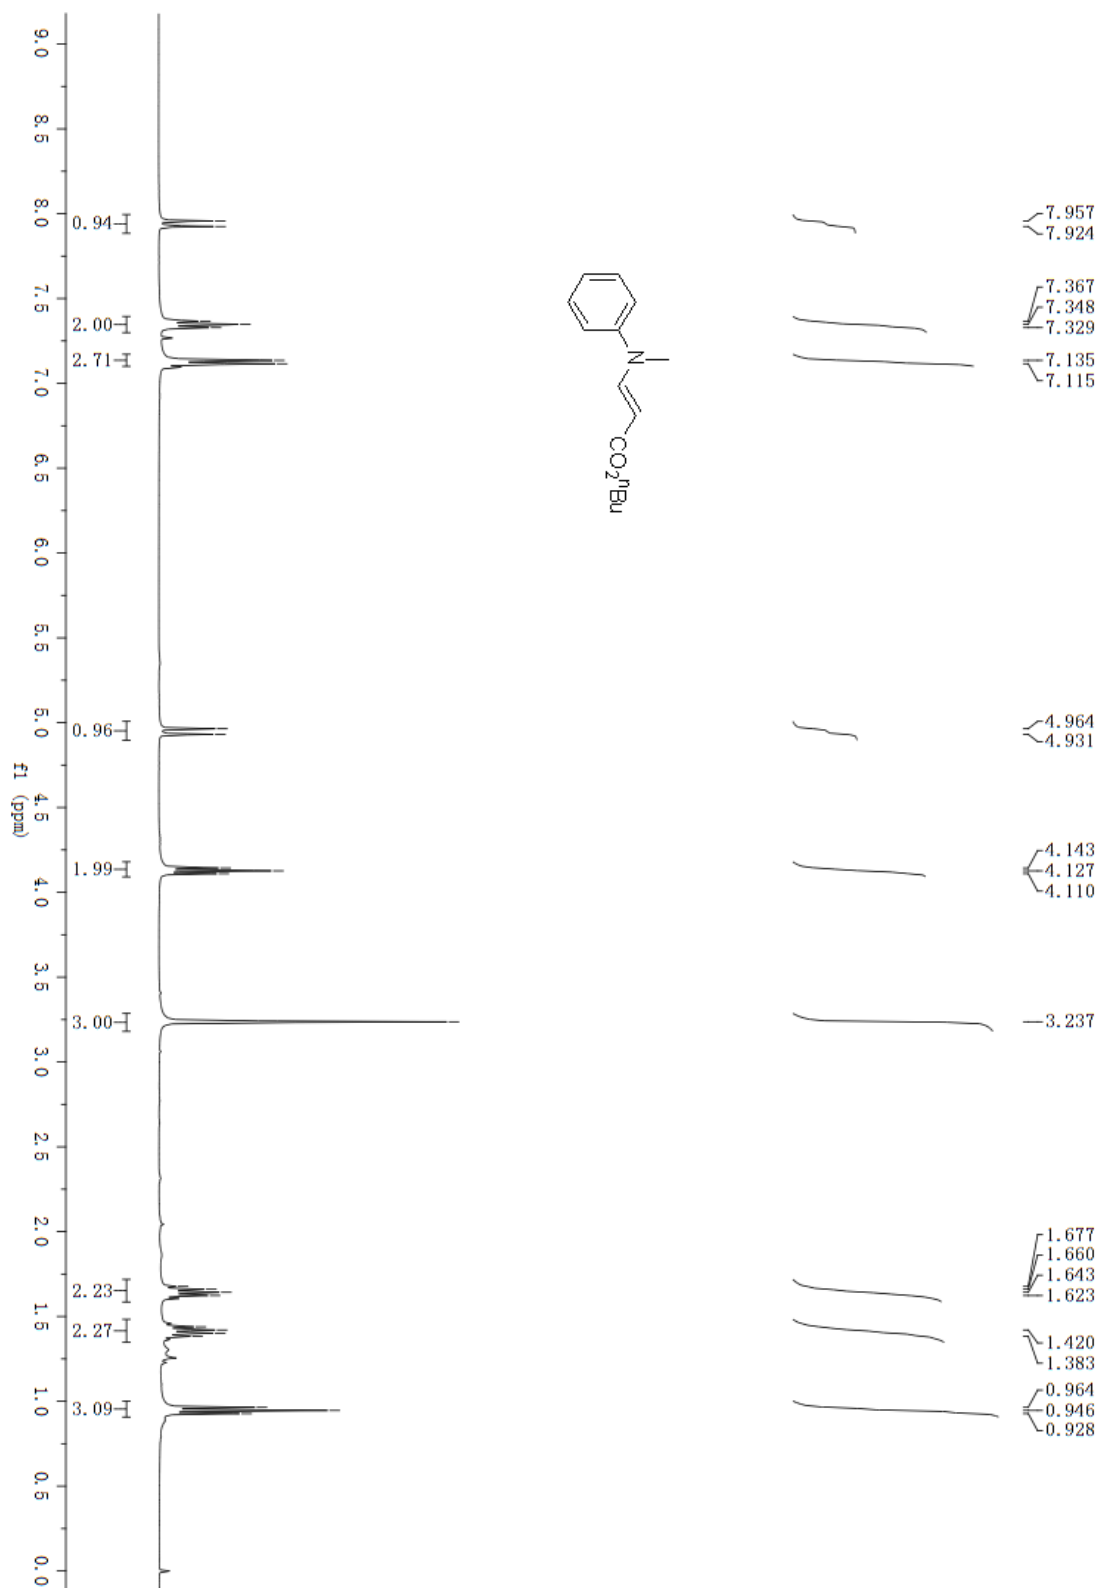

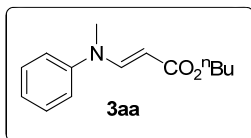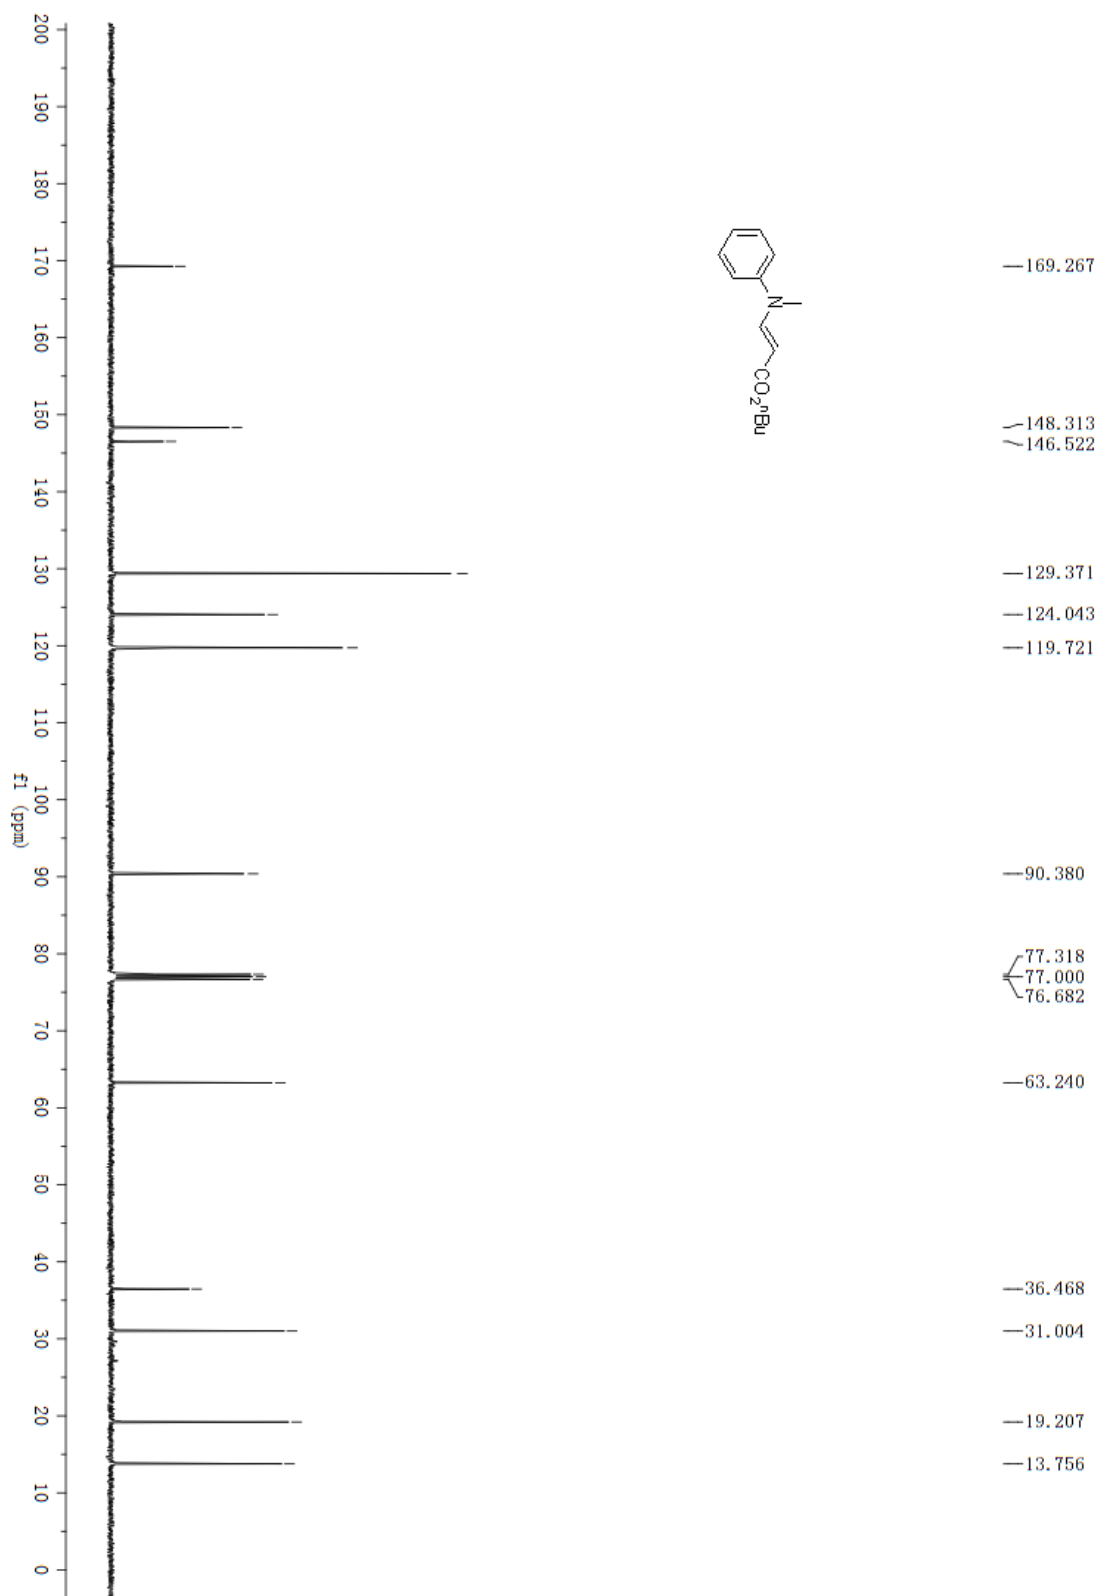

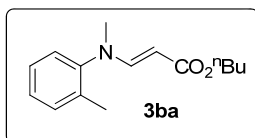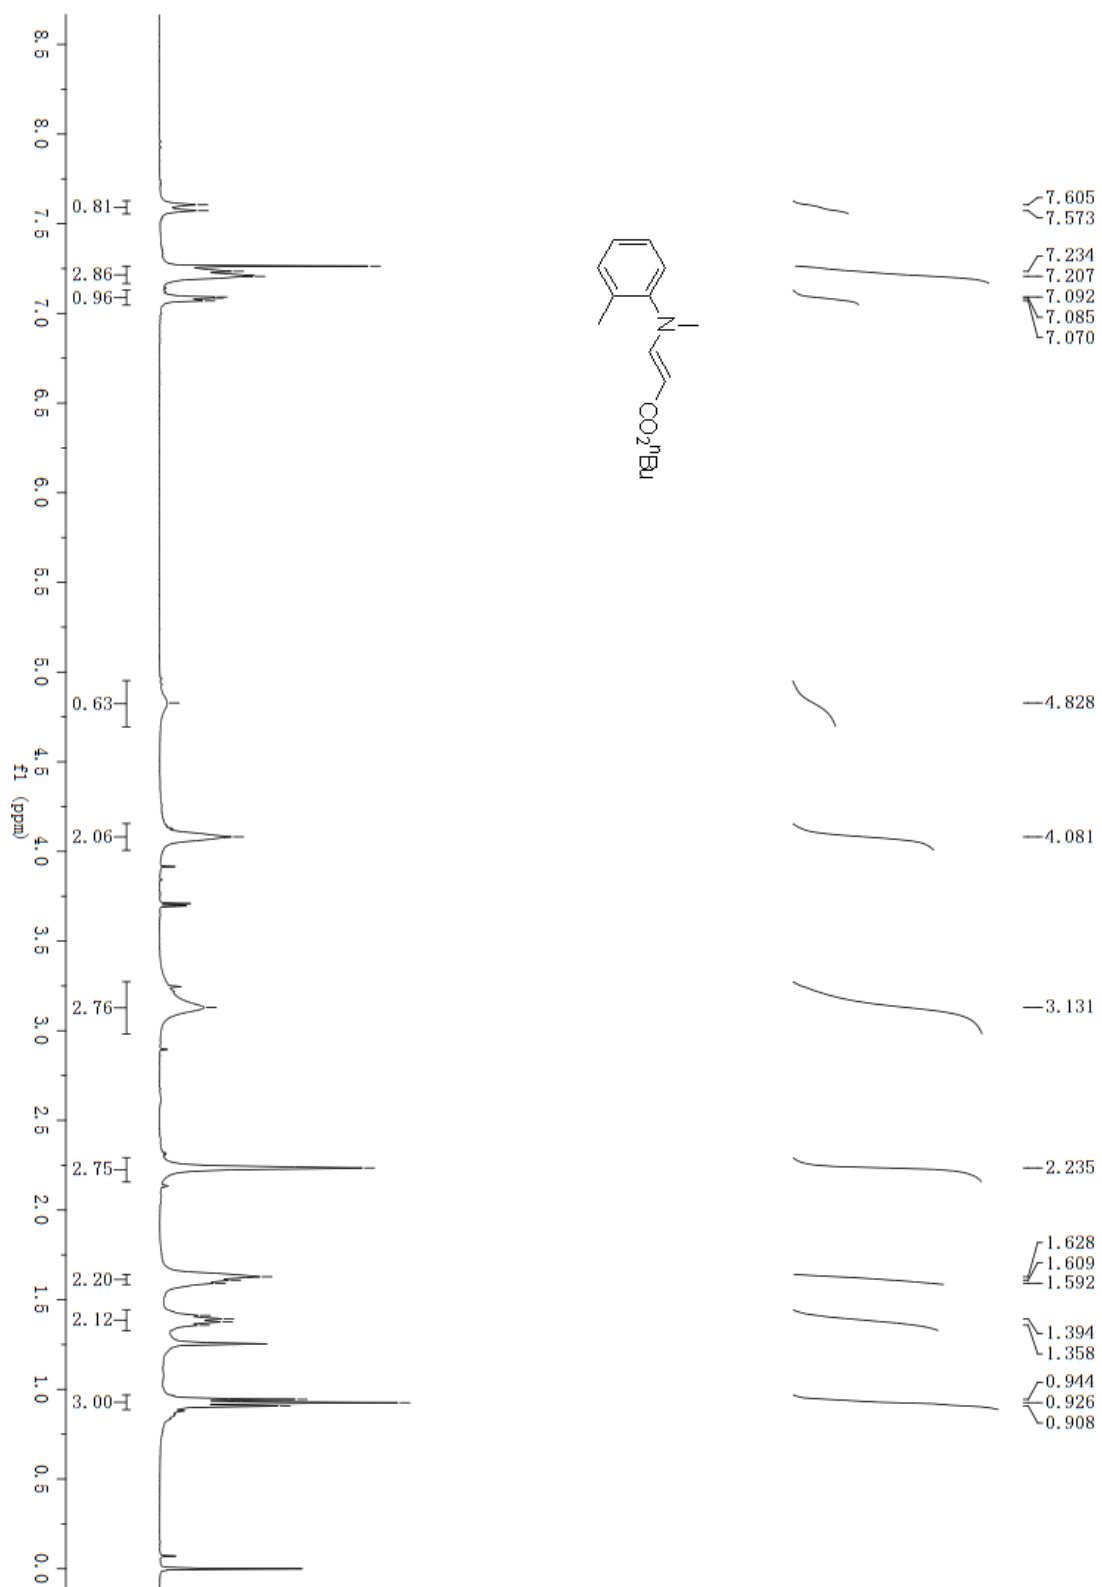

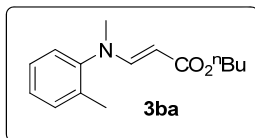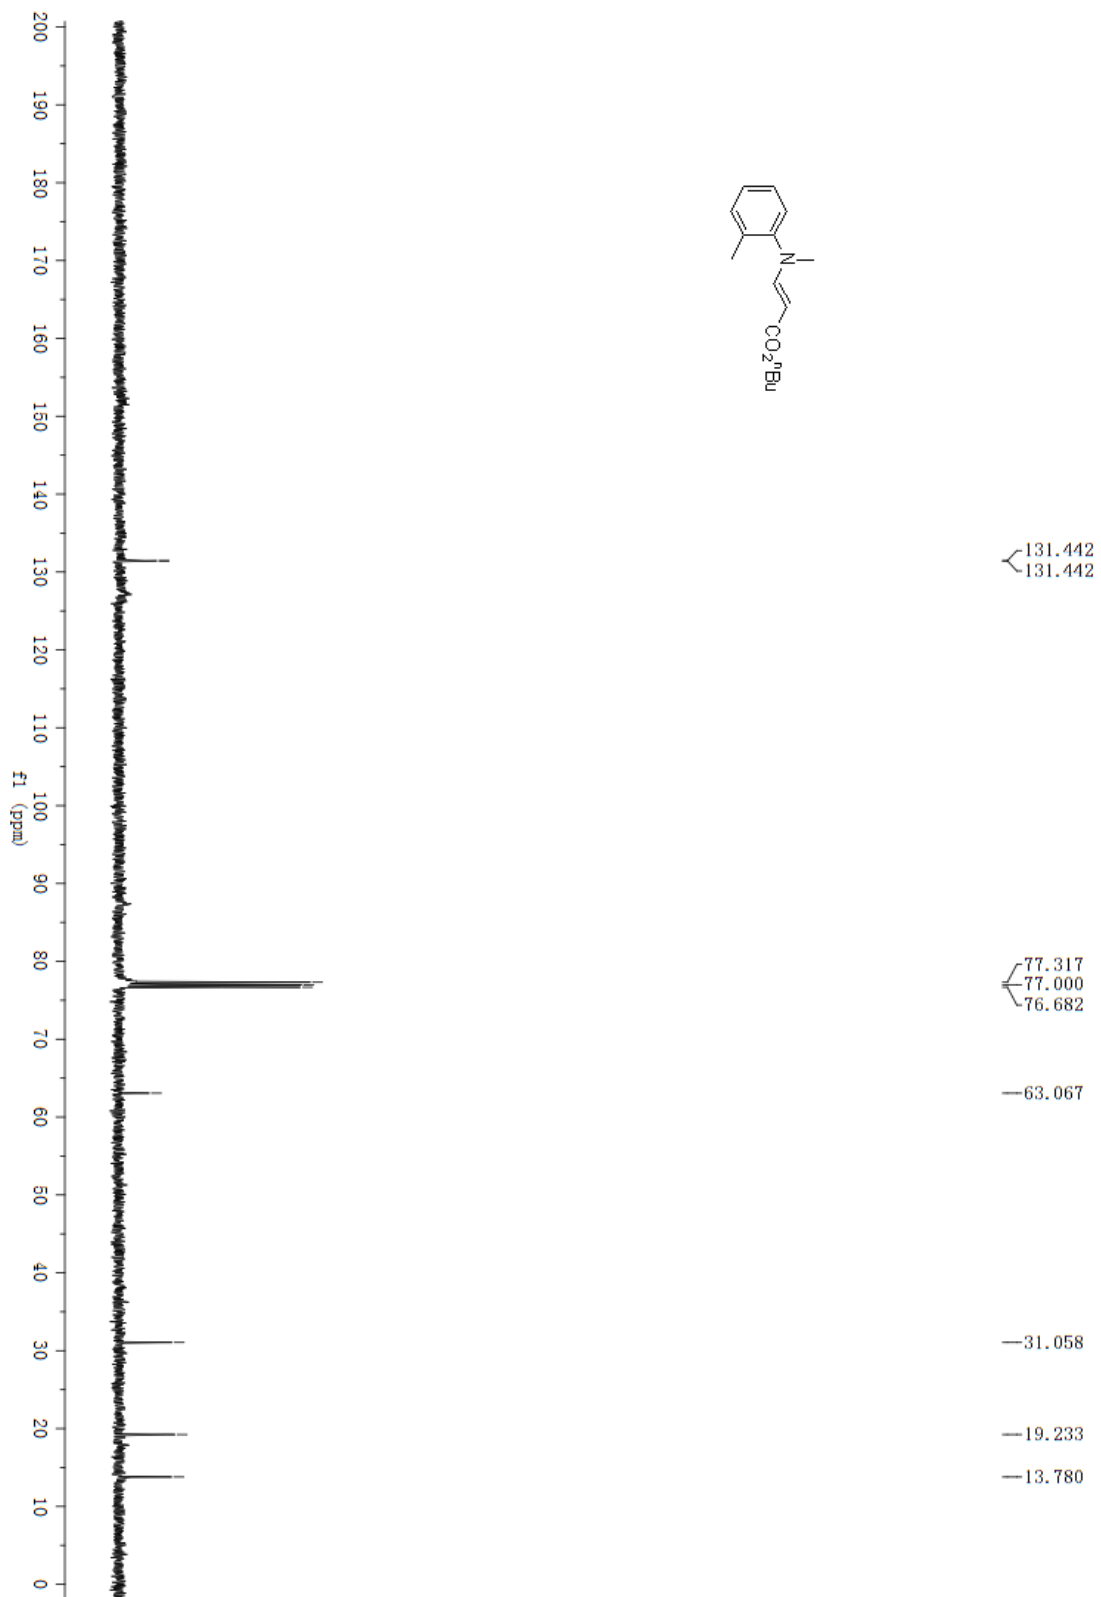

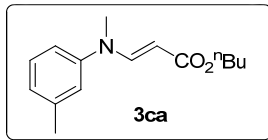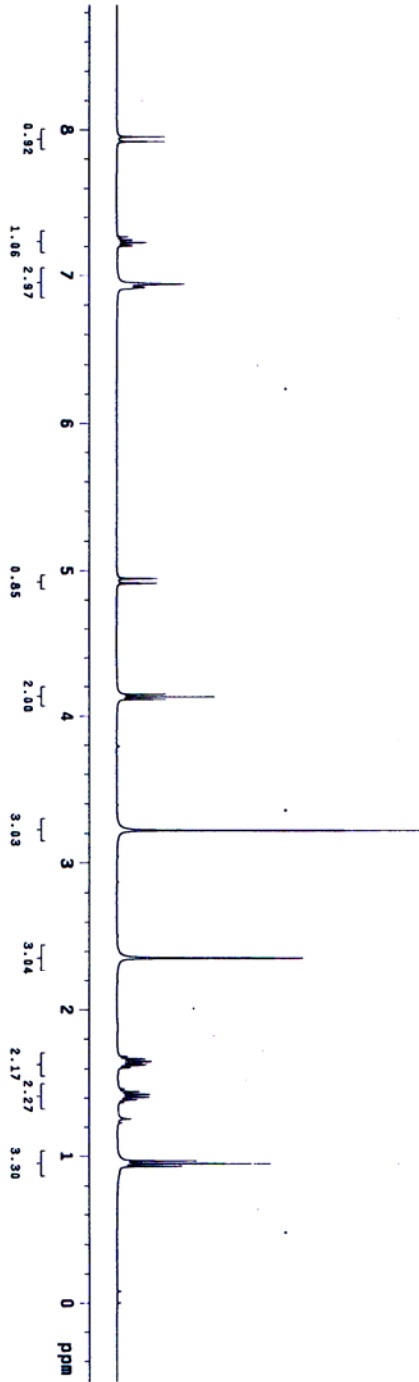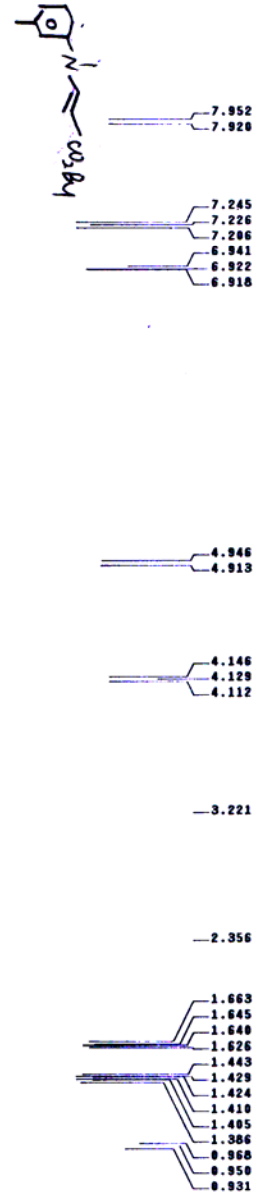

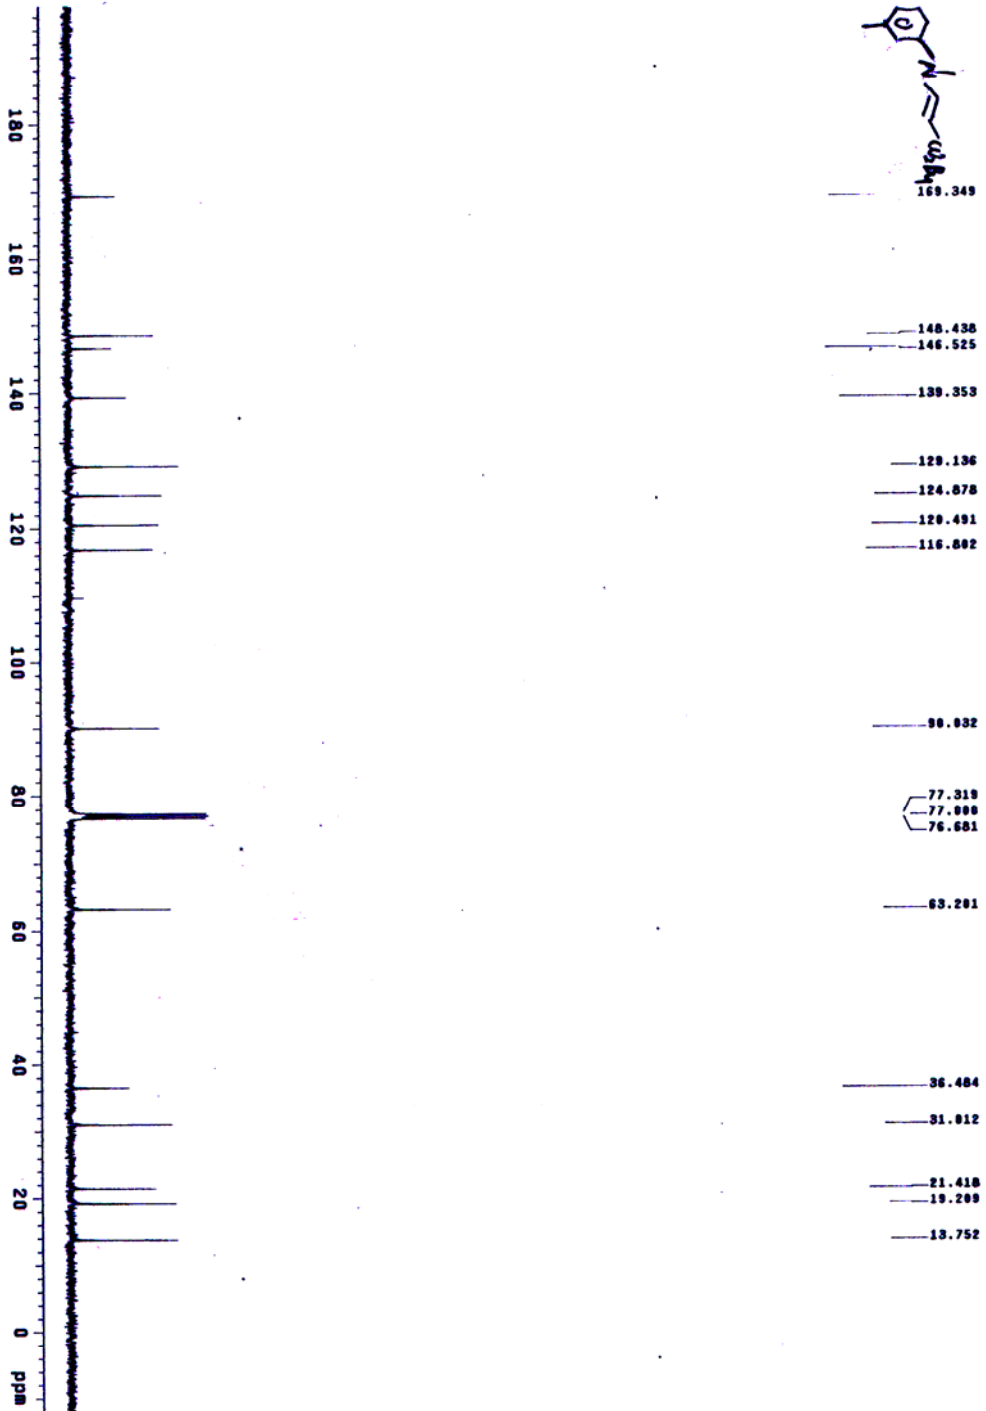



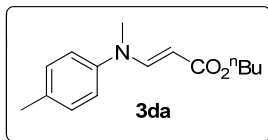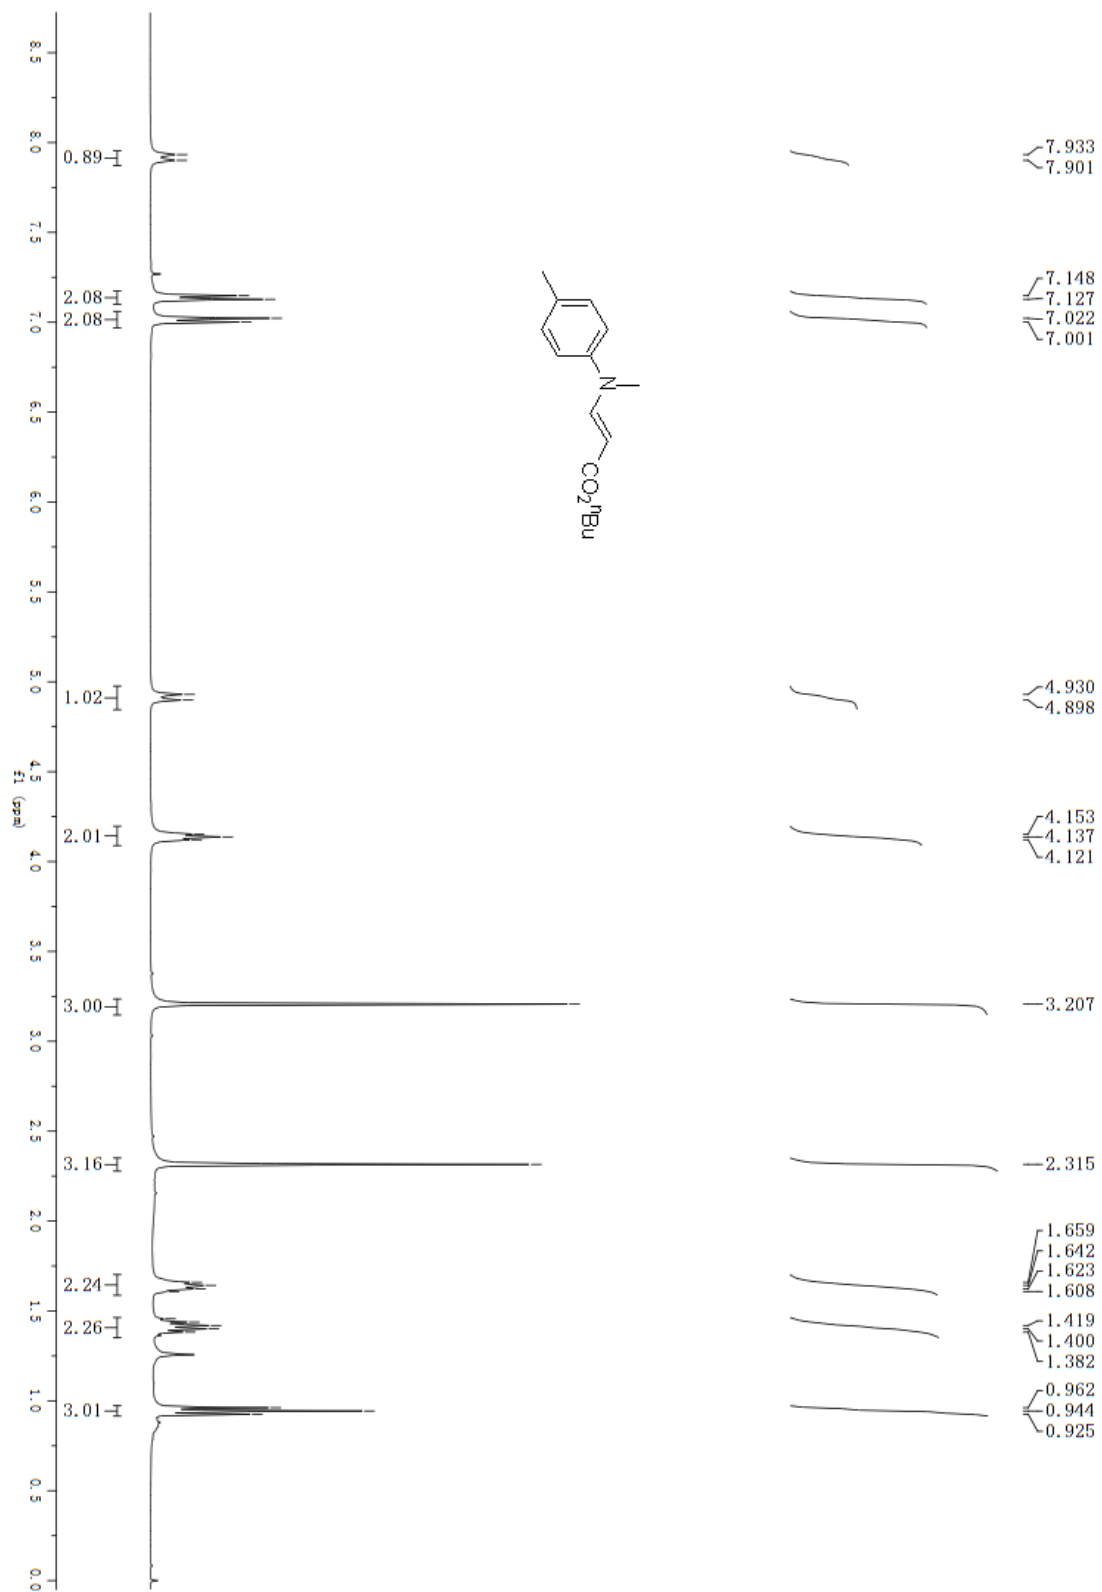

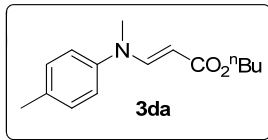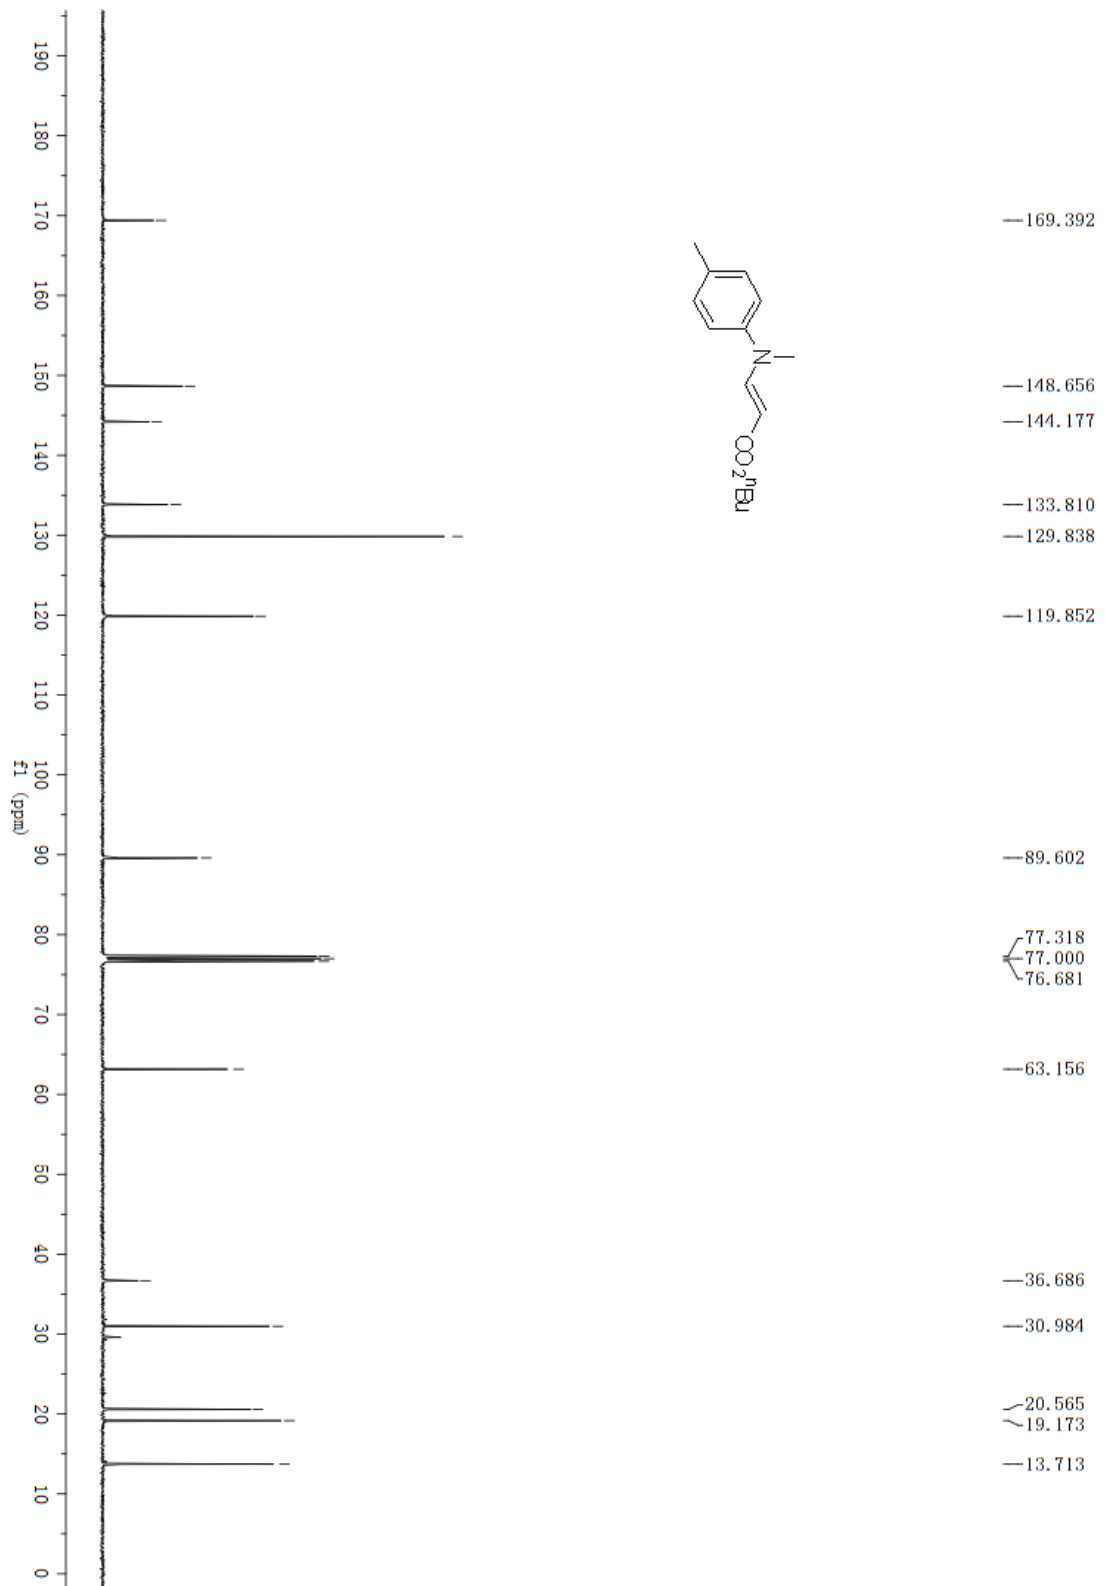

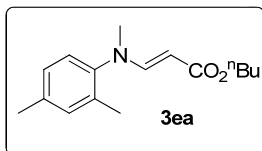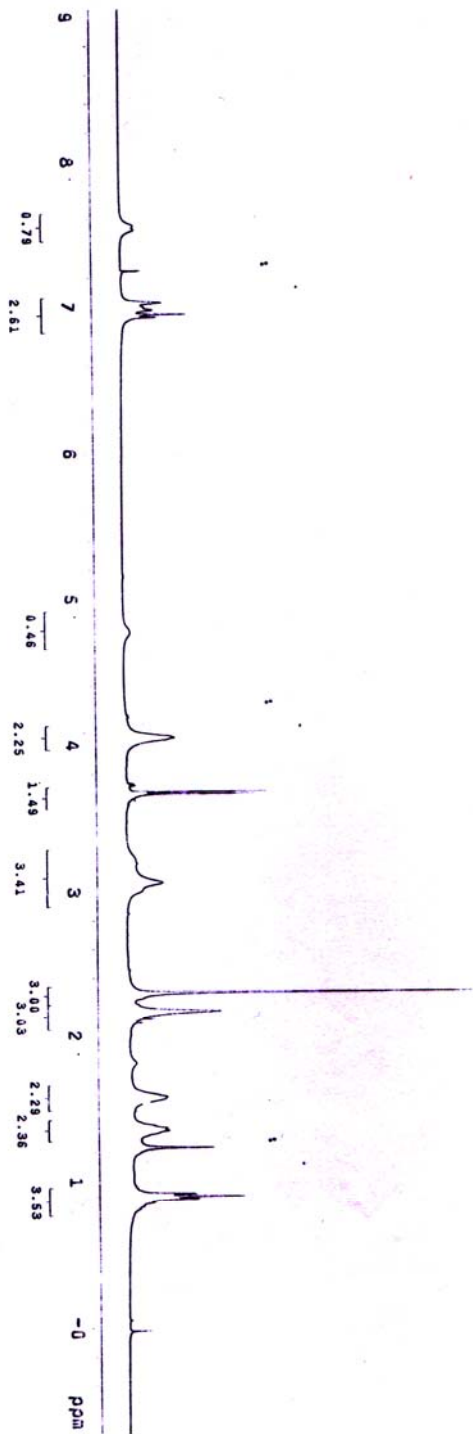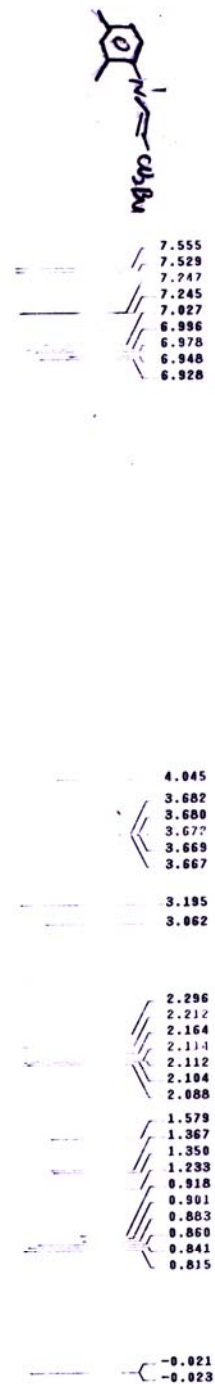

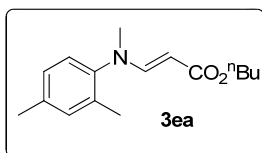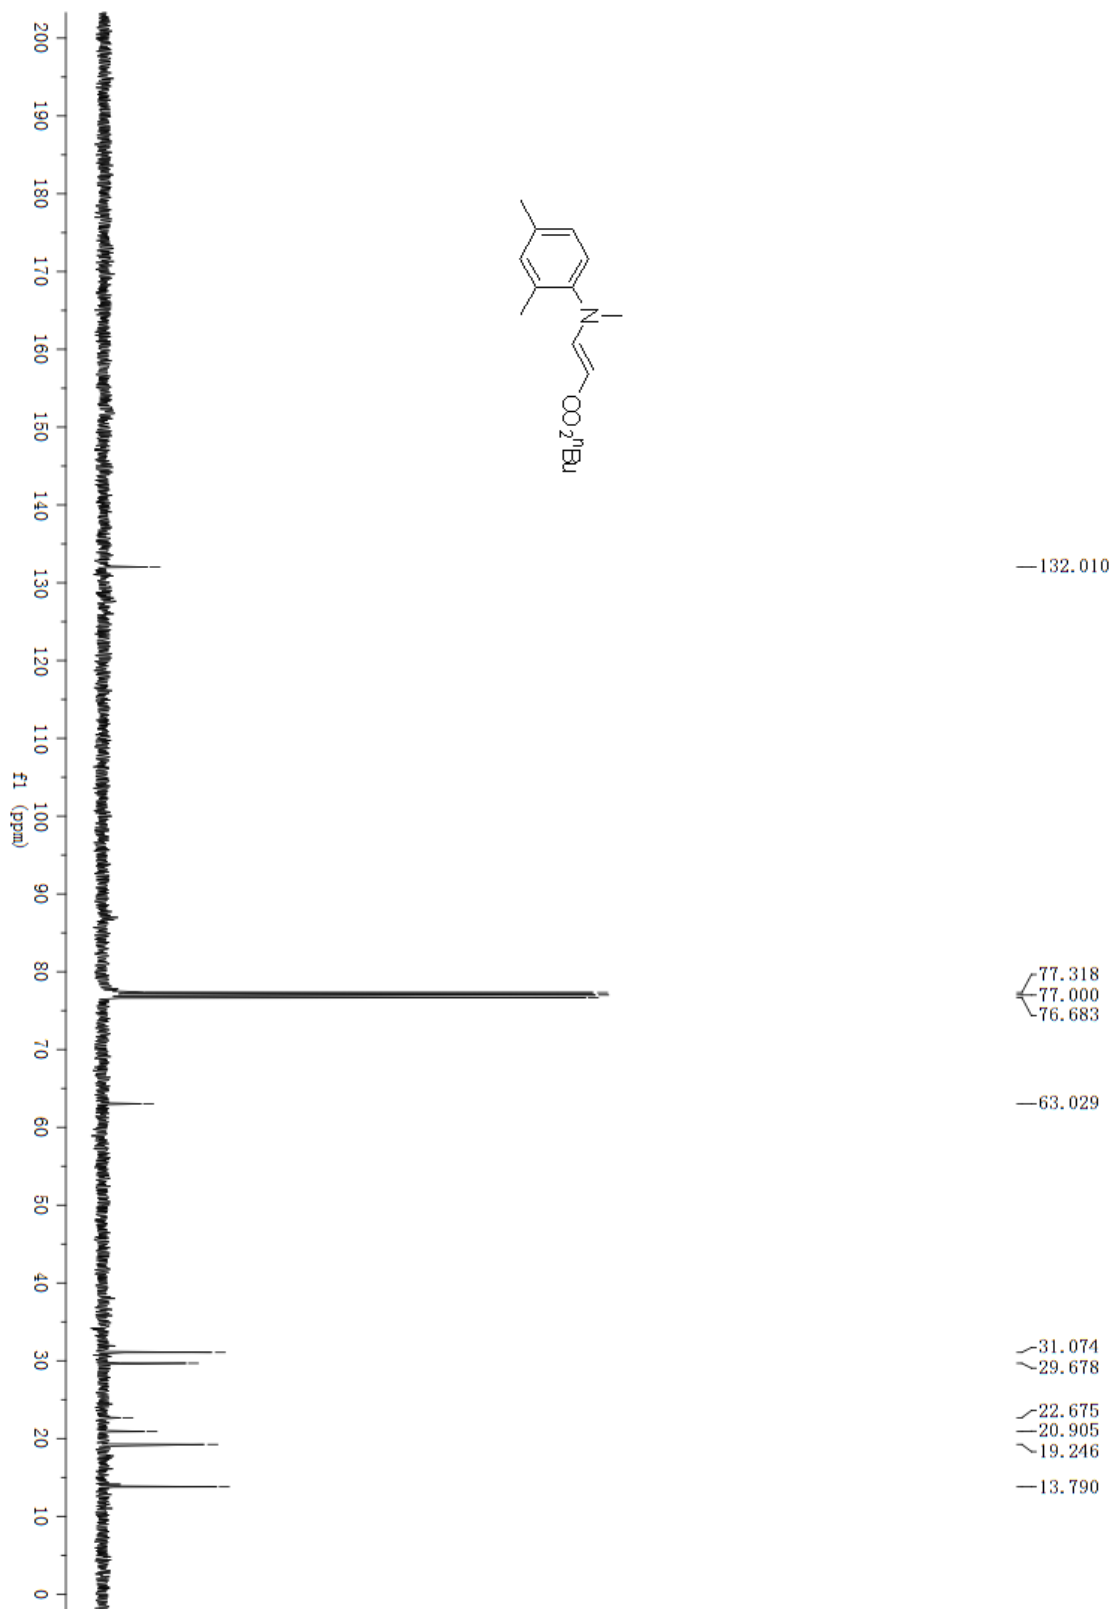

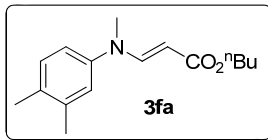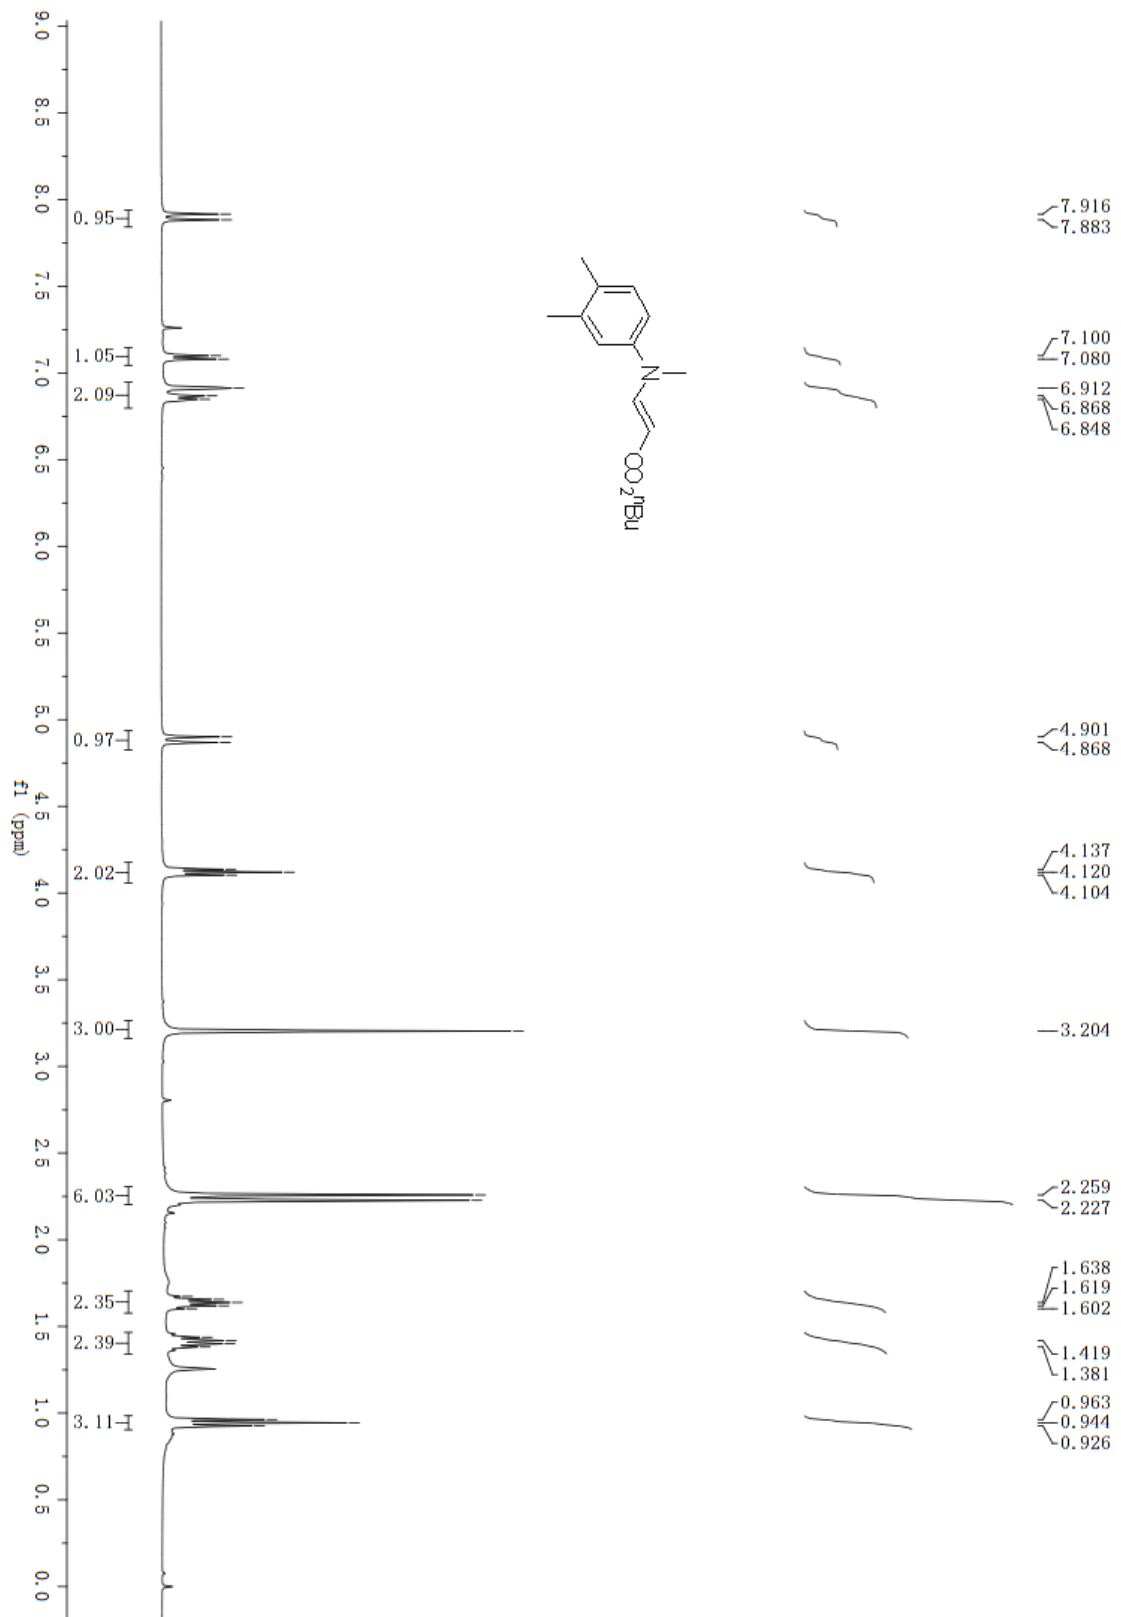

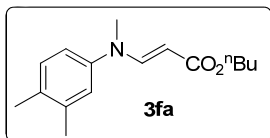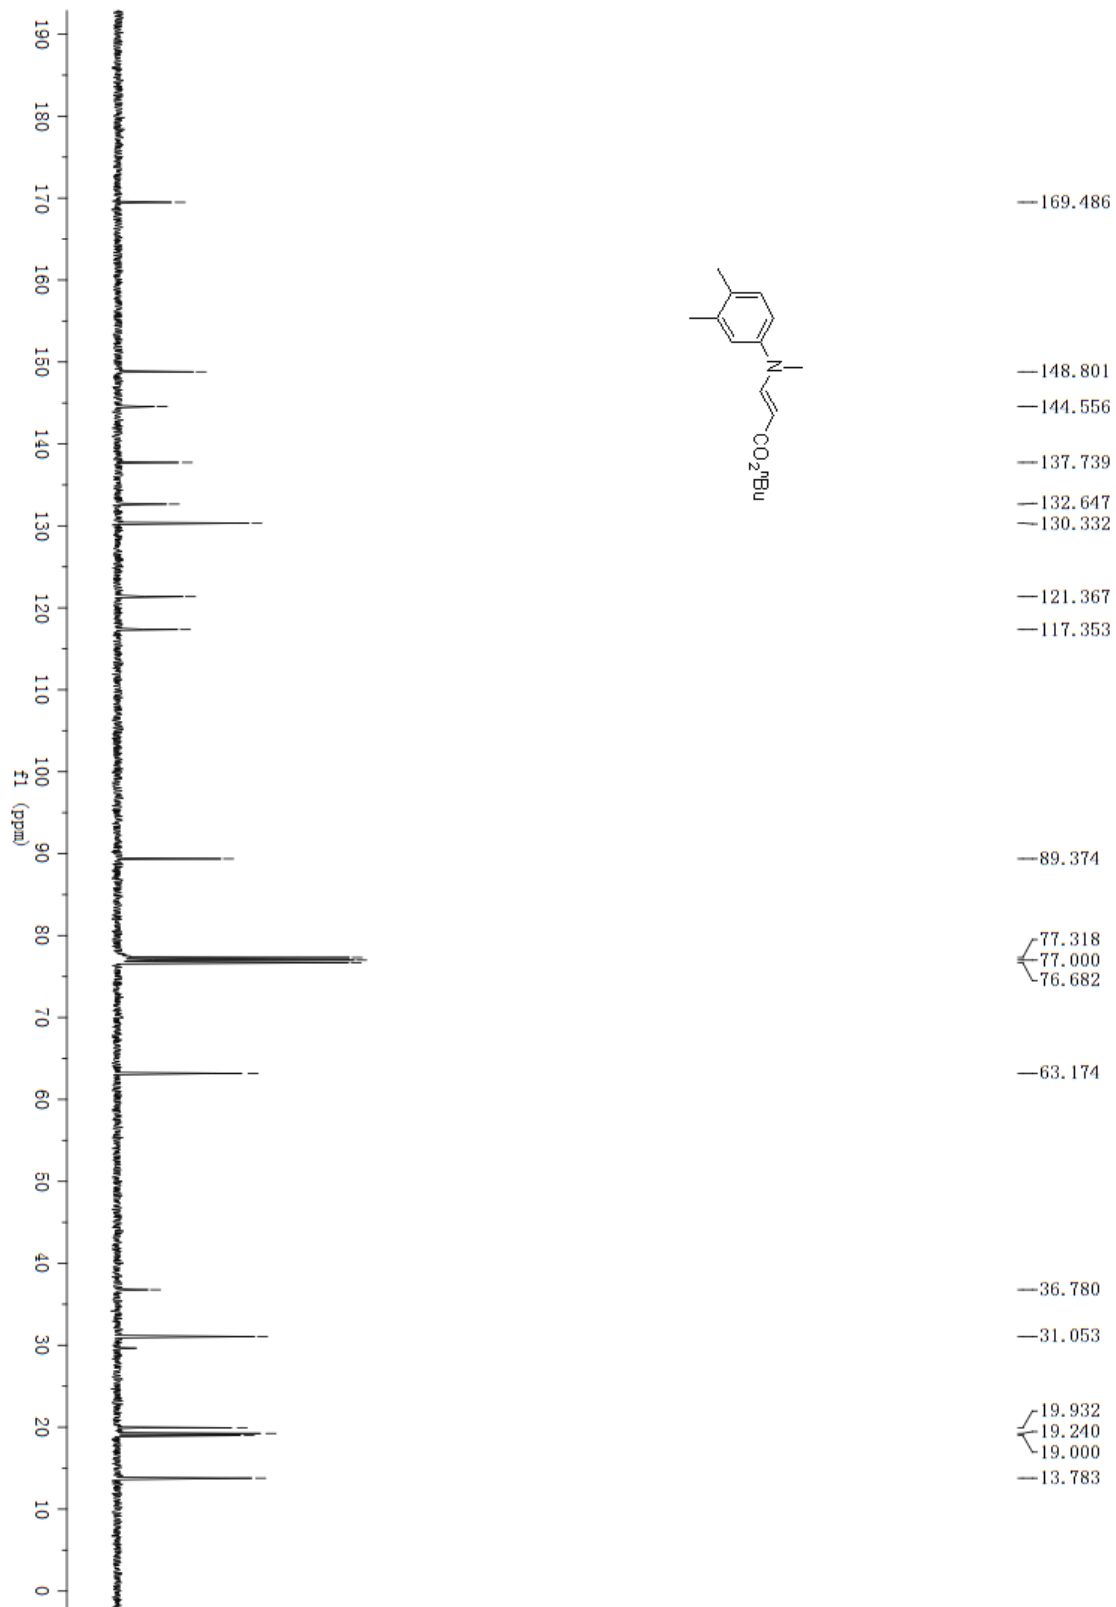

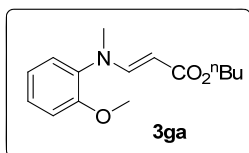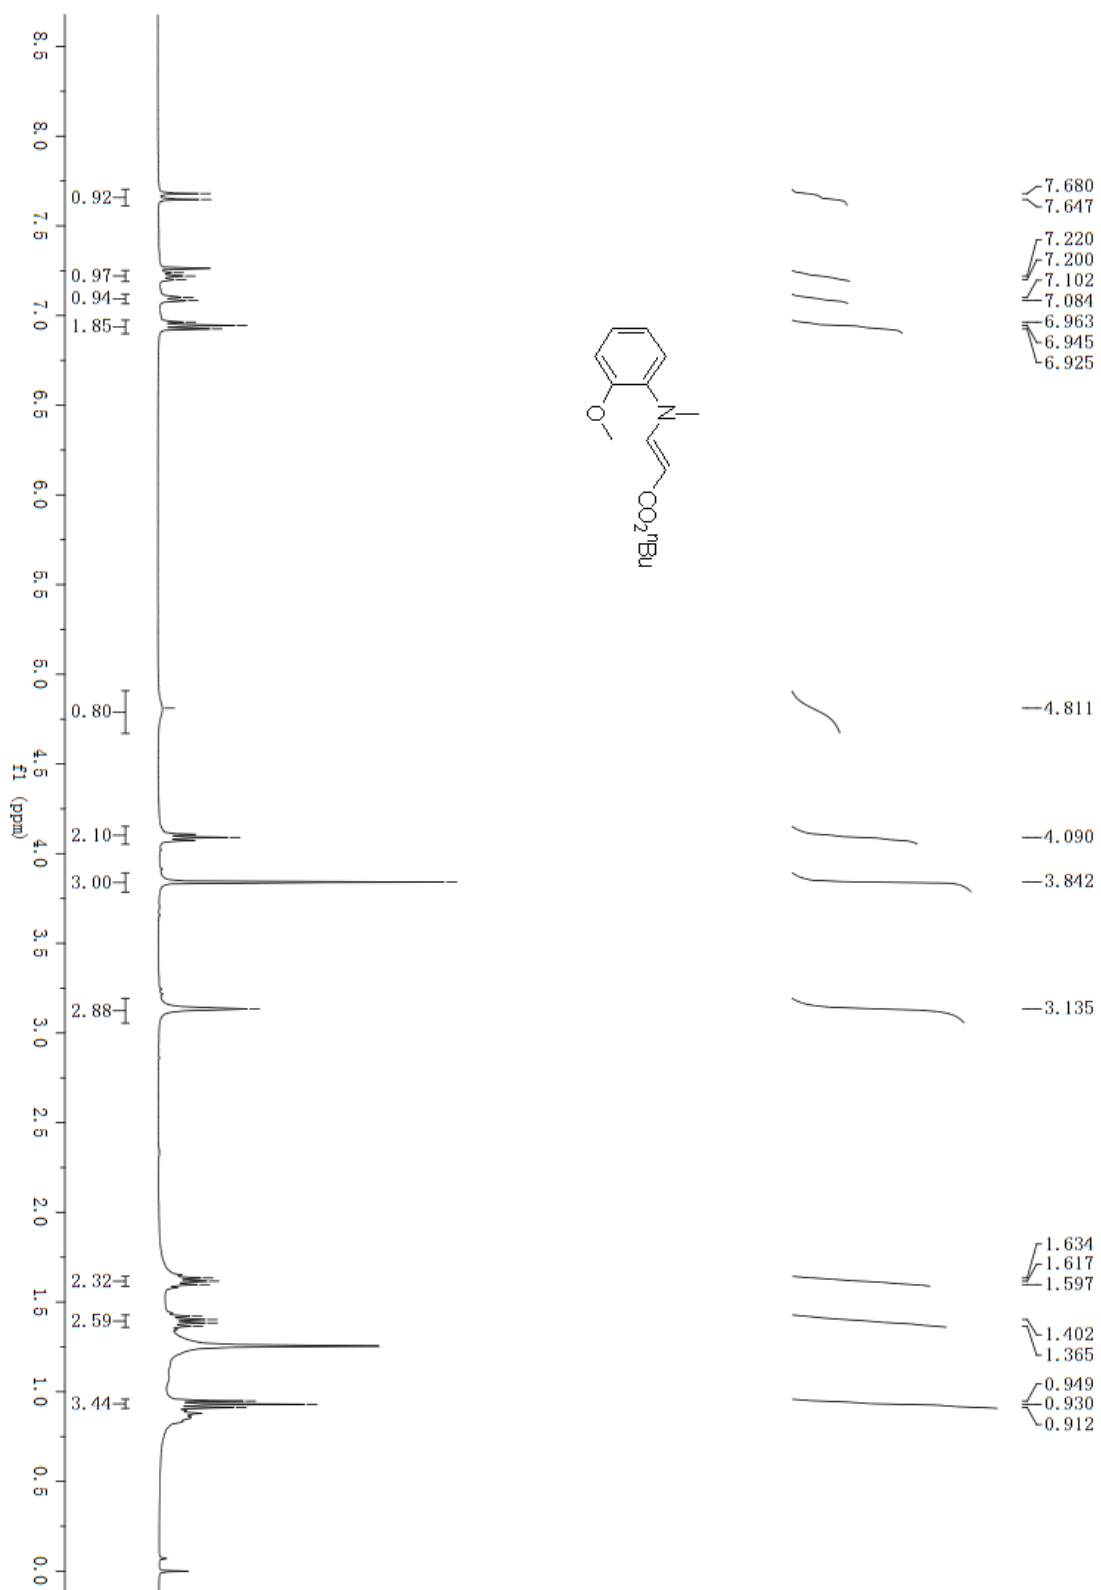

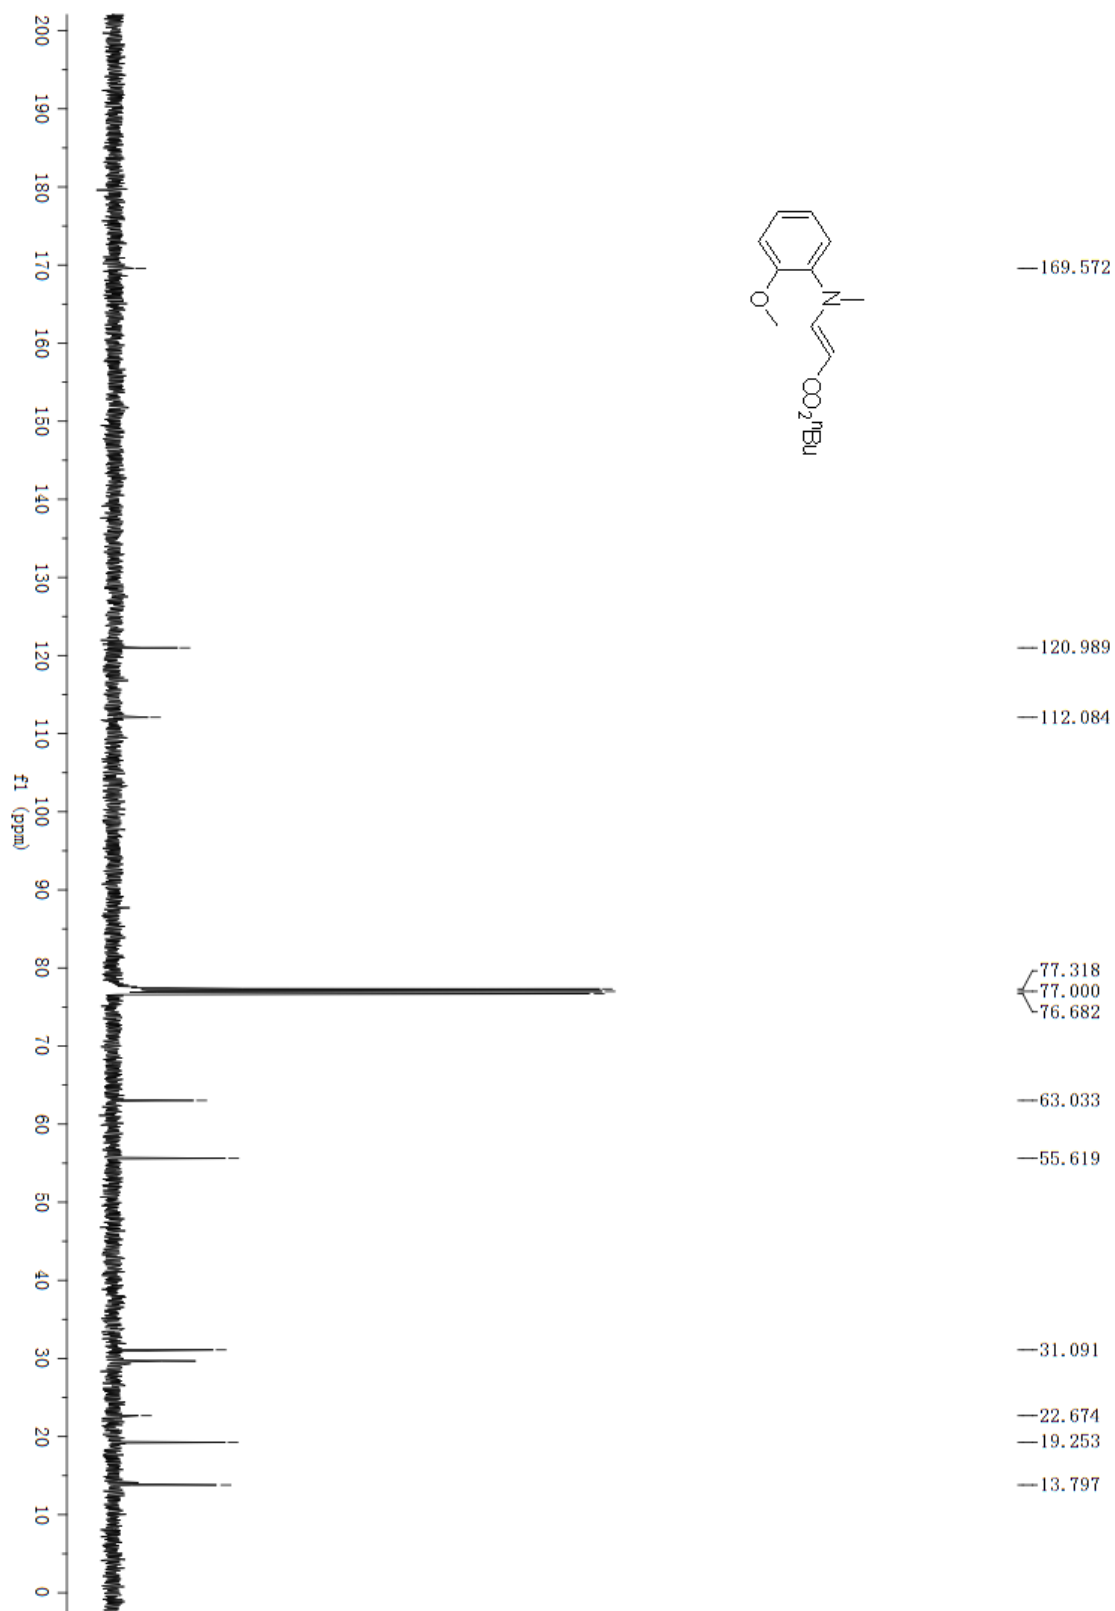



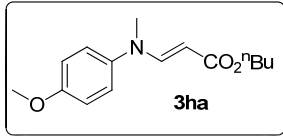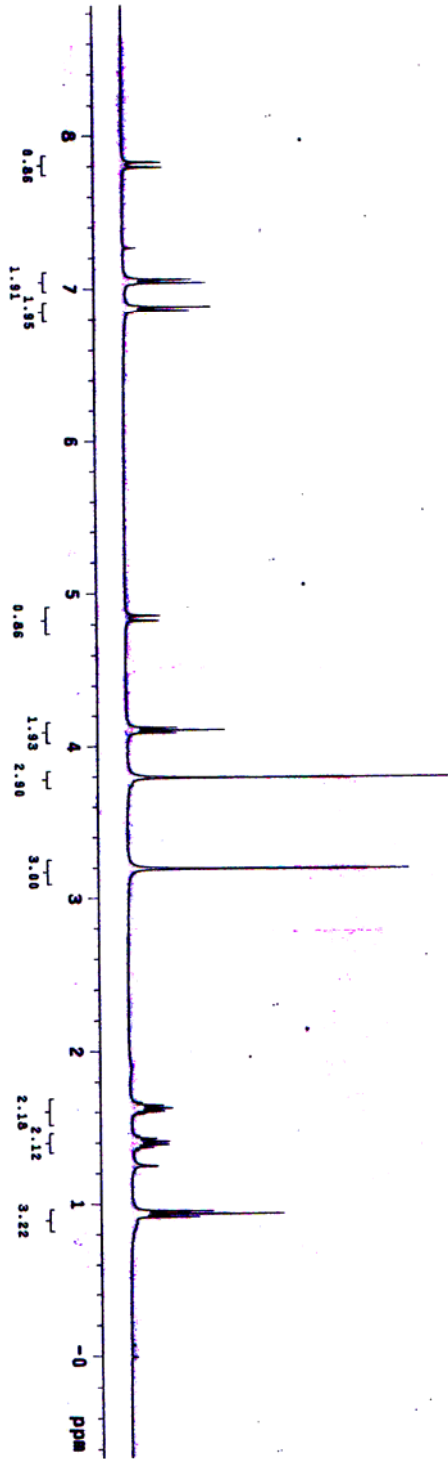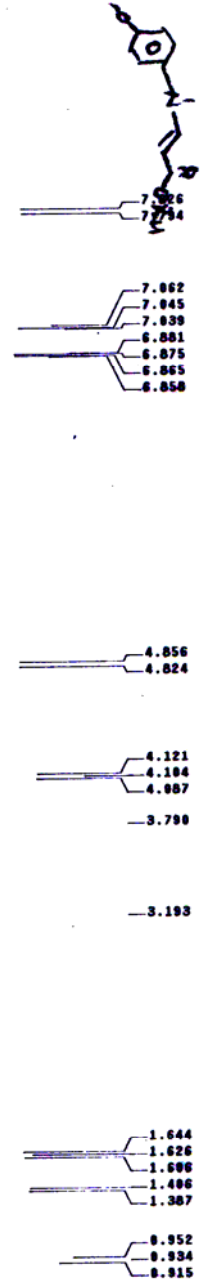

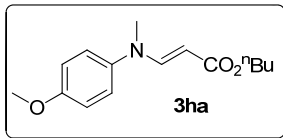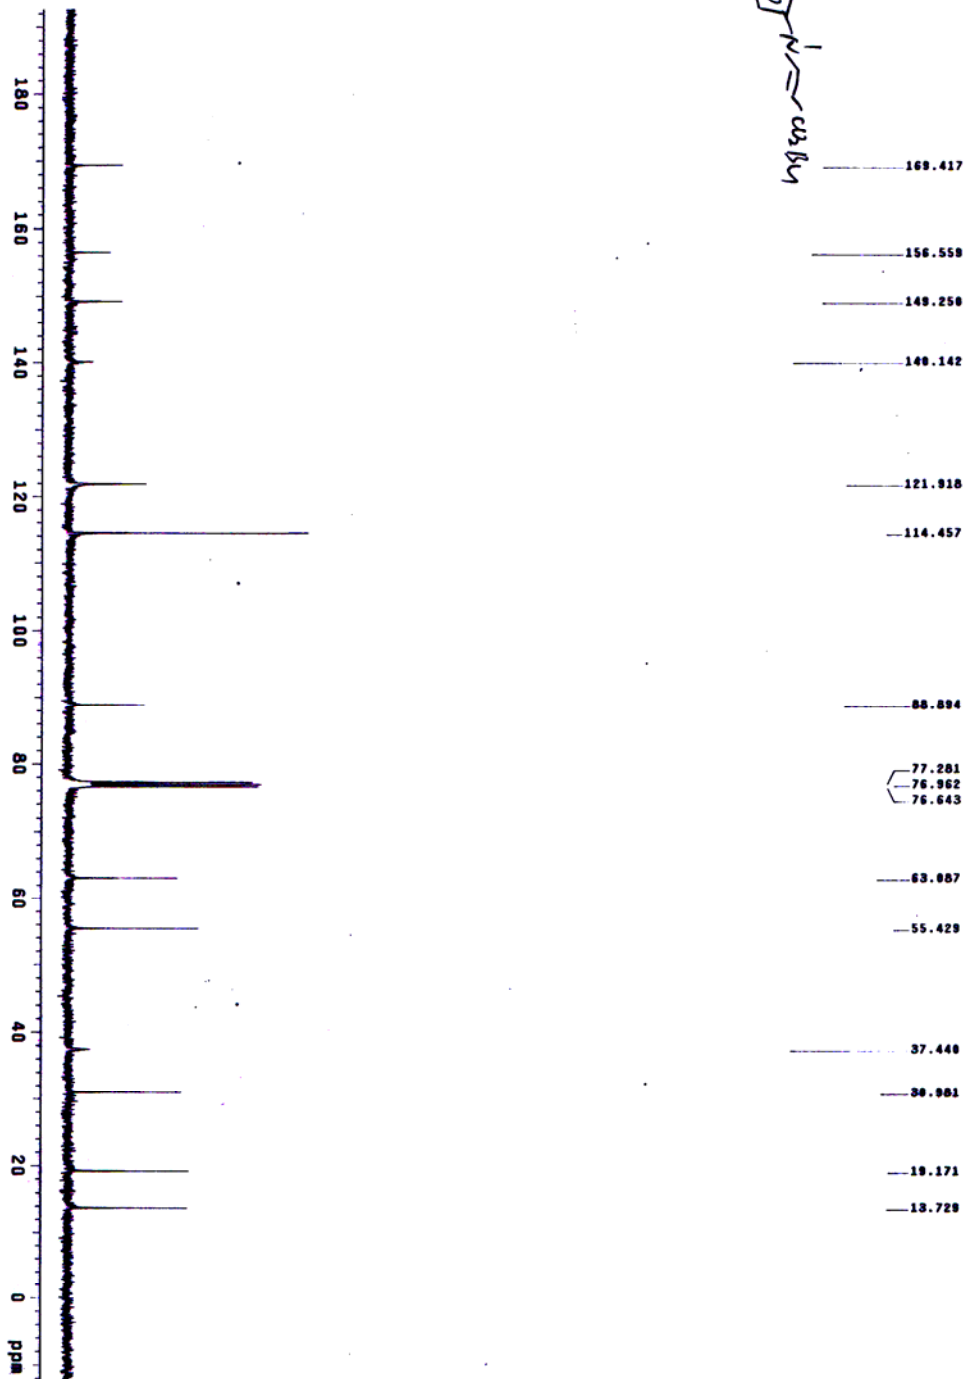

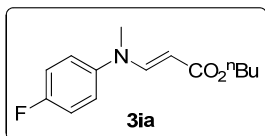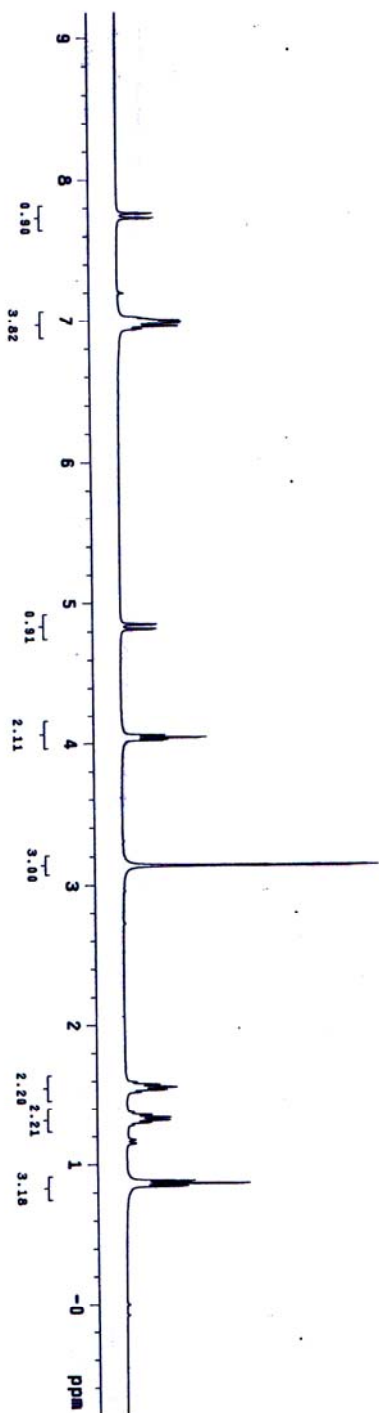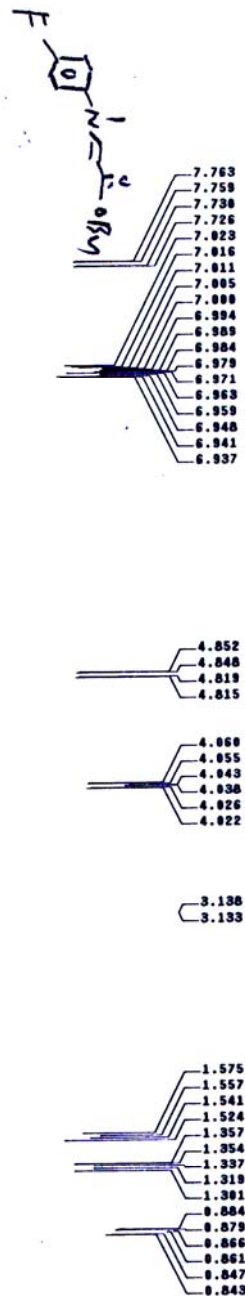

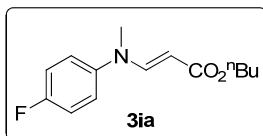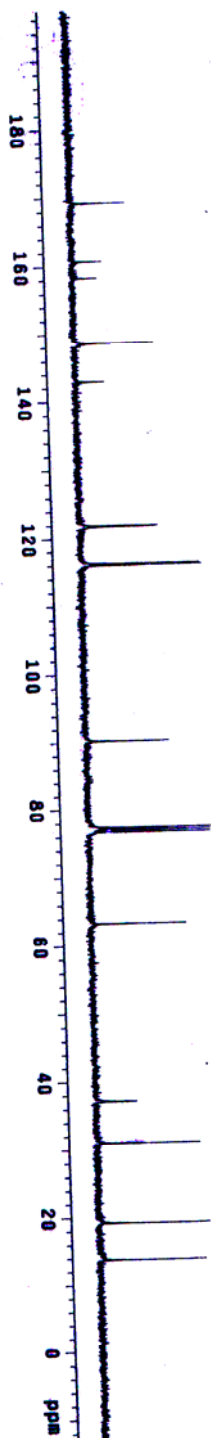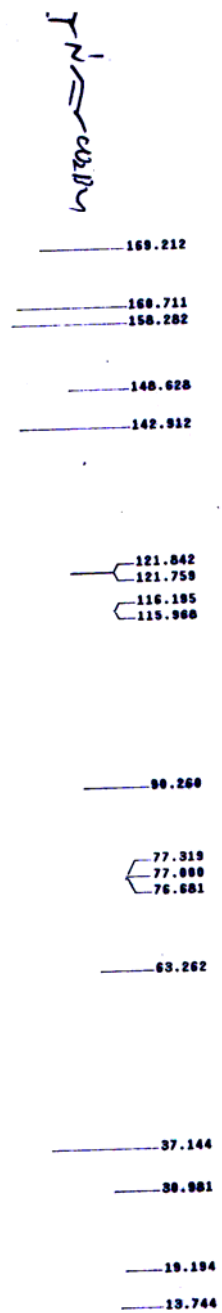

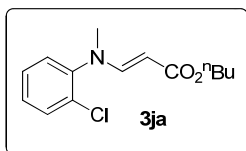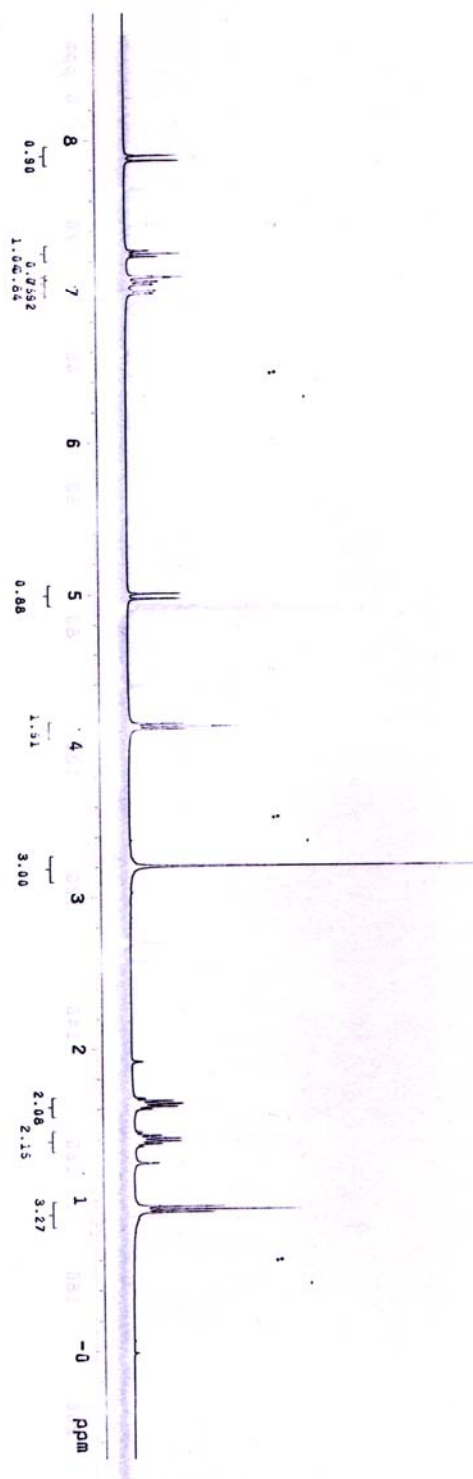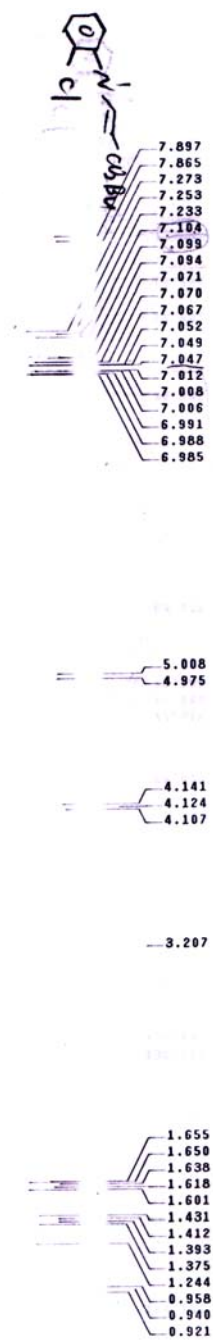

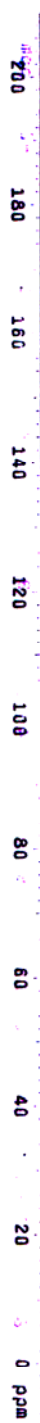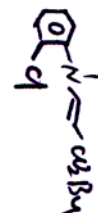

169.182

130.753  
127.928

89.015

77.319  
77.000  
76.681

63.178

30.989

19.201

13.799

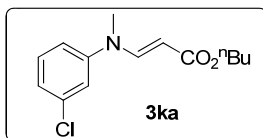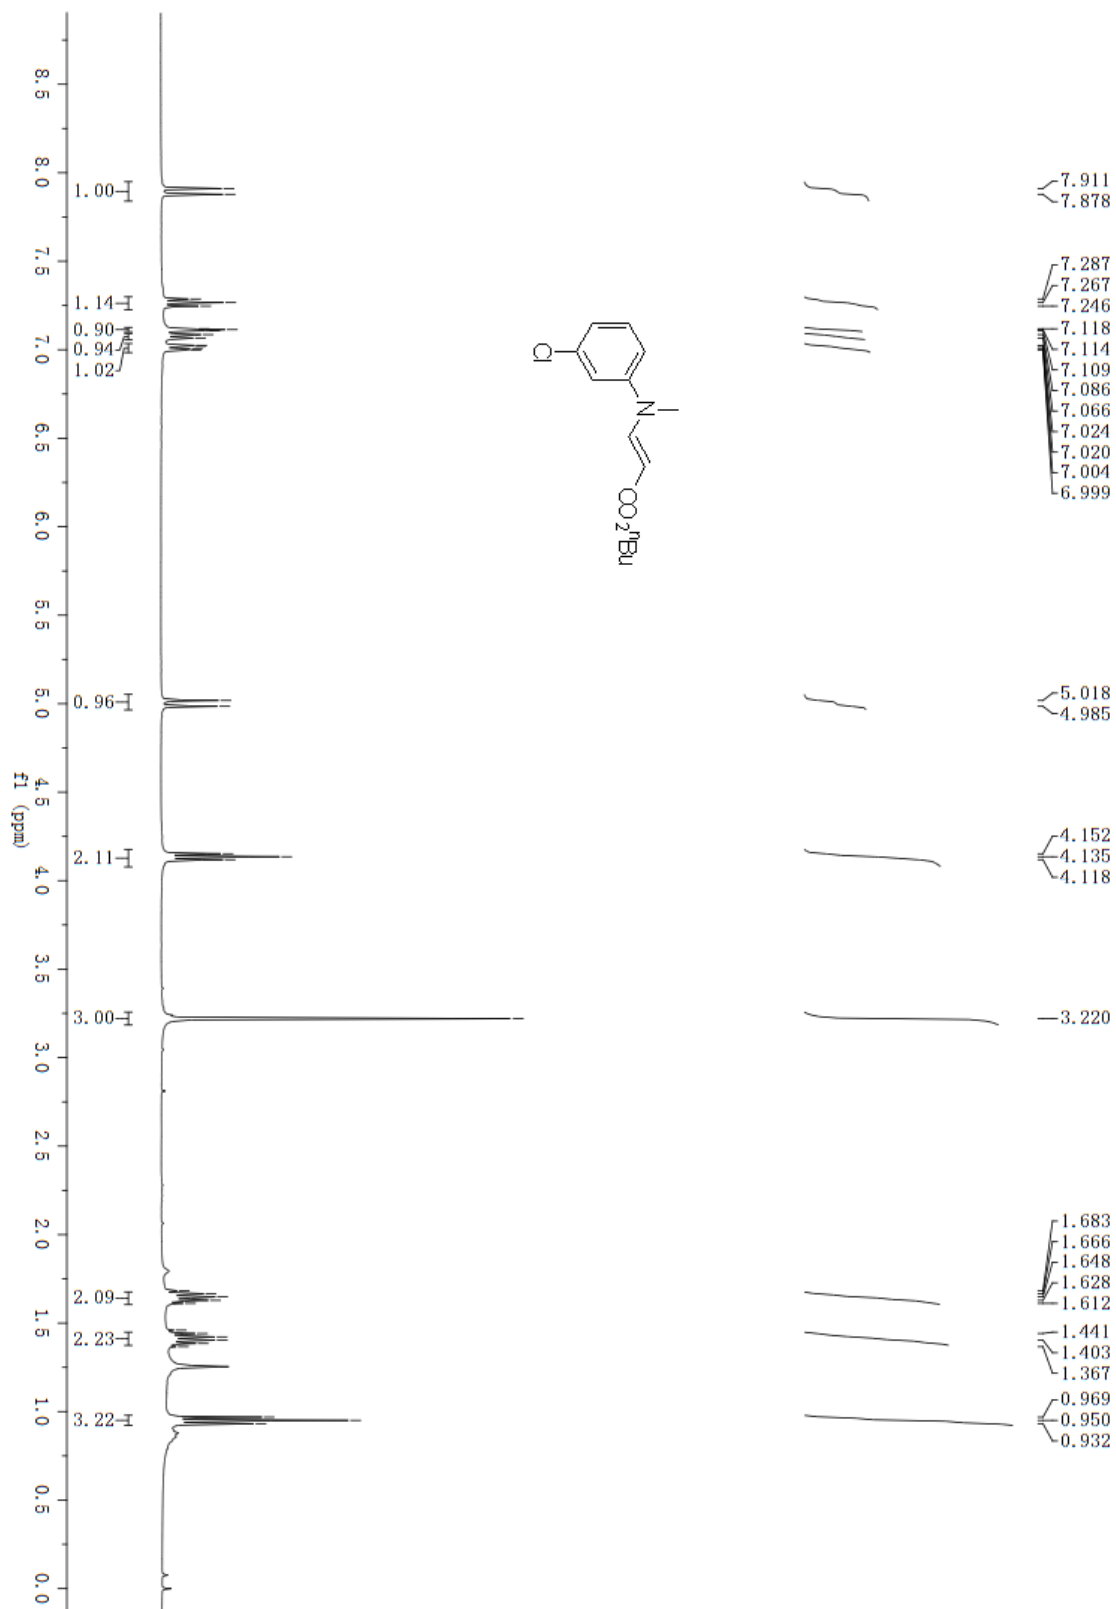

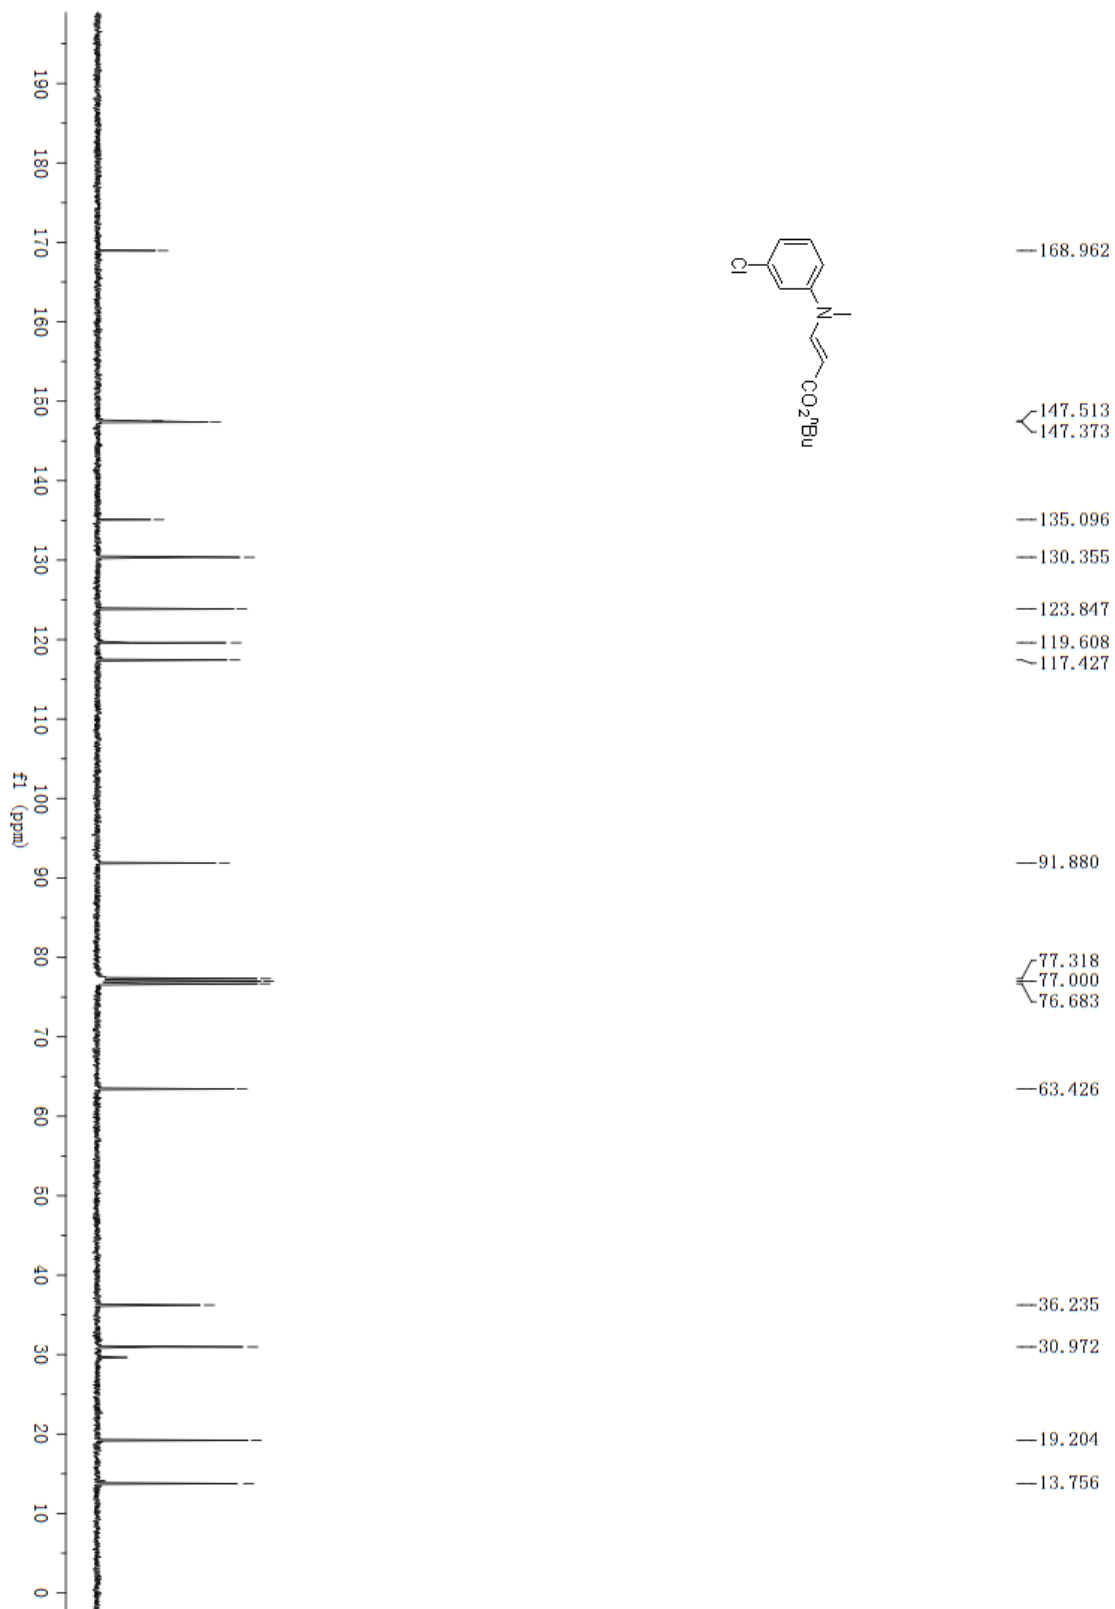



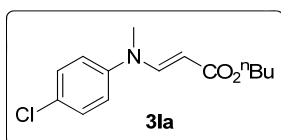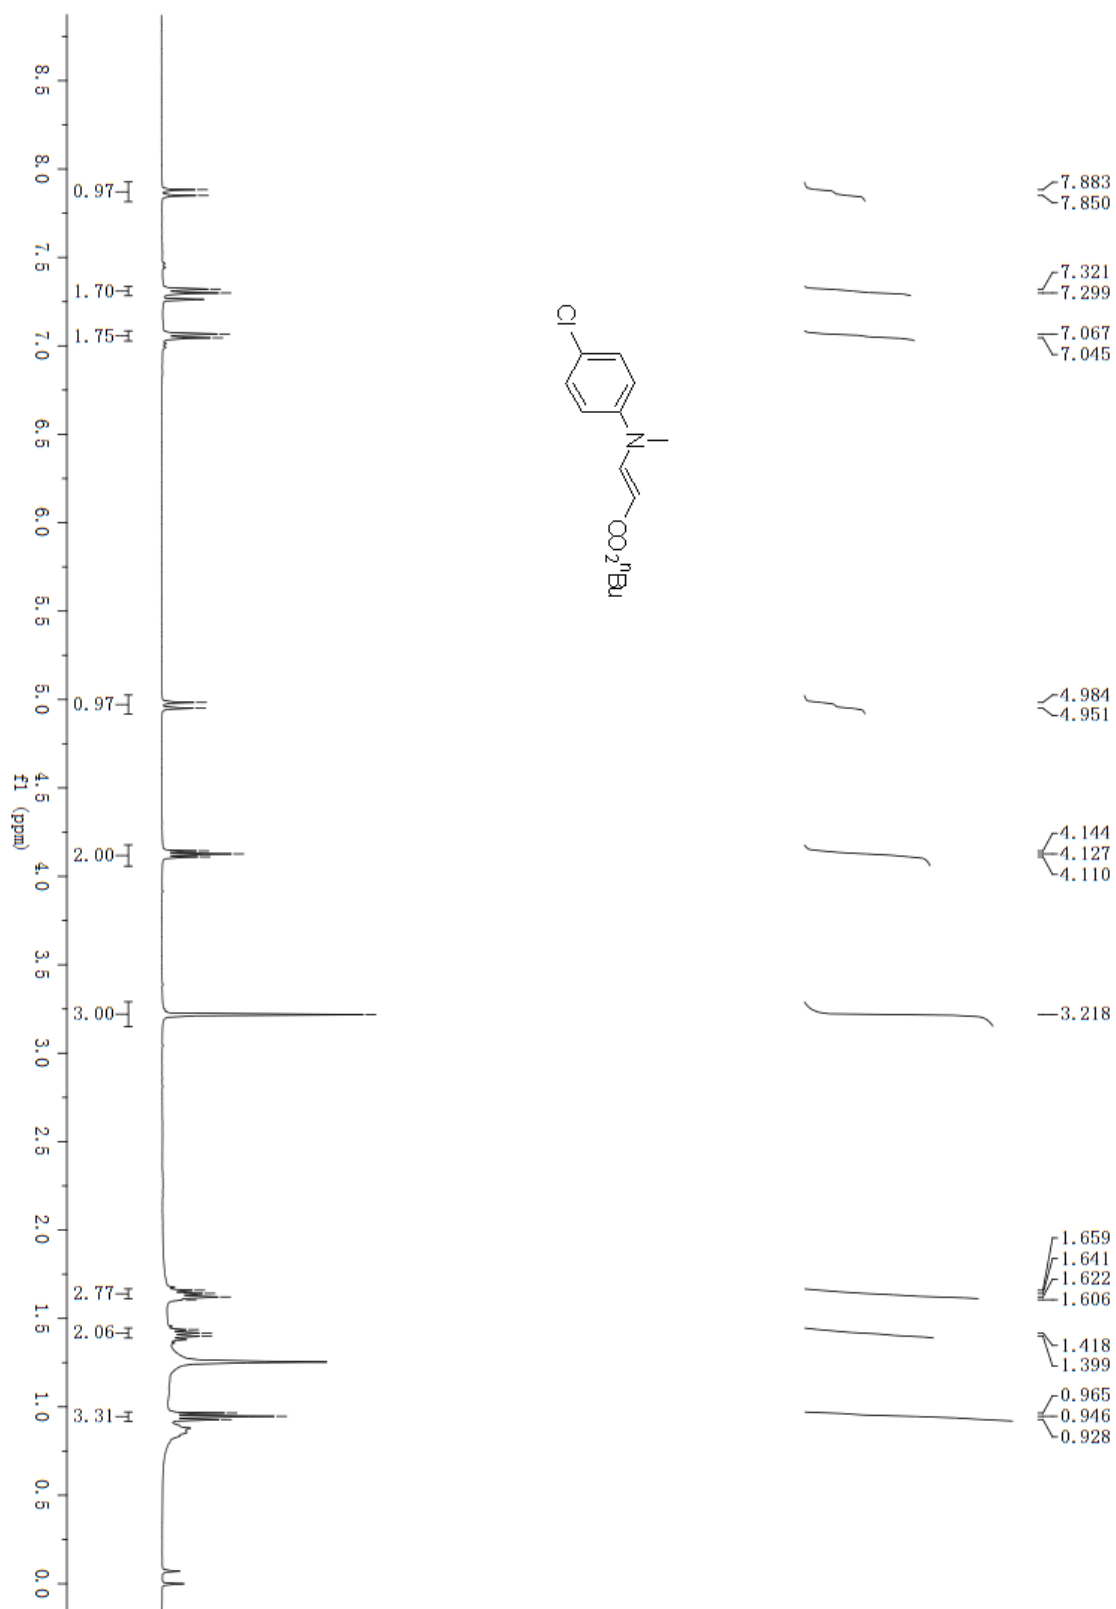

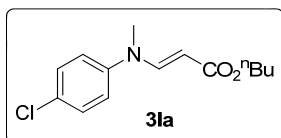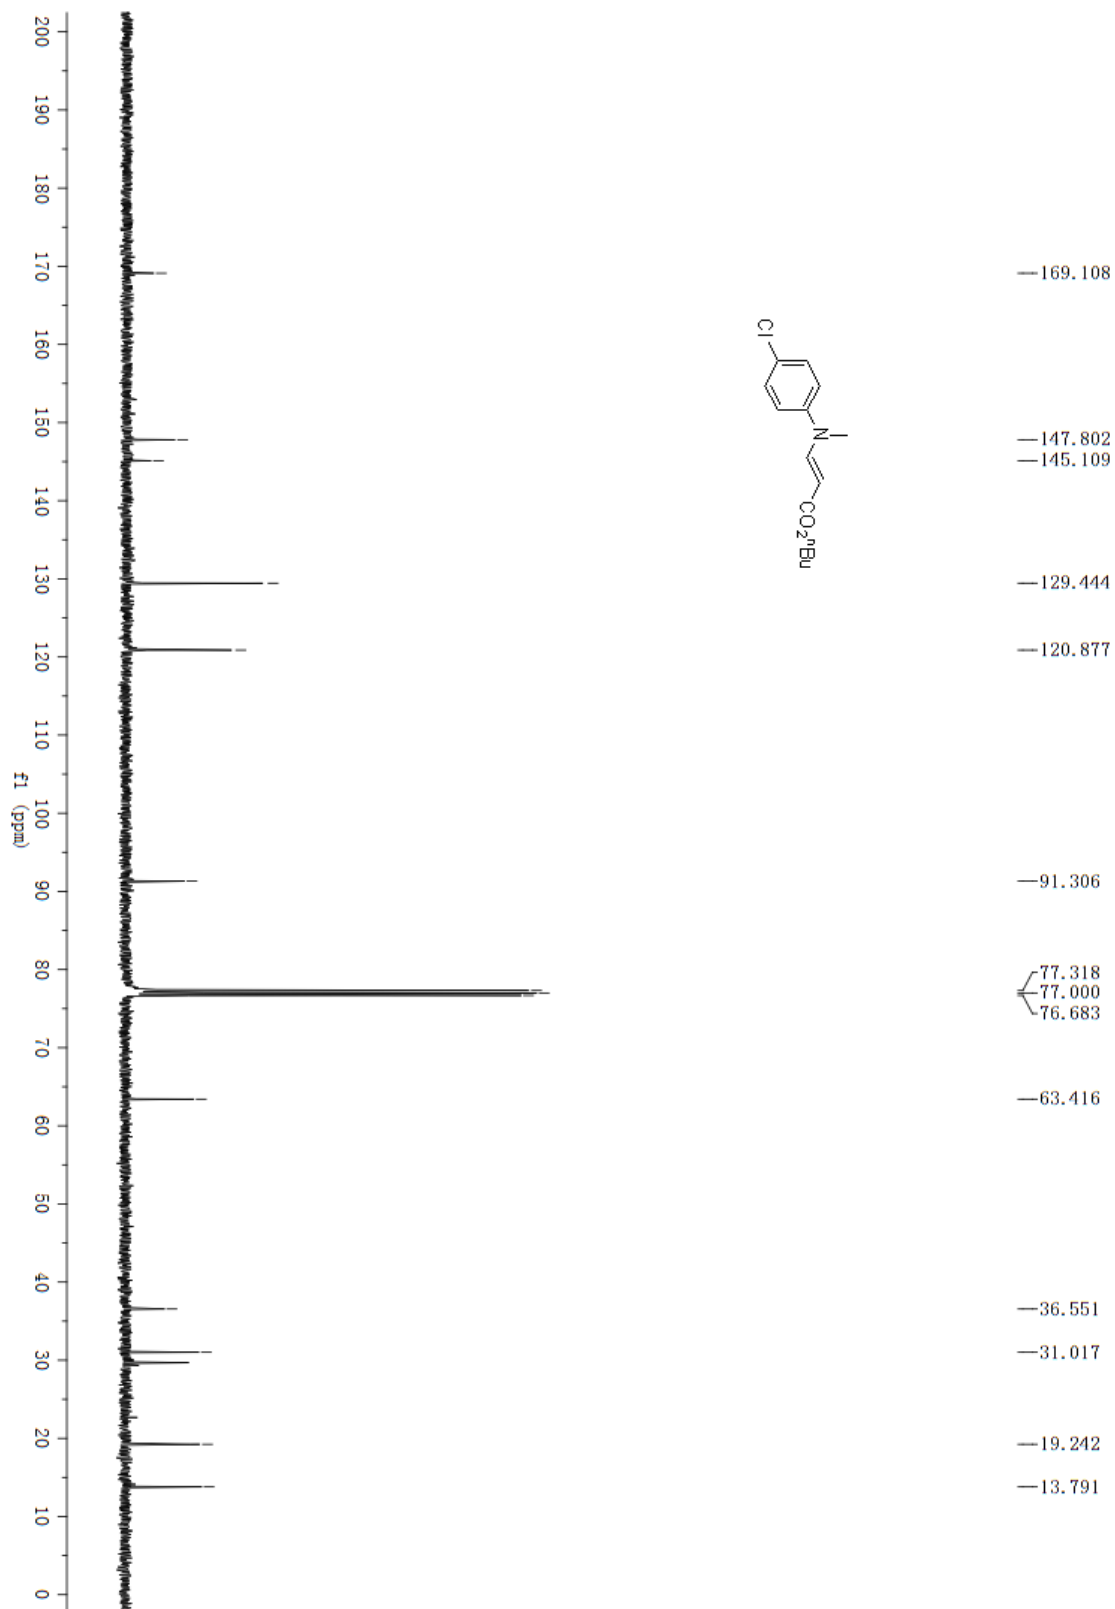

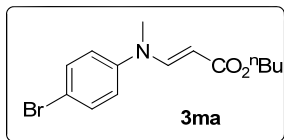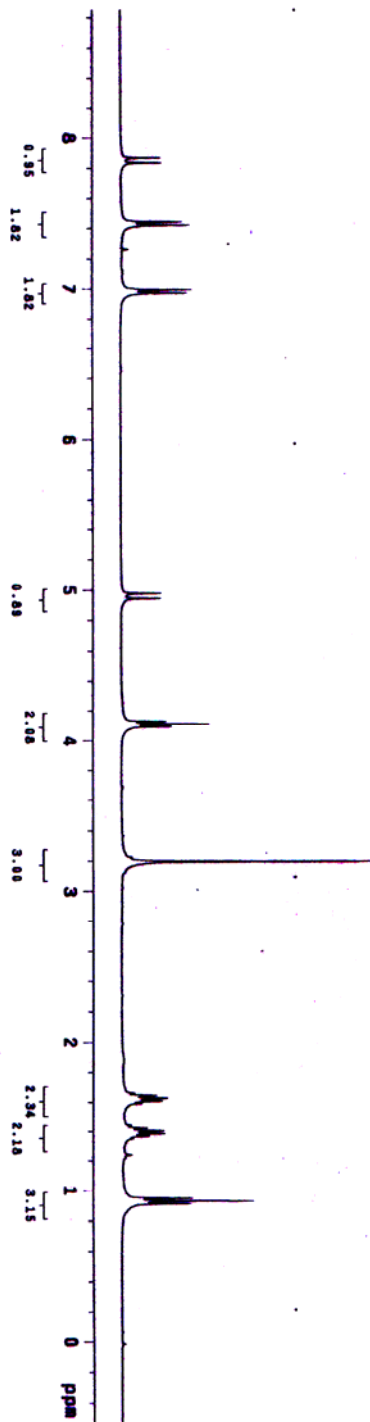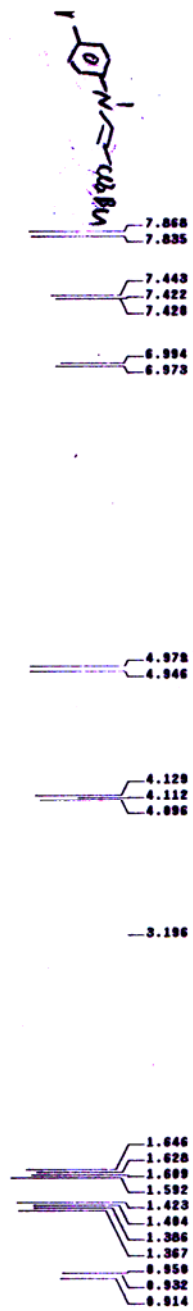

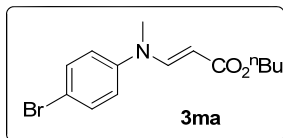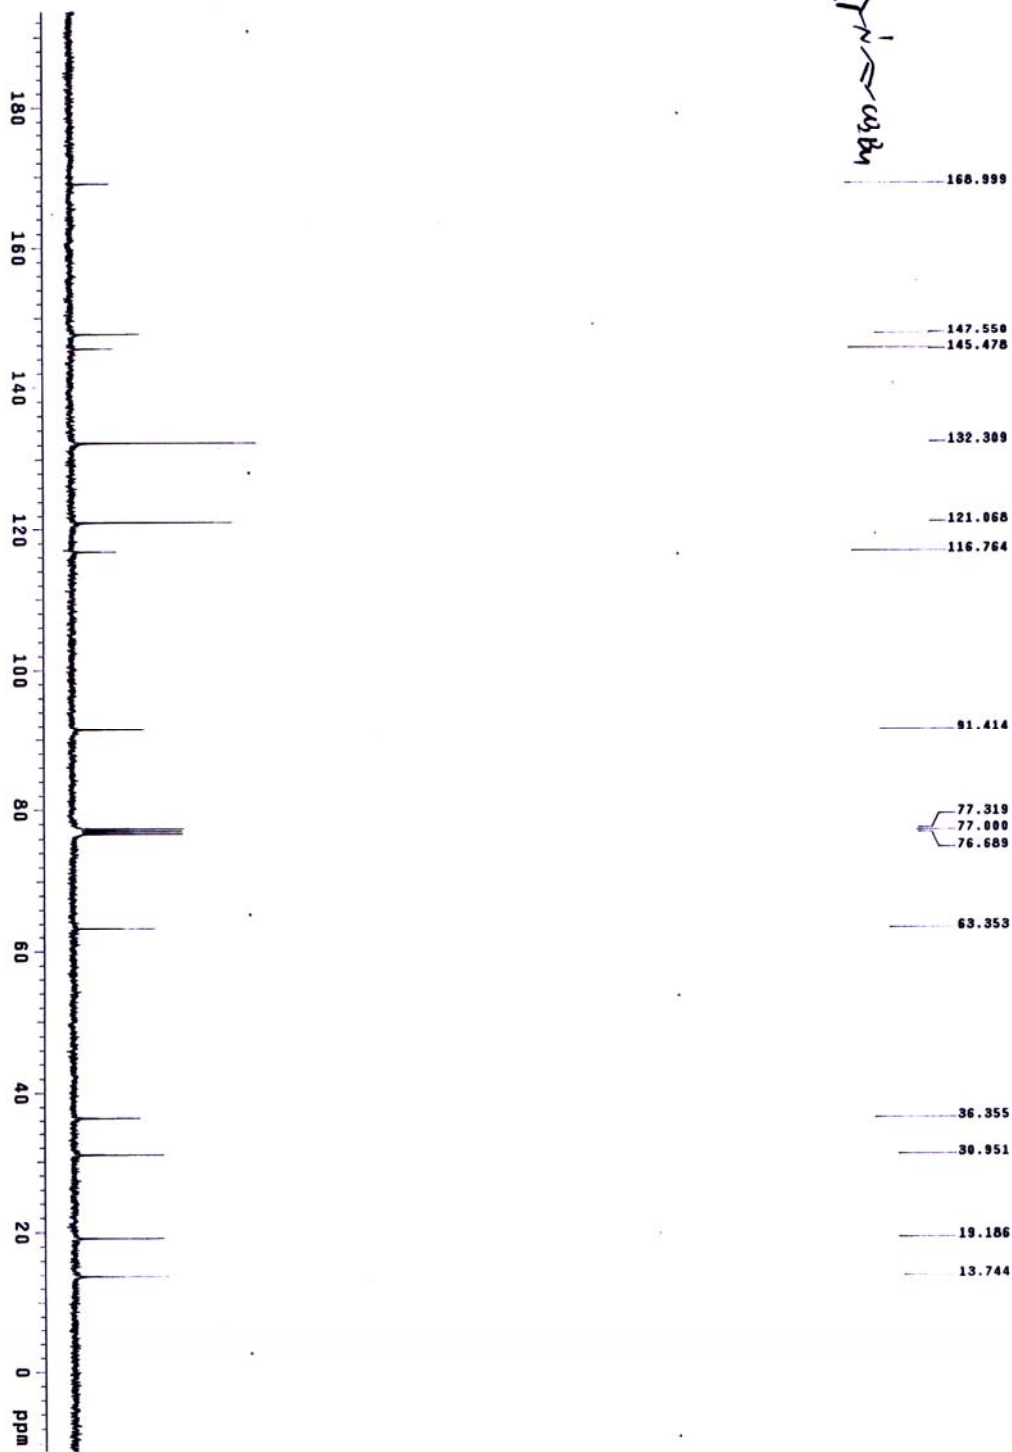

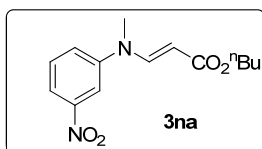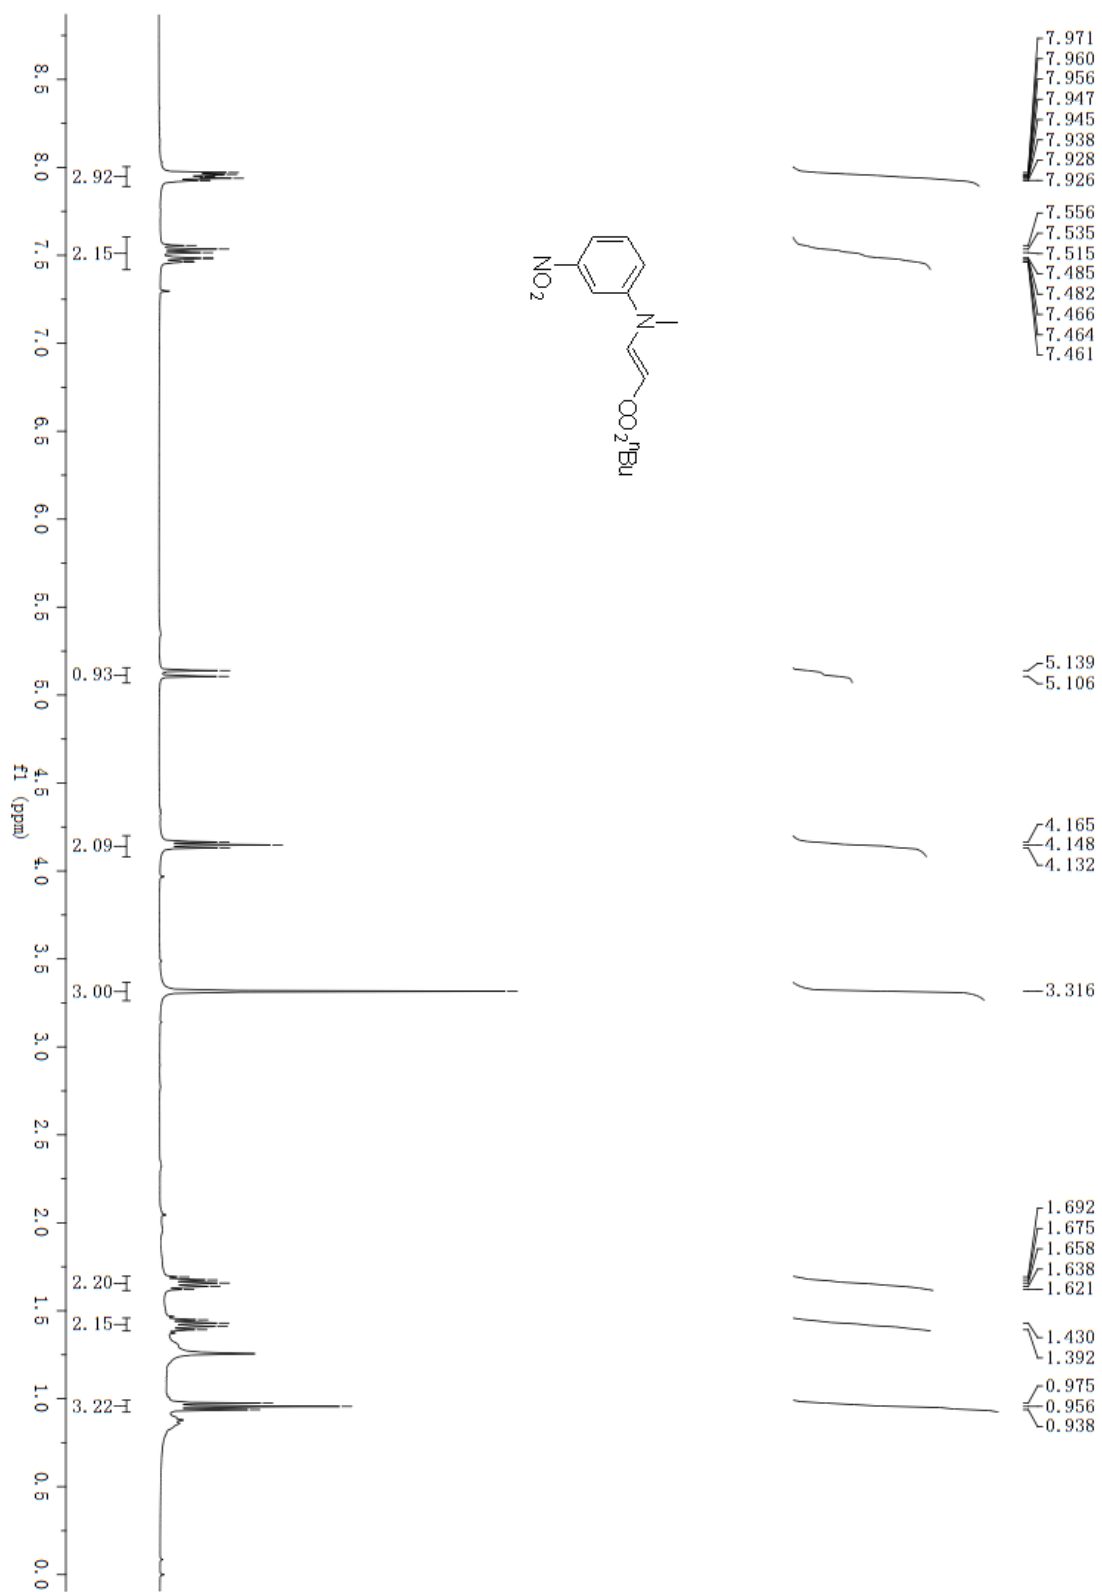

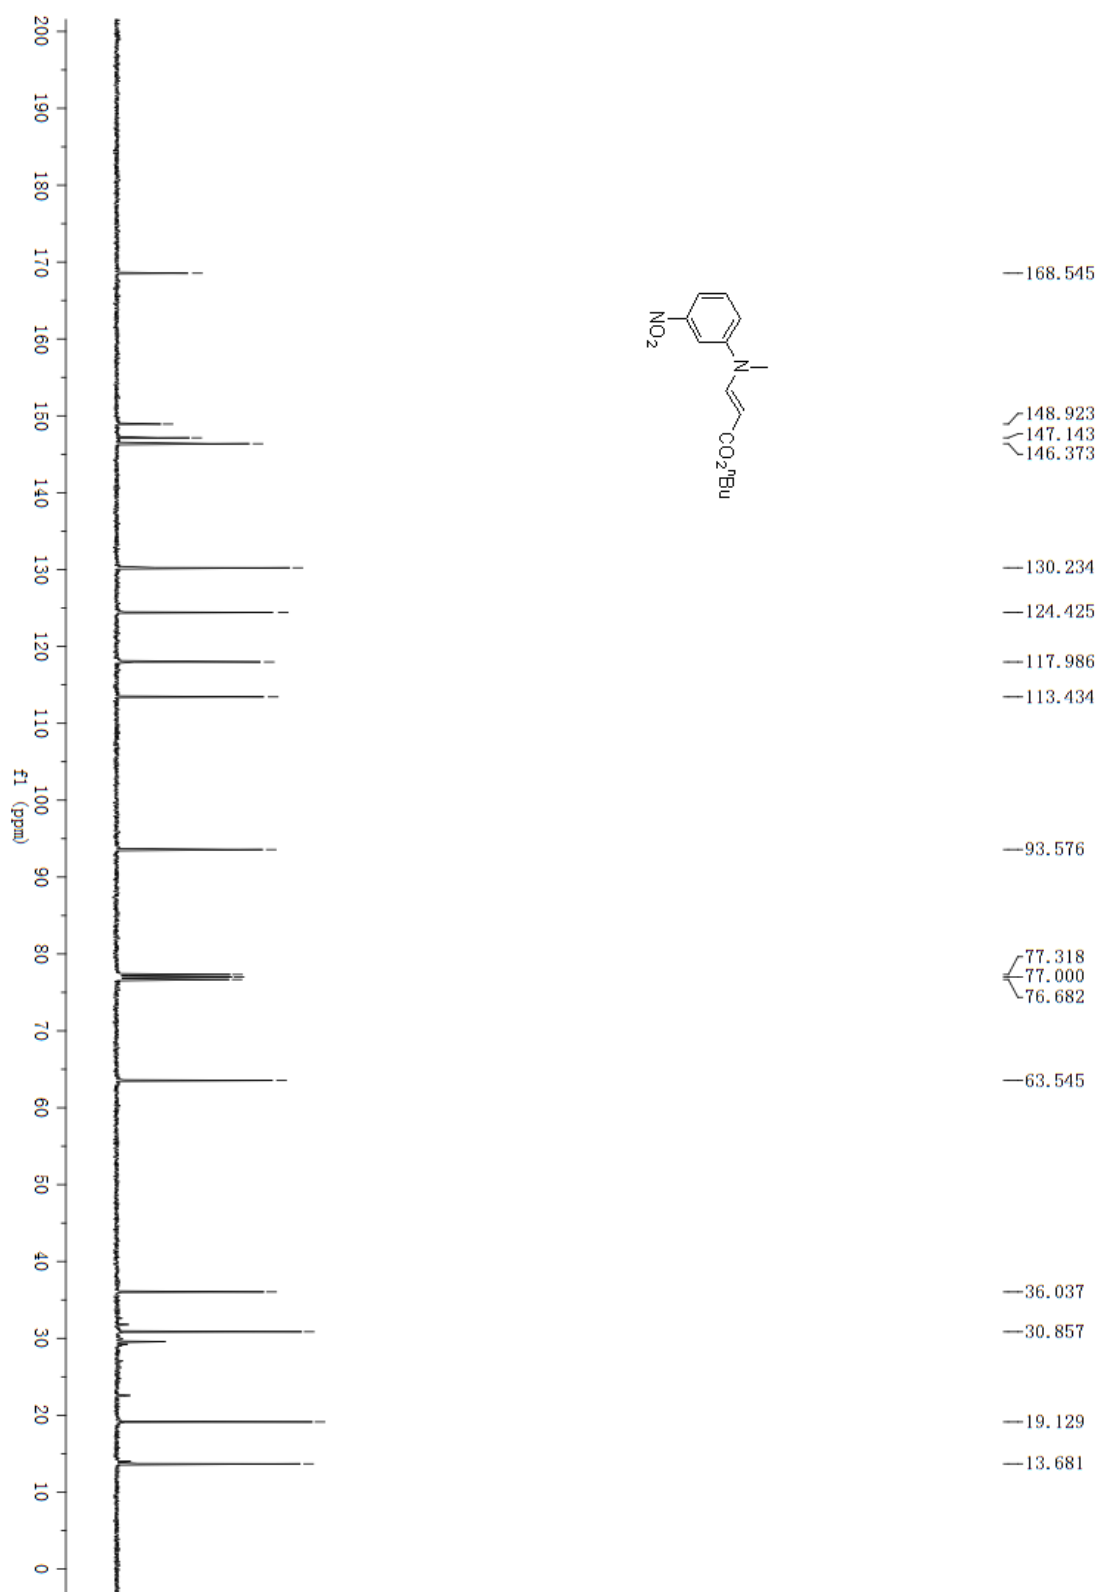

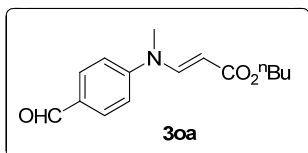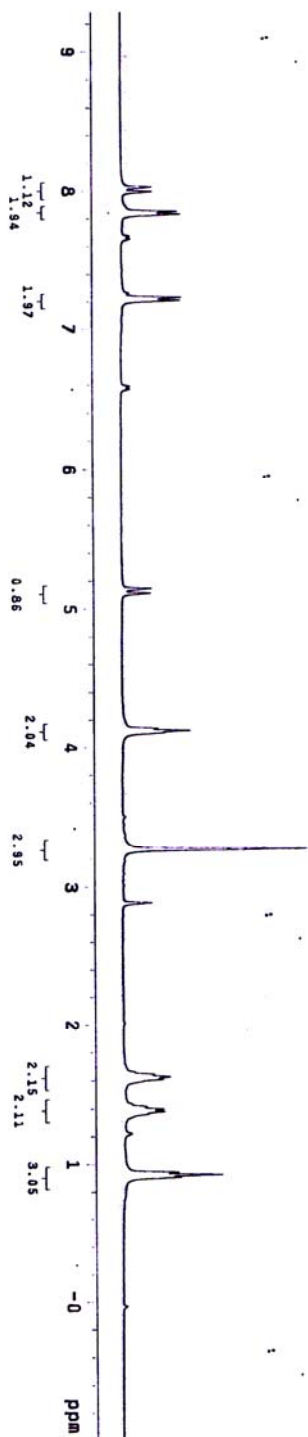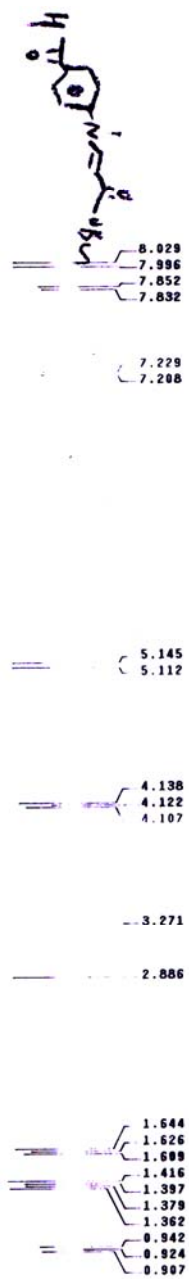

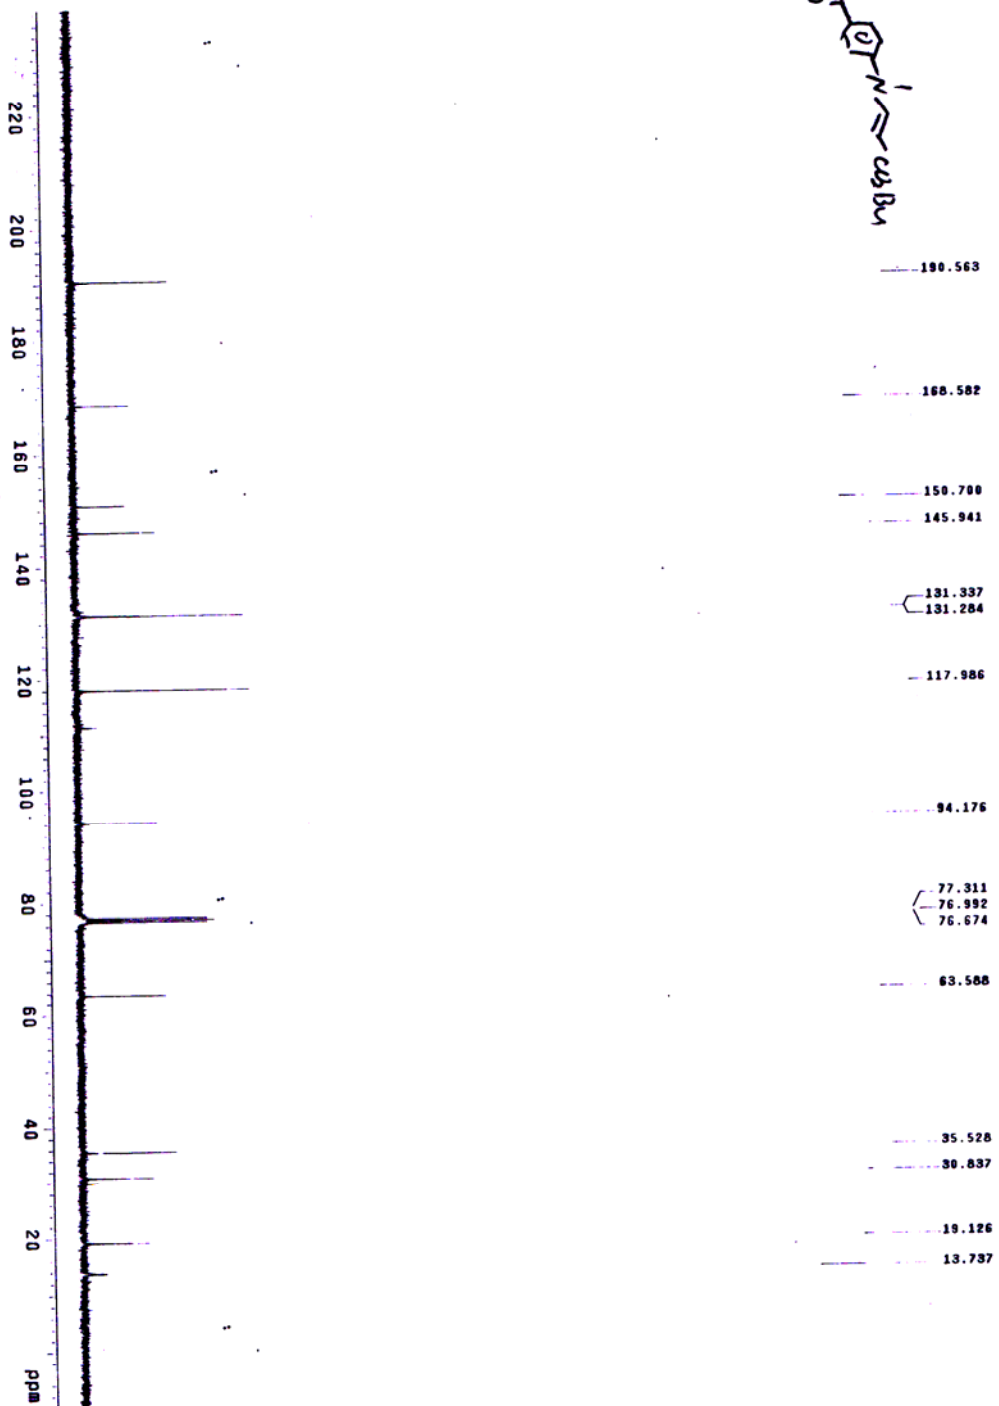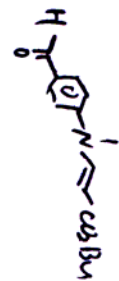



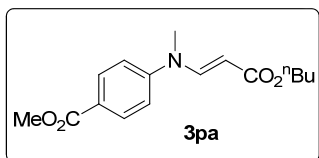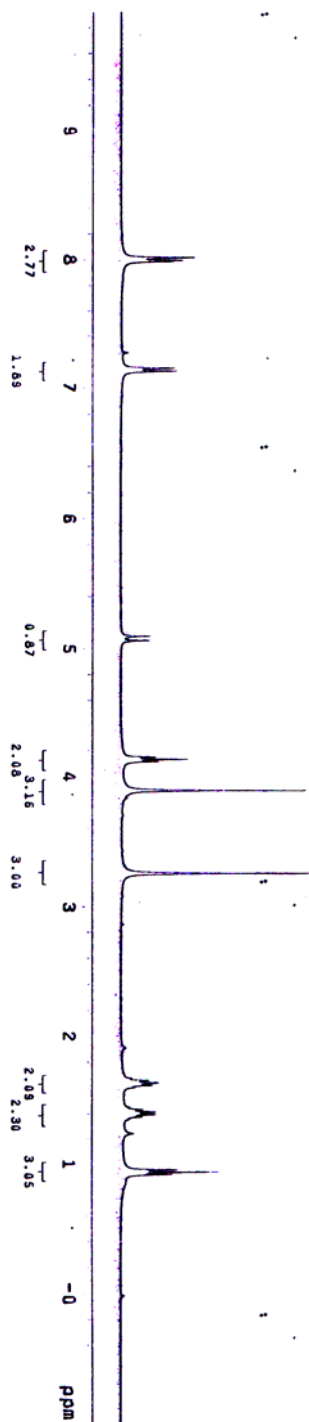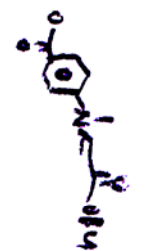

8.018  
7.995  
7.987

7.153  
7.132

5.897  
5.064

4.149  
4.132  
4.116  
3.891

3.260

1.658  
1.641  
1.621  
1.432  
1.413  
1.395  
1.376  
0.958  
0.941  
0.921

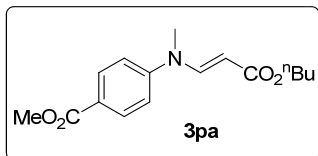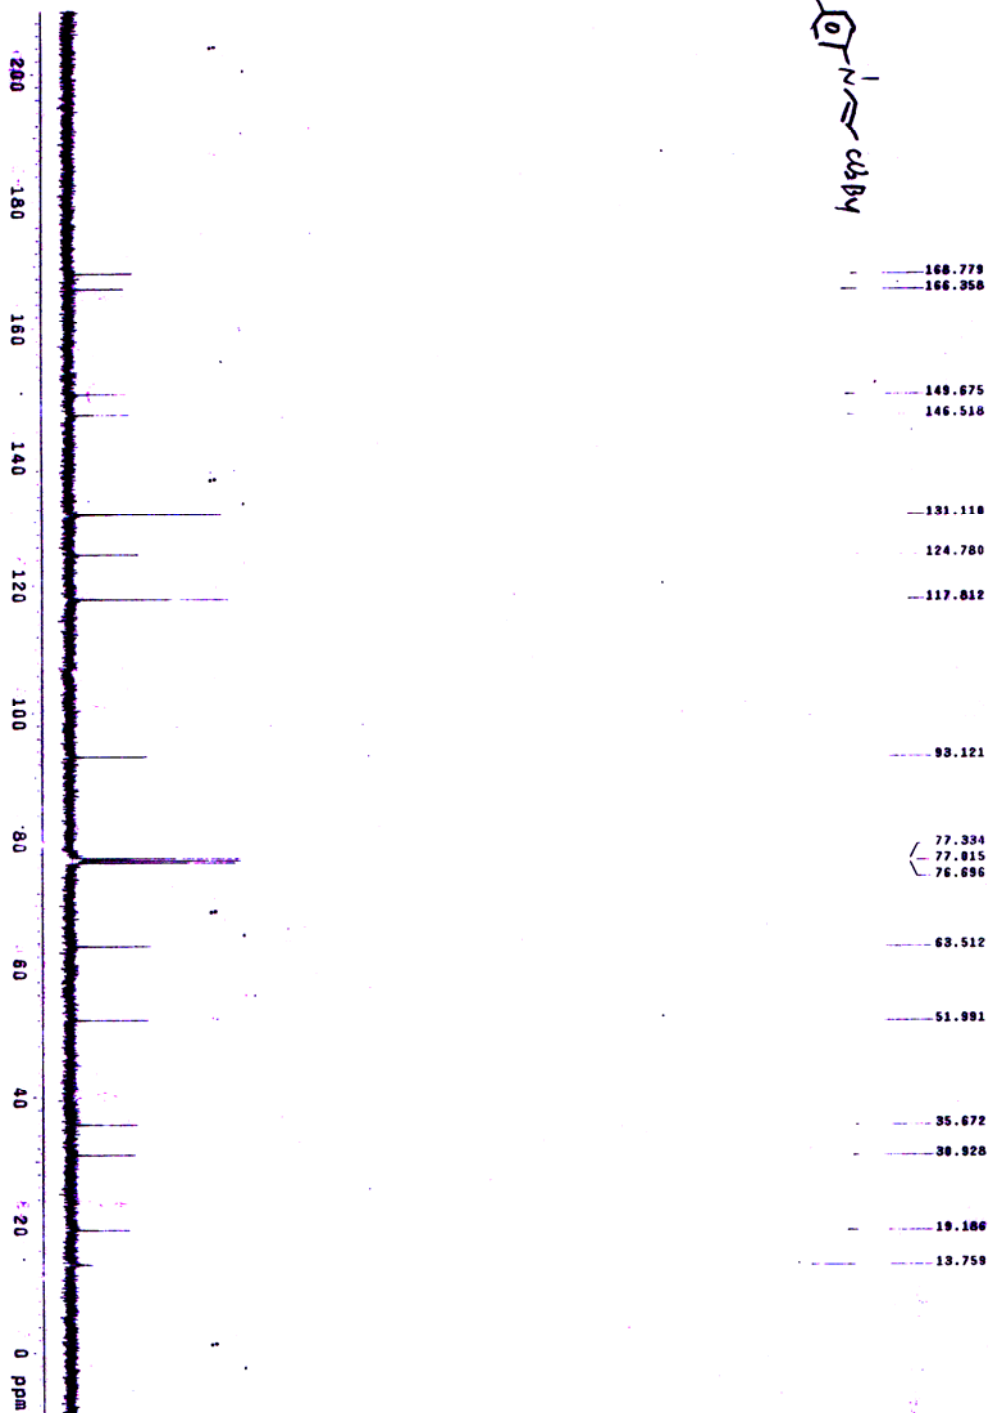

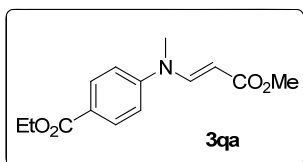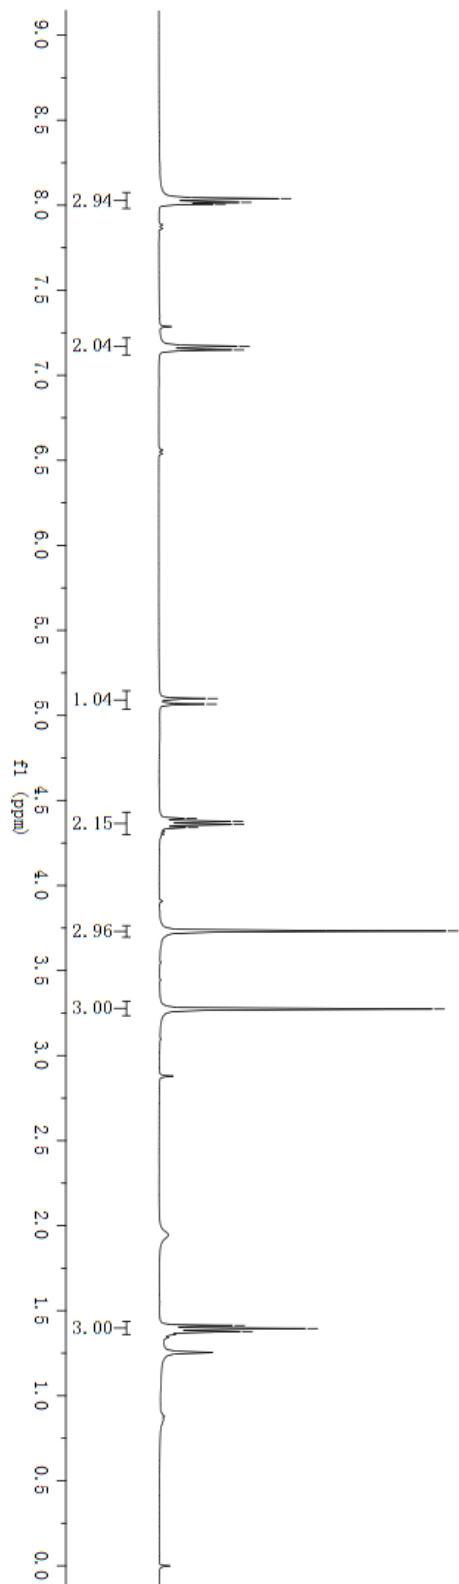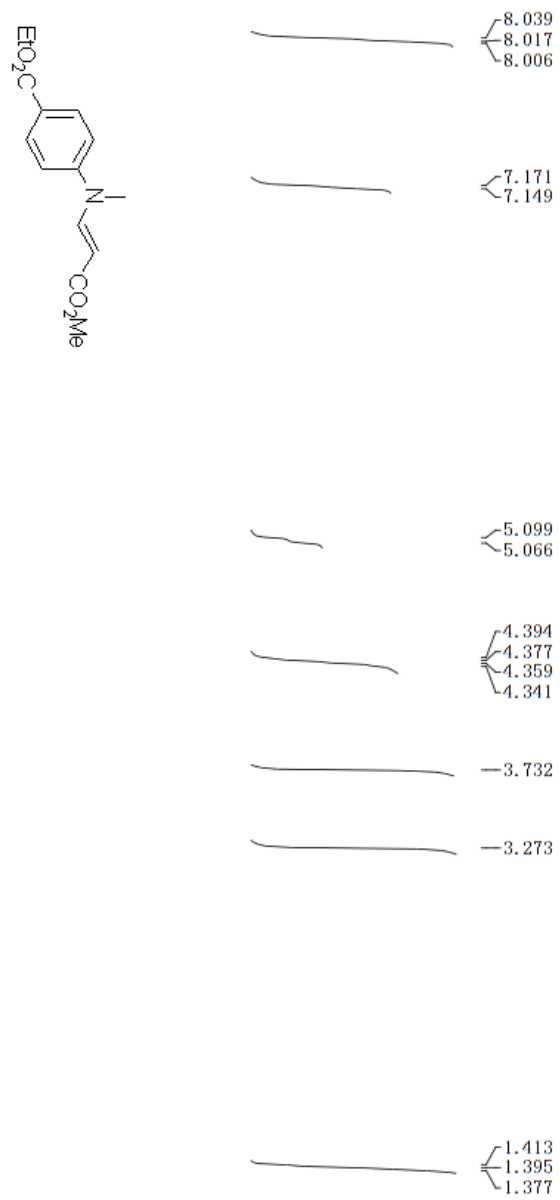

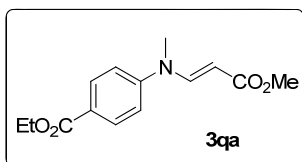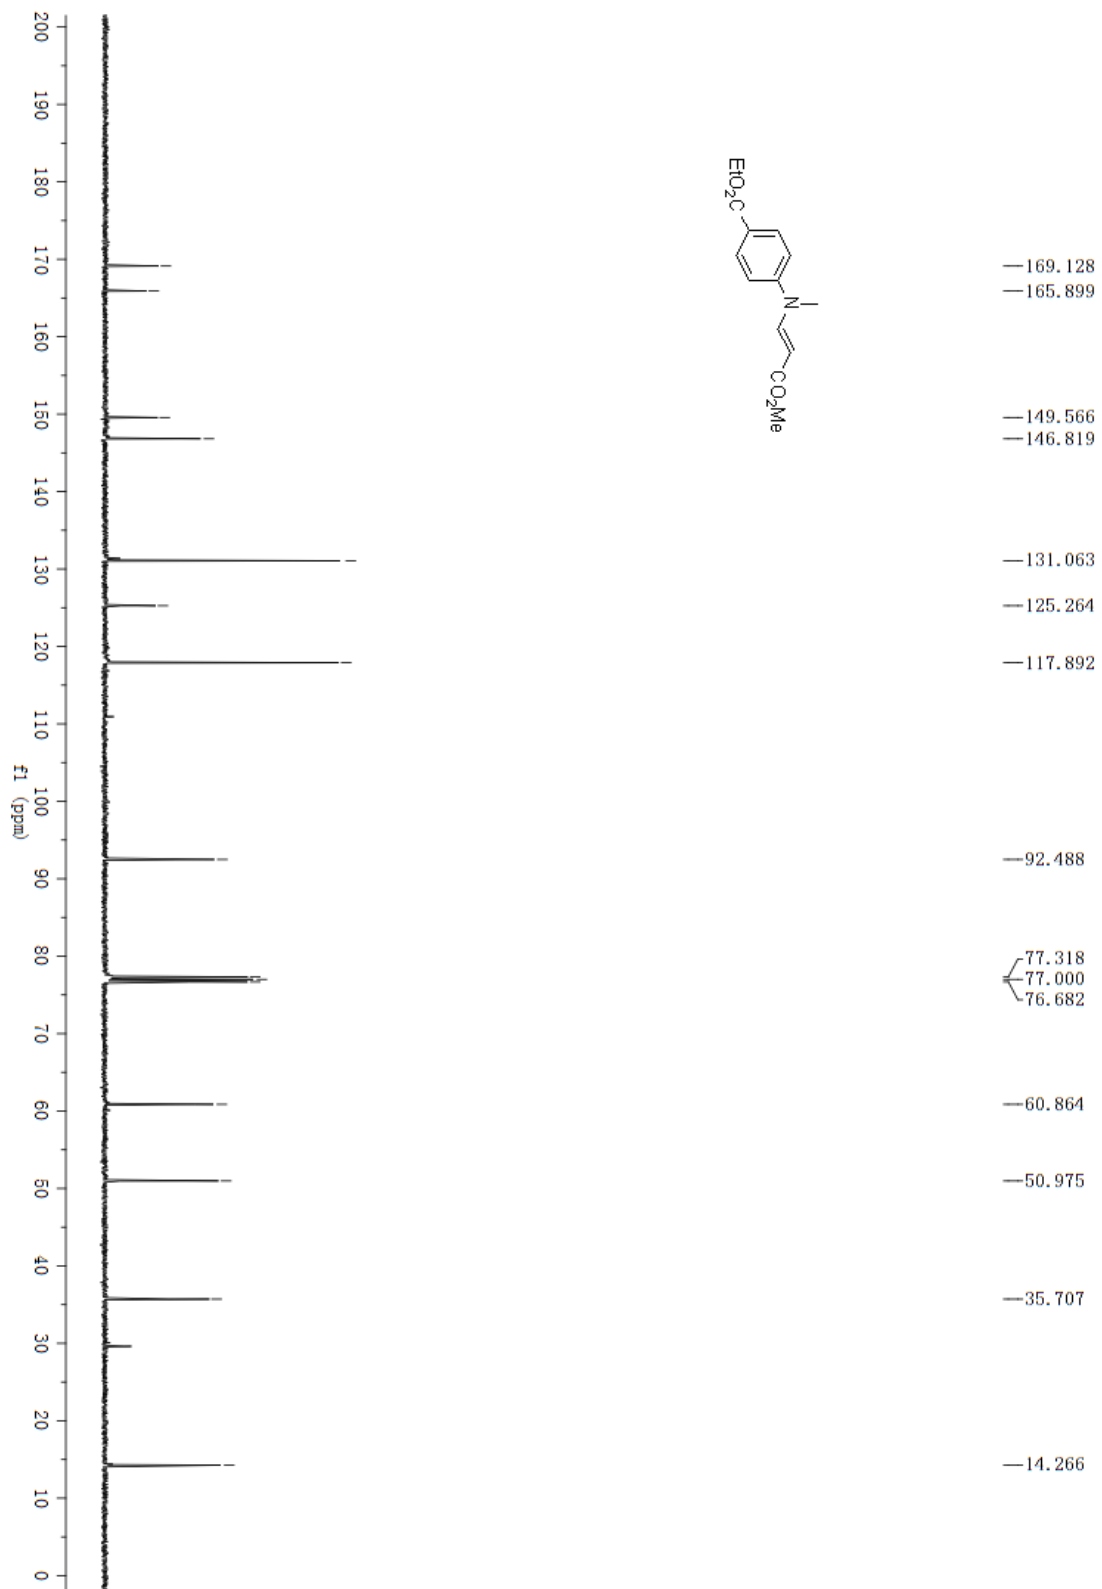

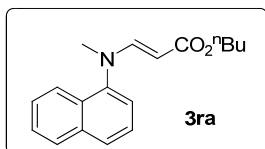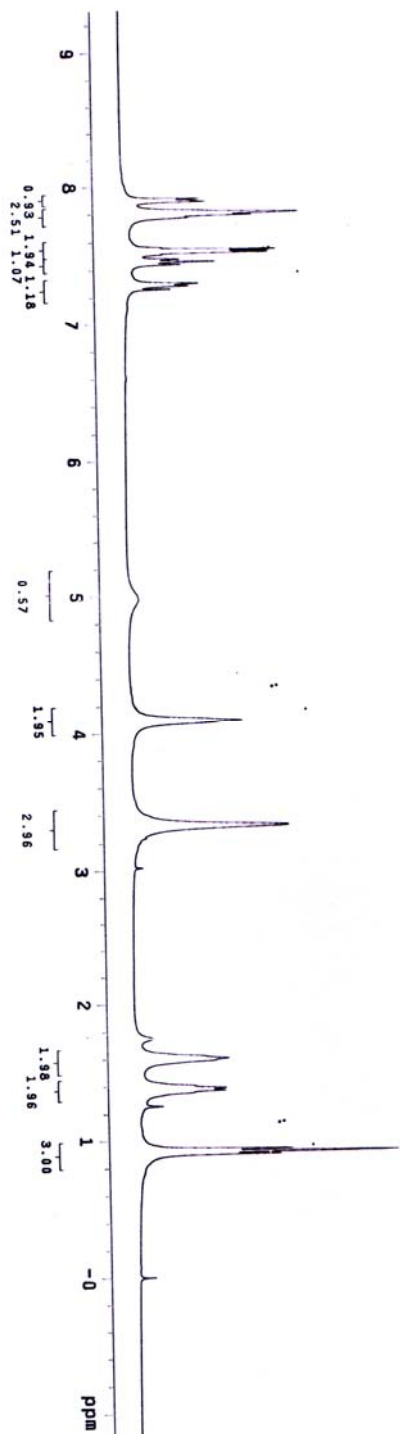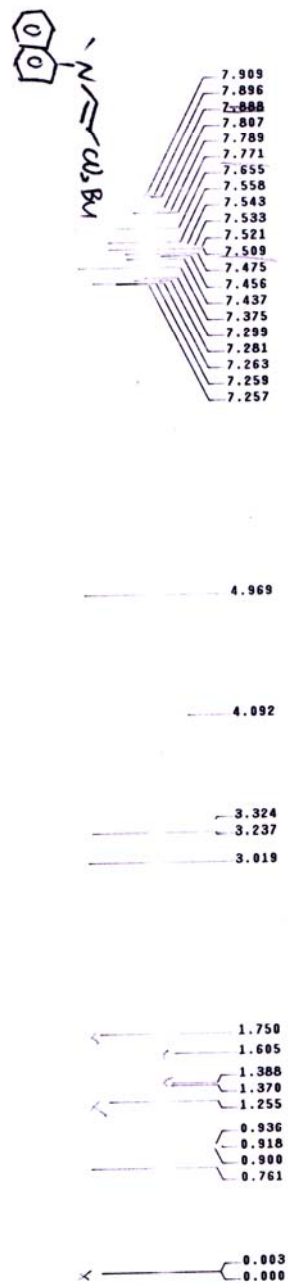

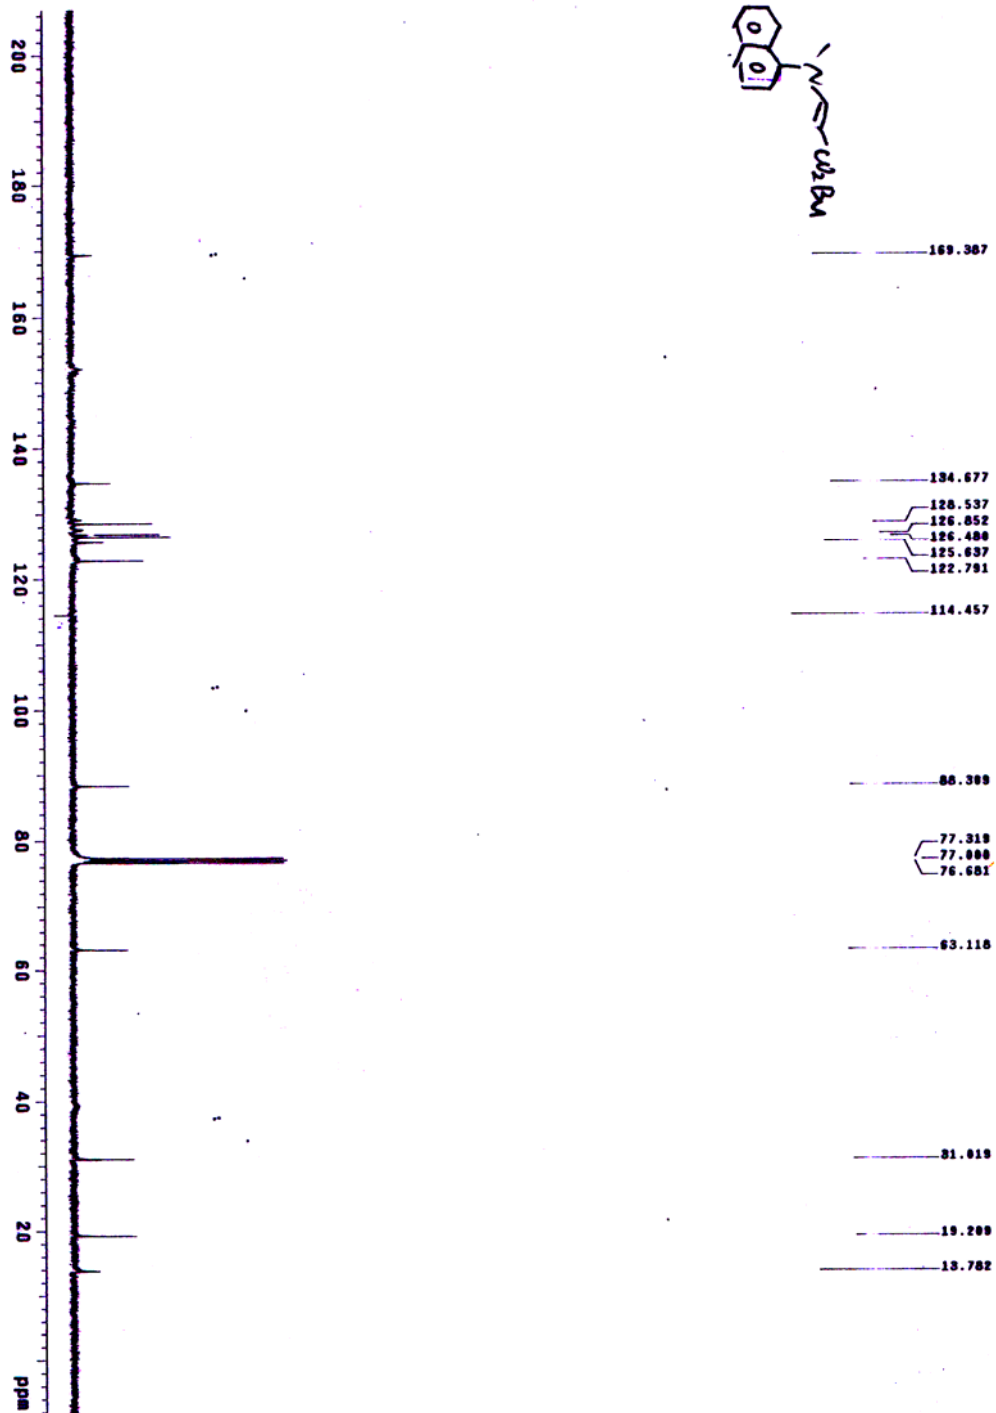

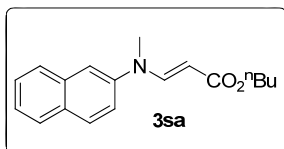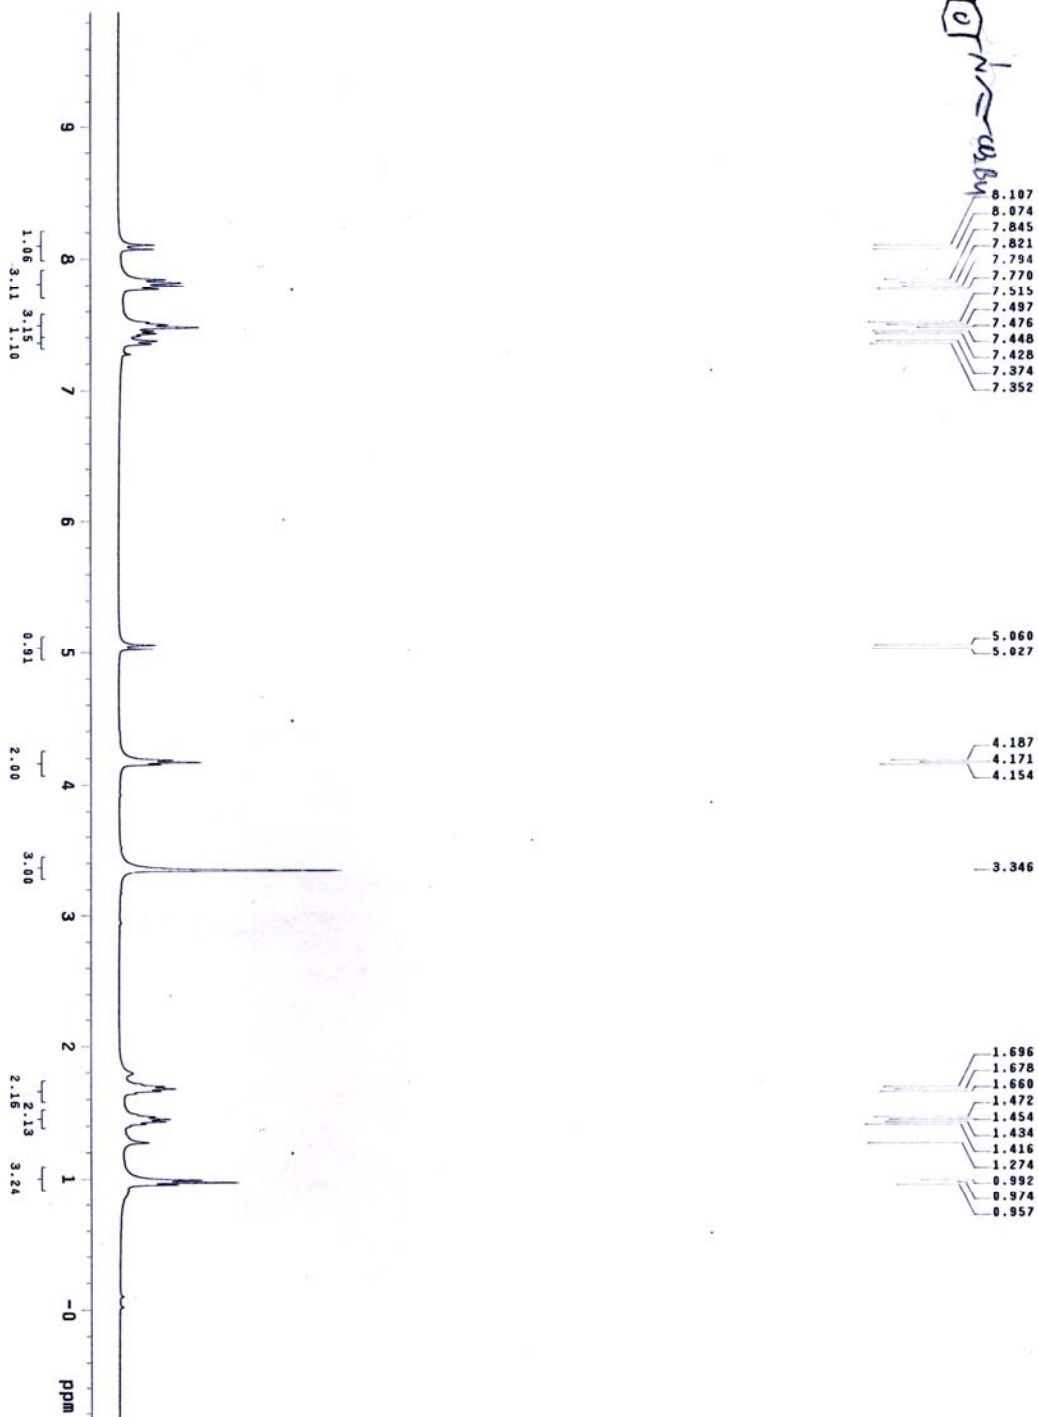

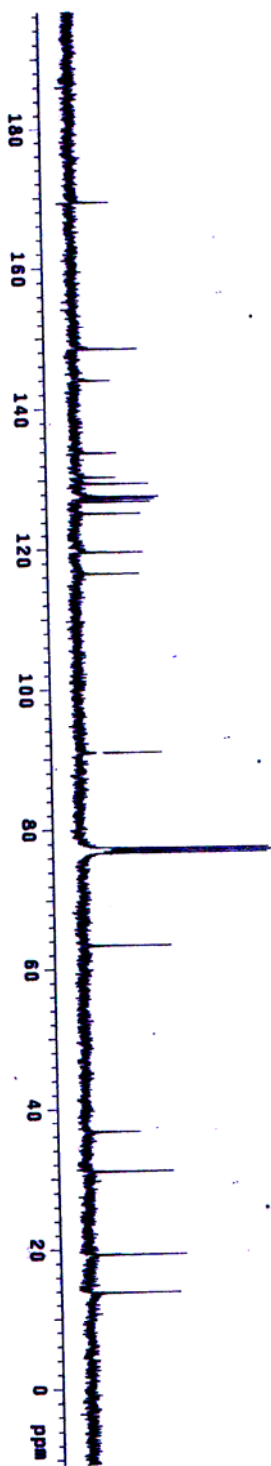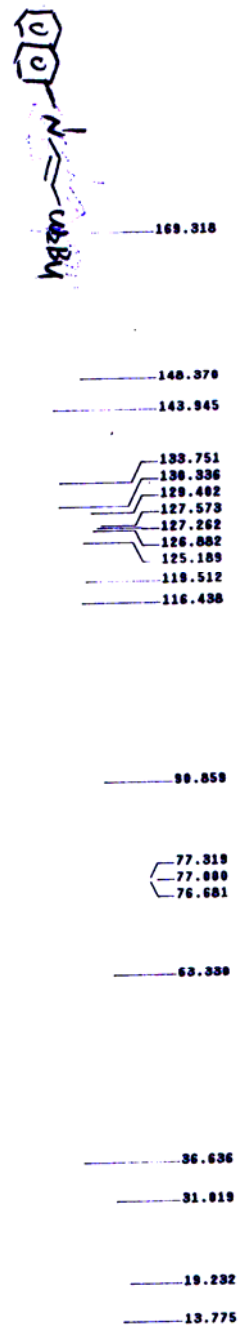



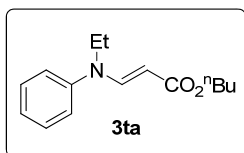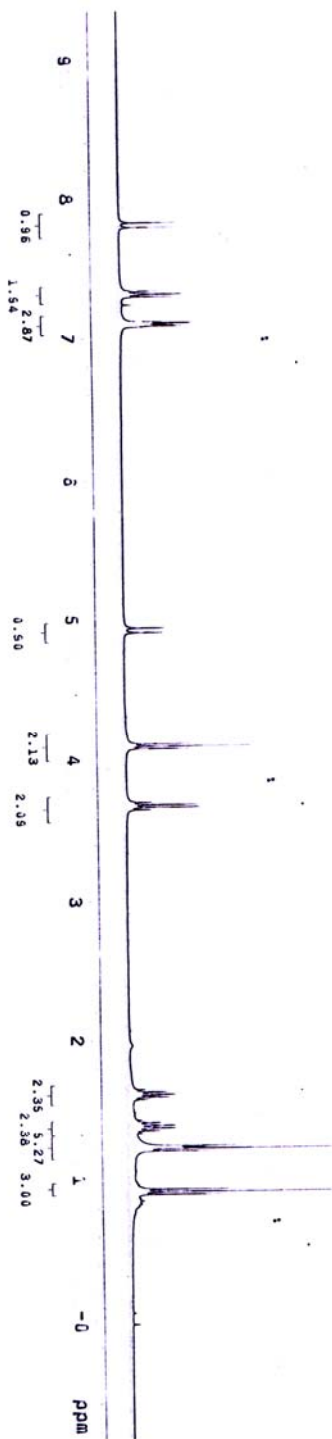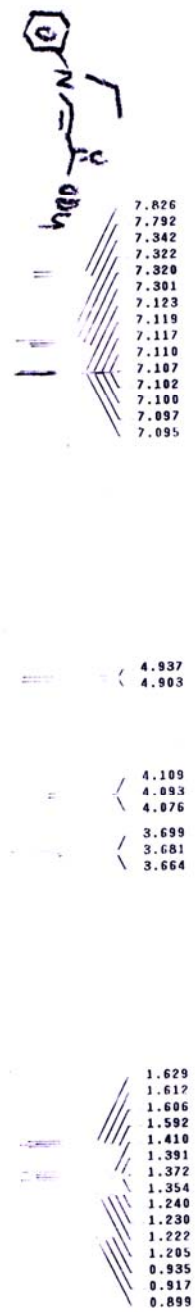

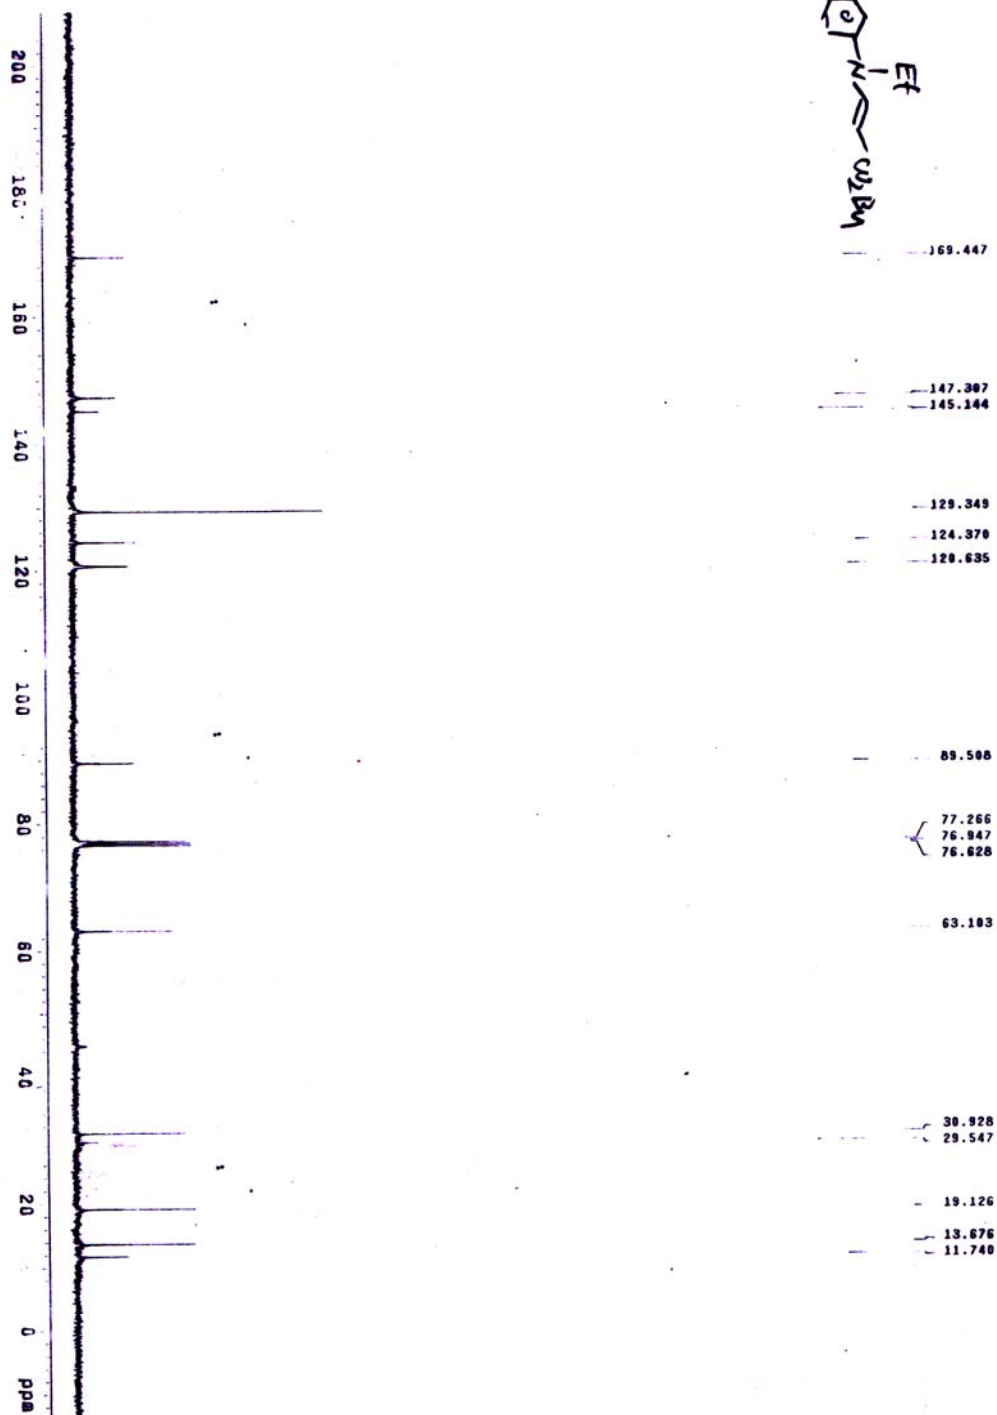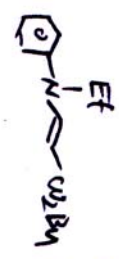

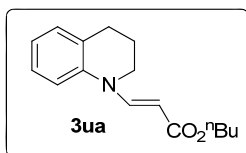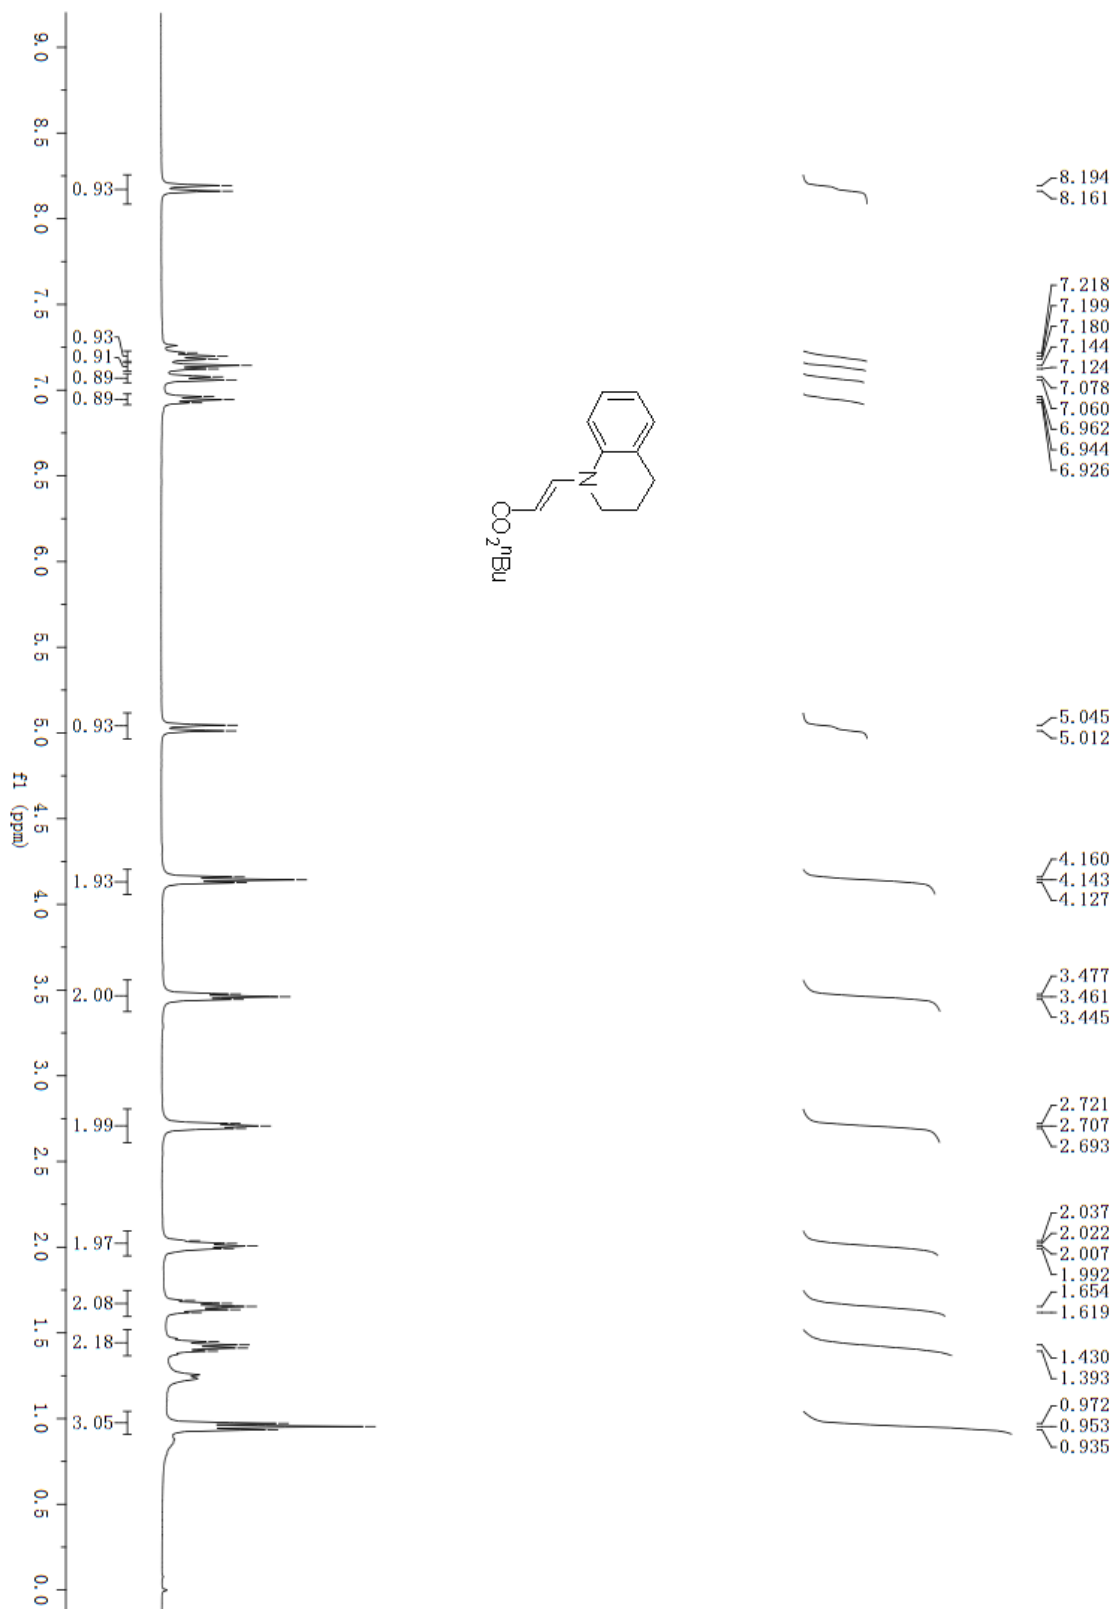

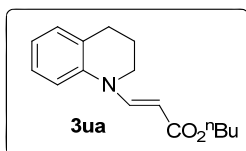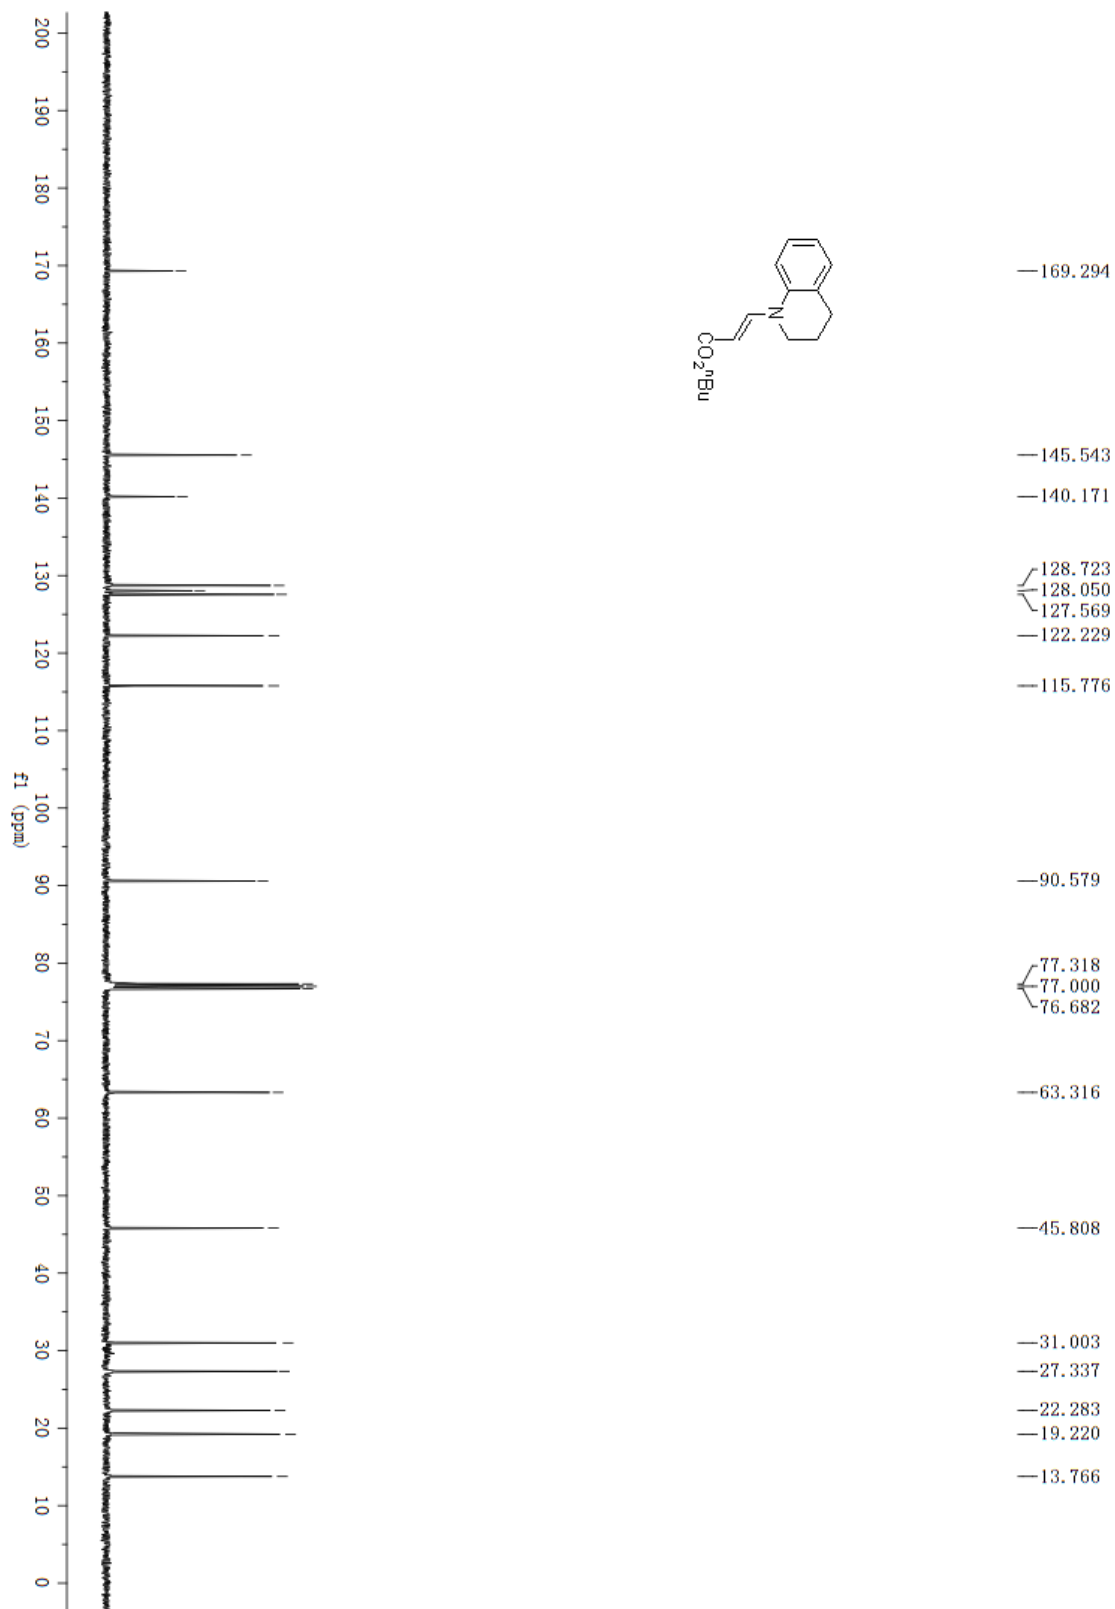

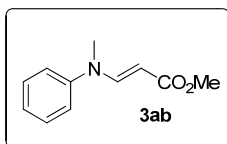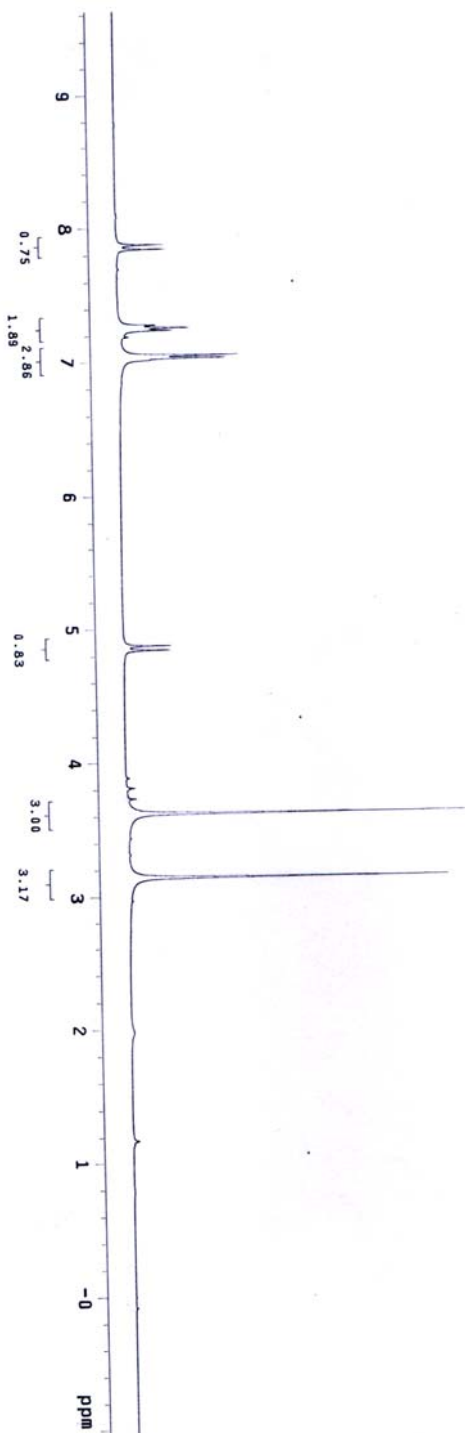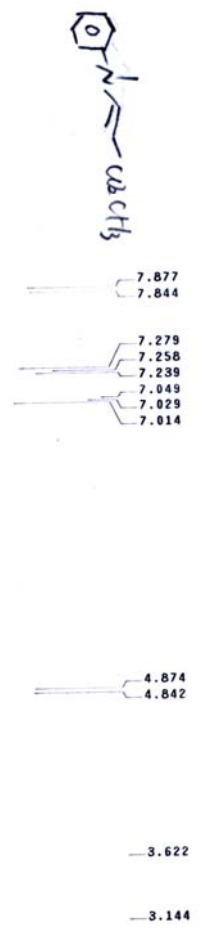

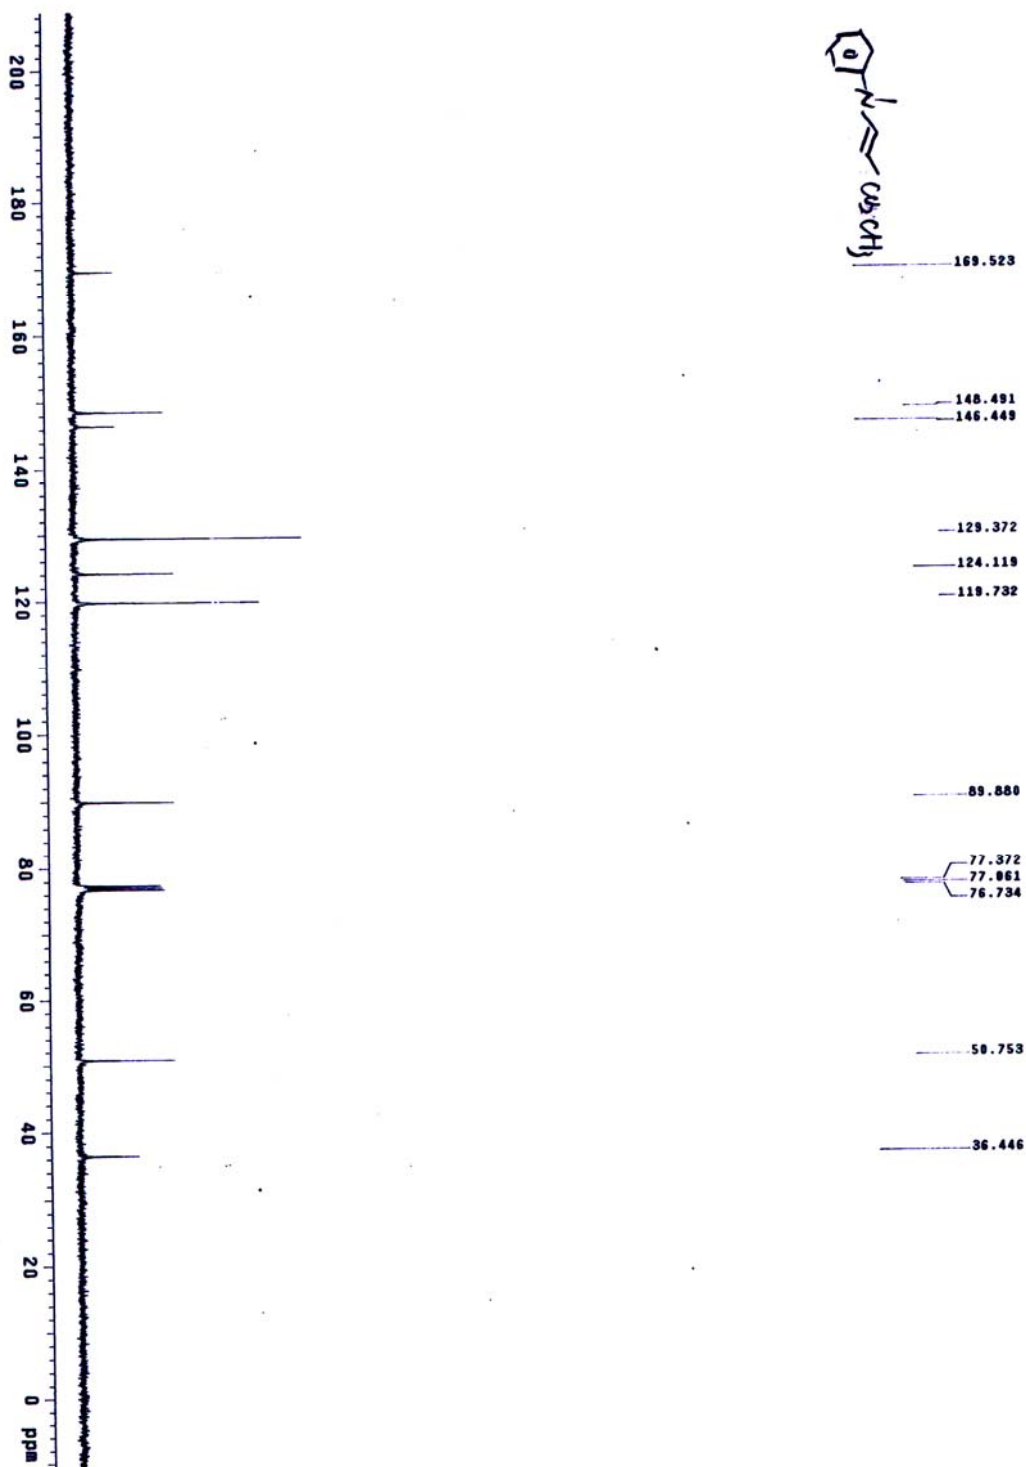

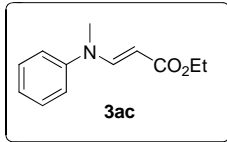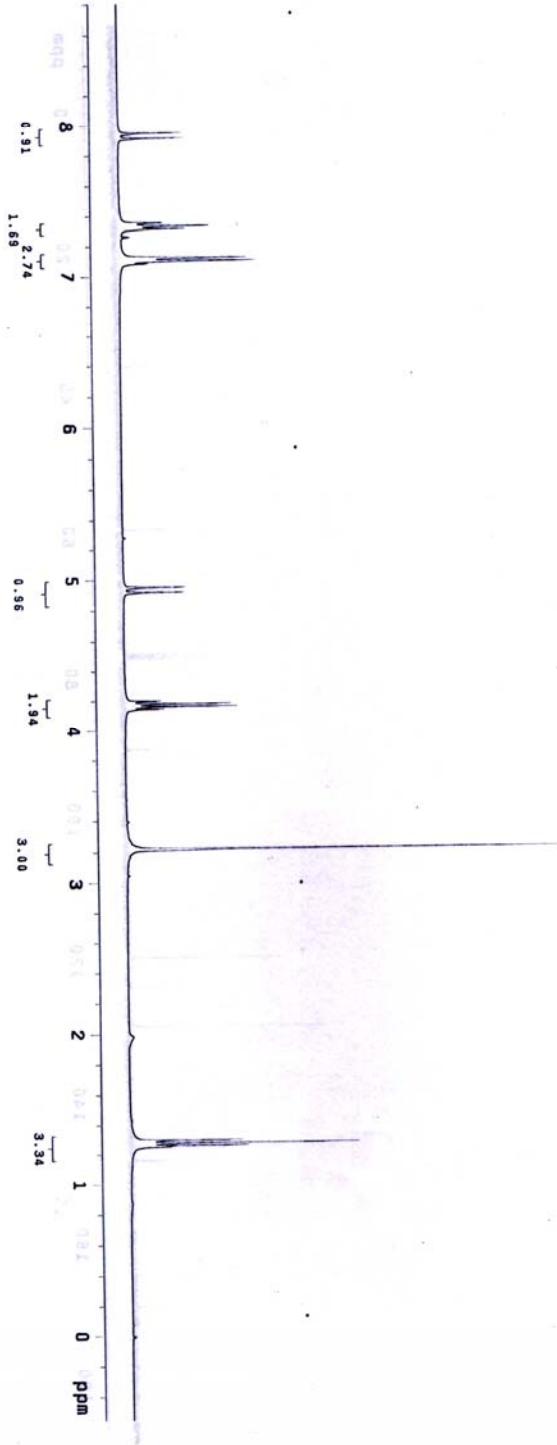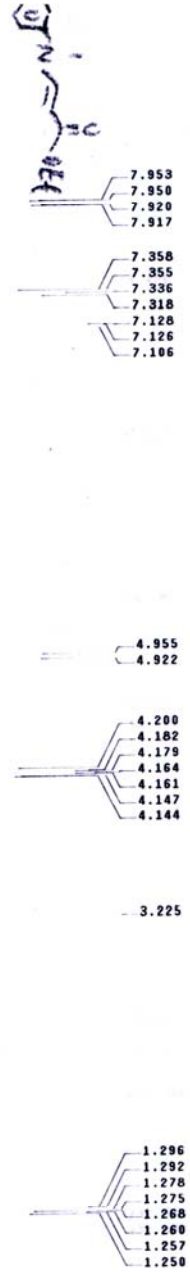

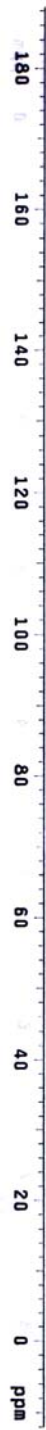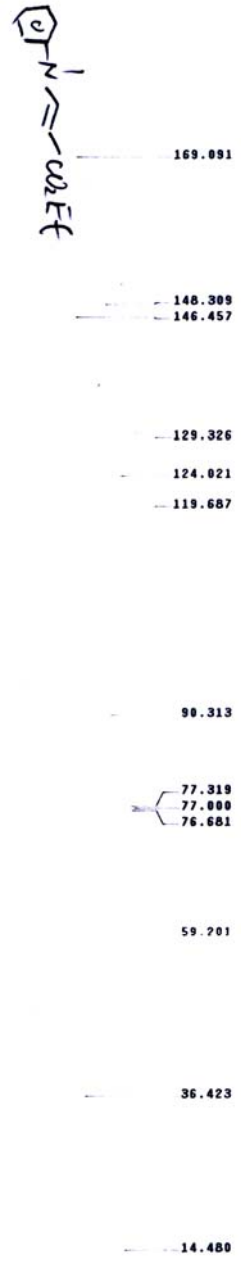



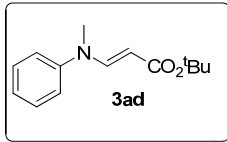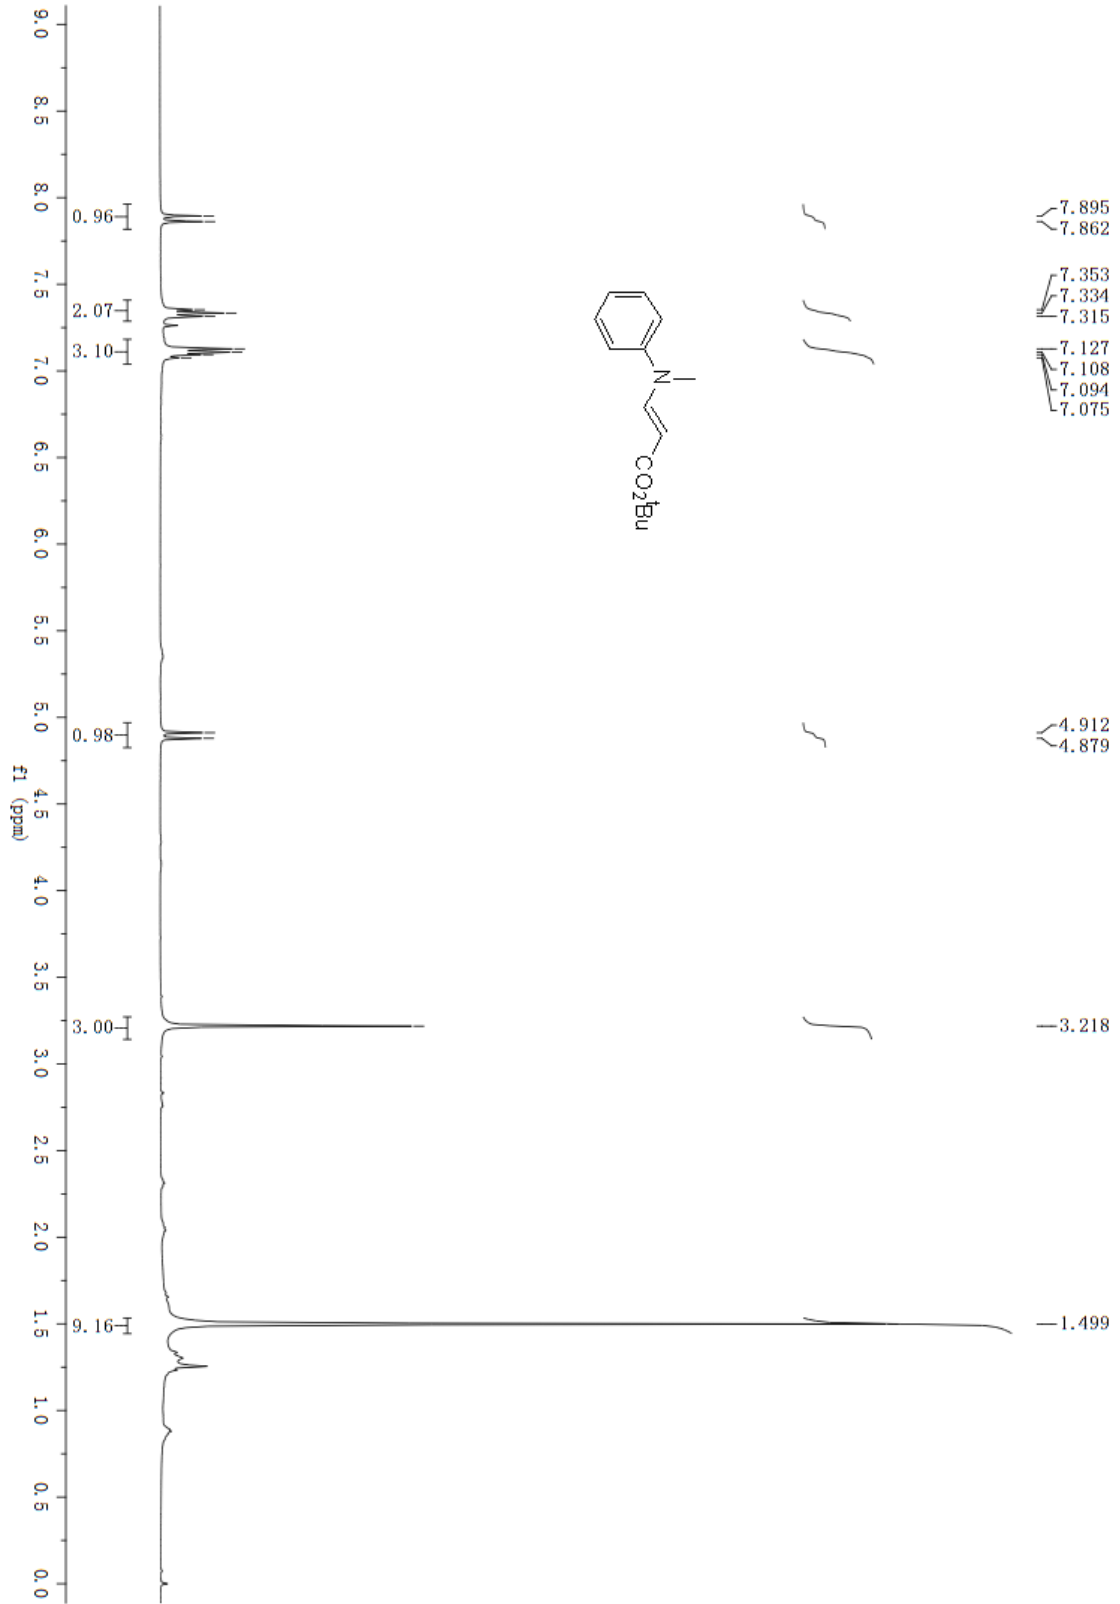

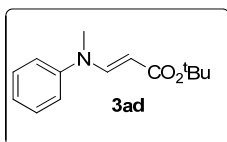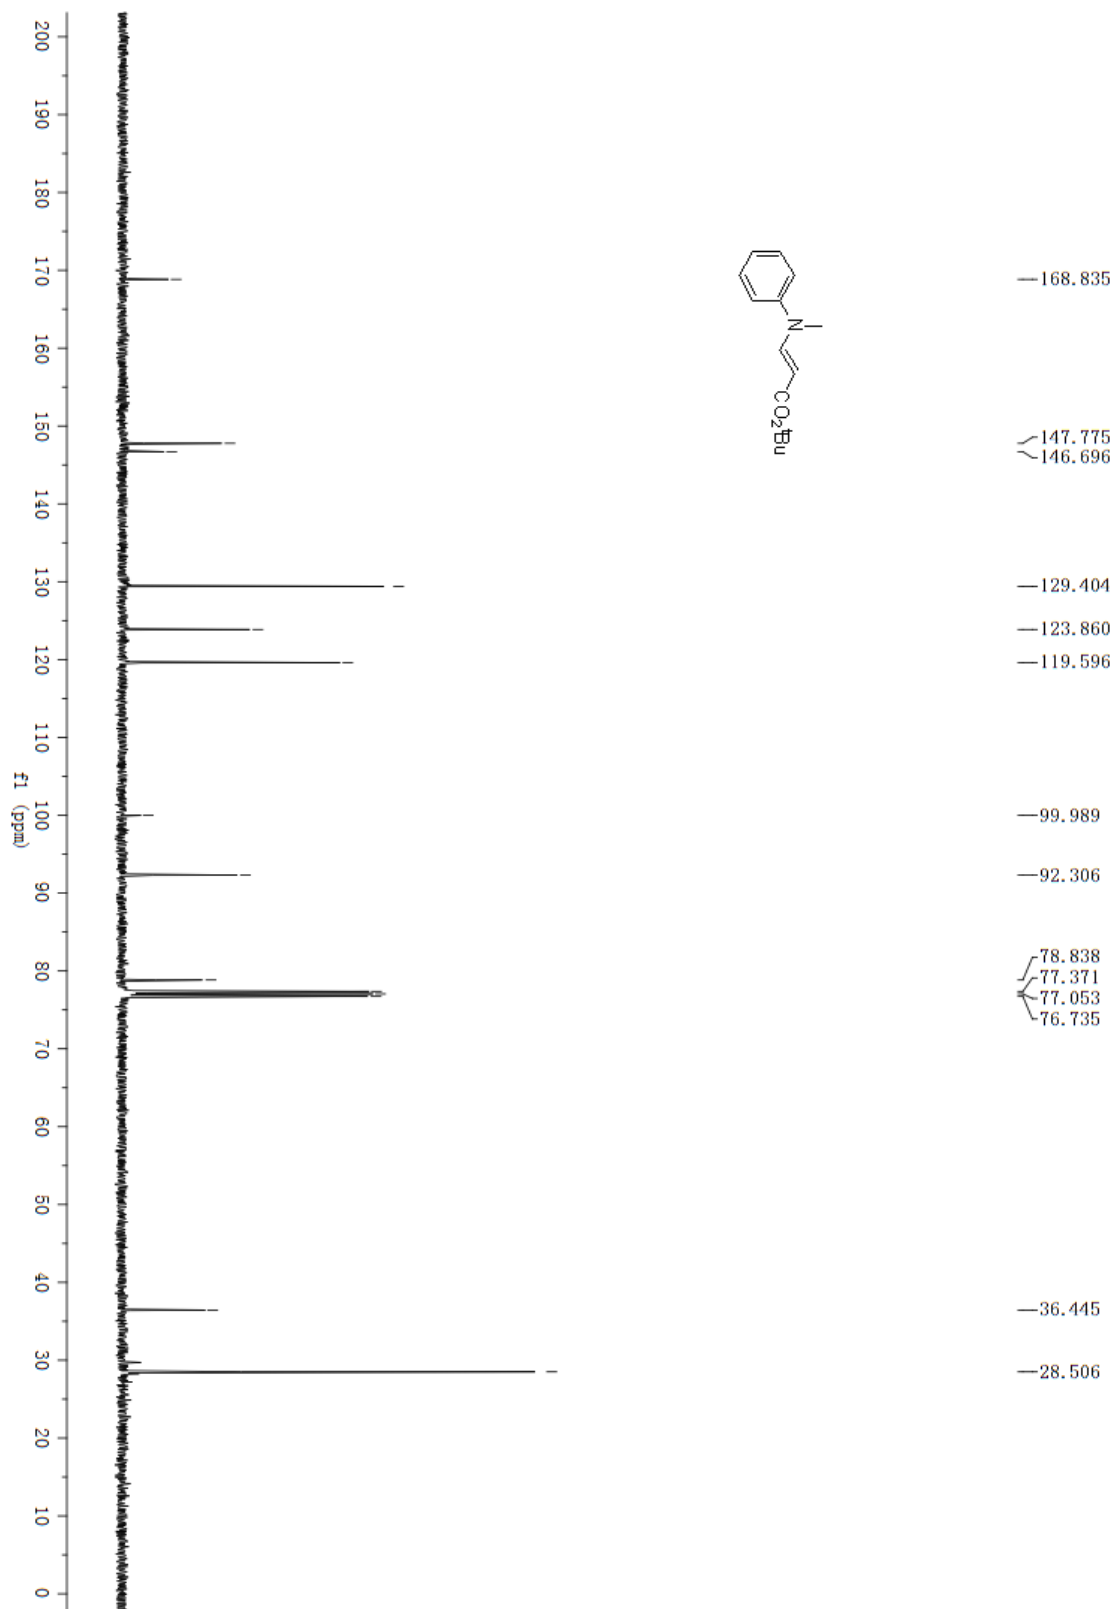

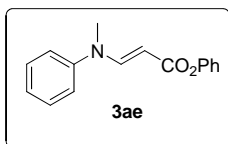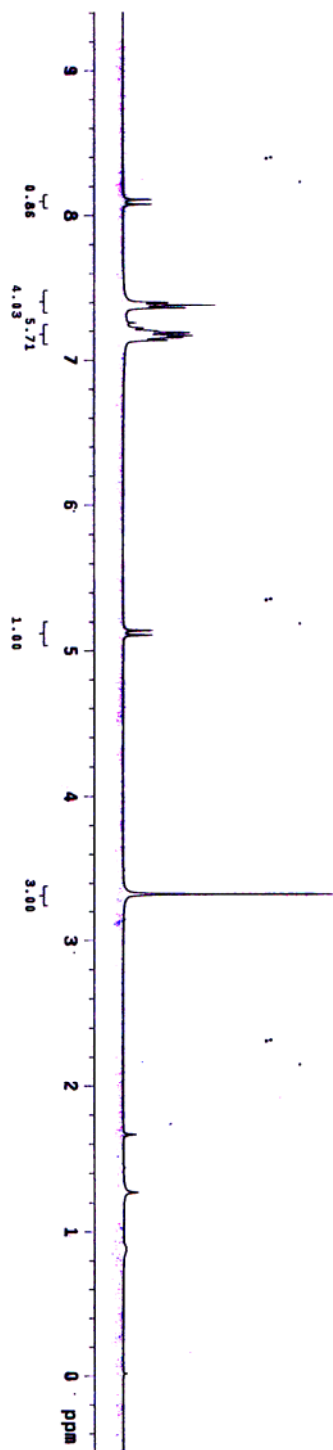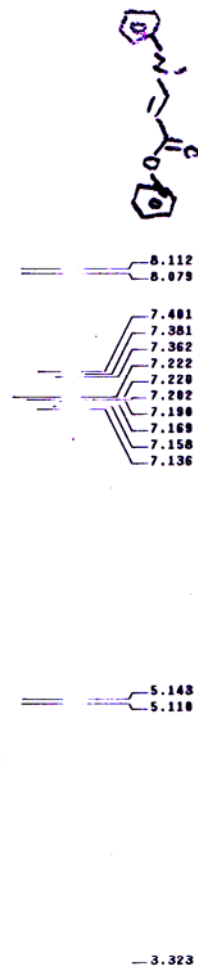

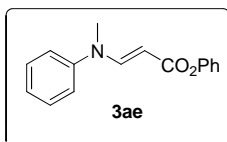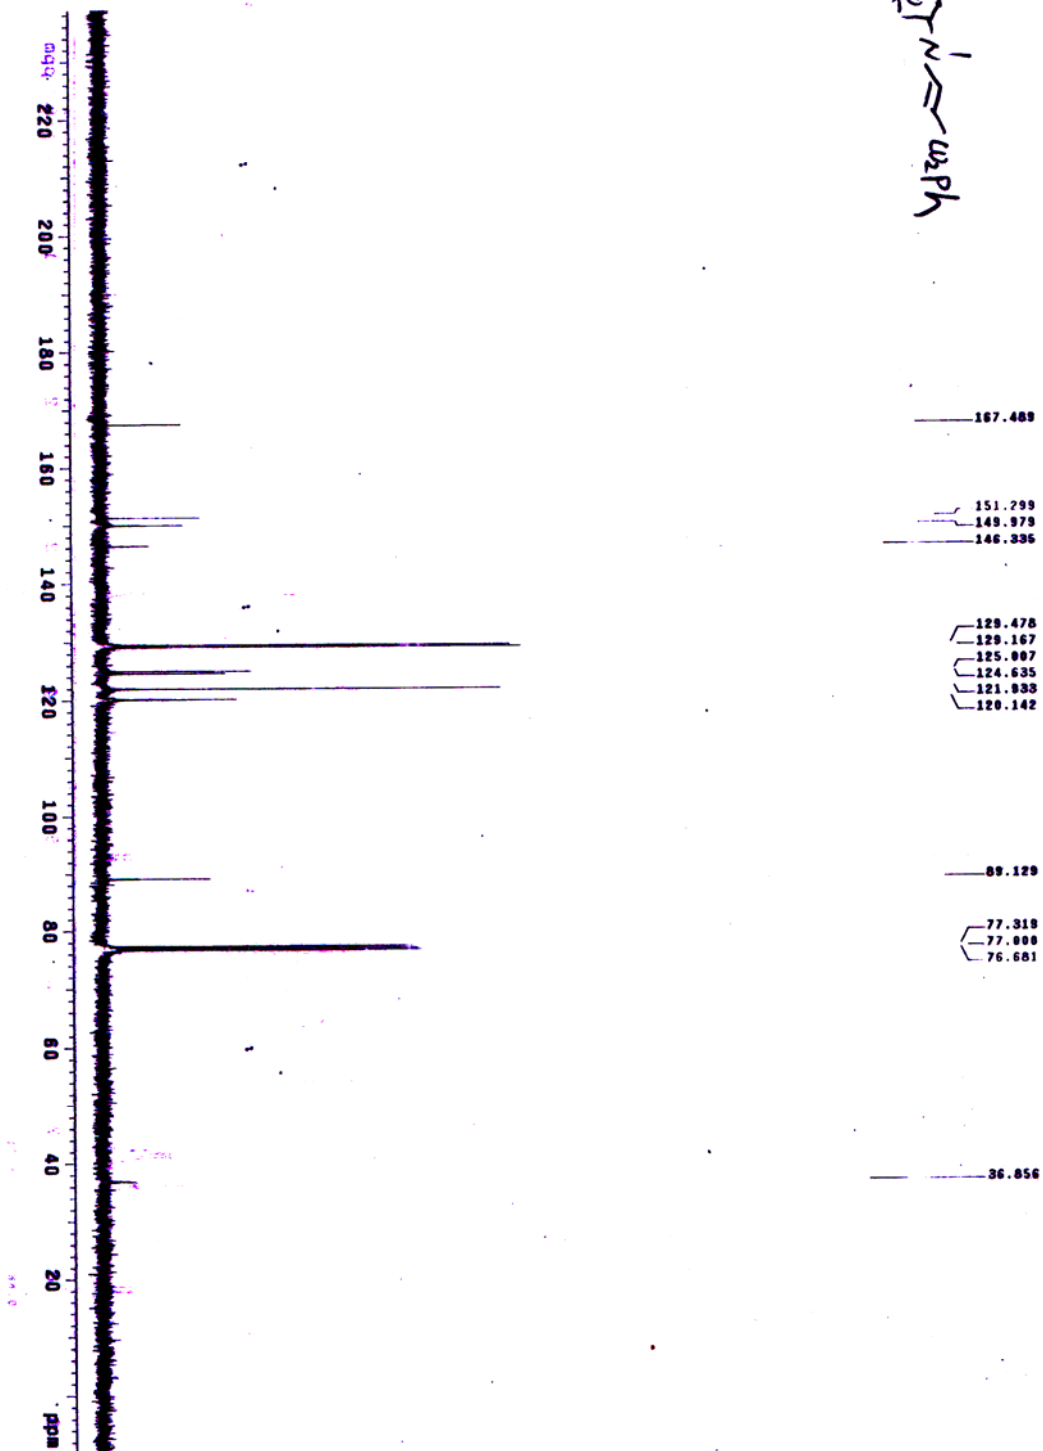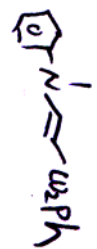

Supplement: c4ra11543k1.pdf [file c4ra11543k1.pdf]
